# Supplementary material
Source: publisher site journal article supplement (https://www.dovepress.com/article/547038)
Supplement: Supplementary file 1 [file 547038%20Supplementary%20Material.pdf]

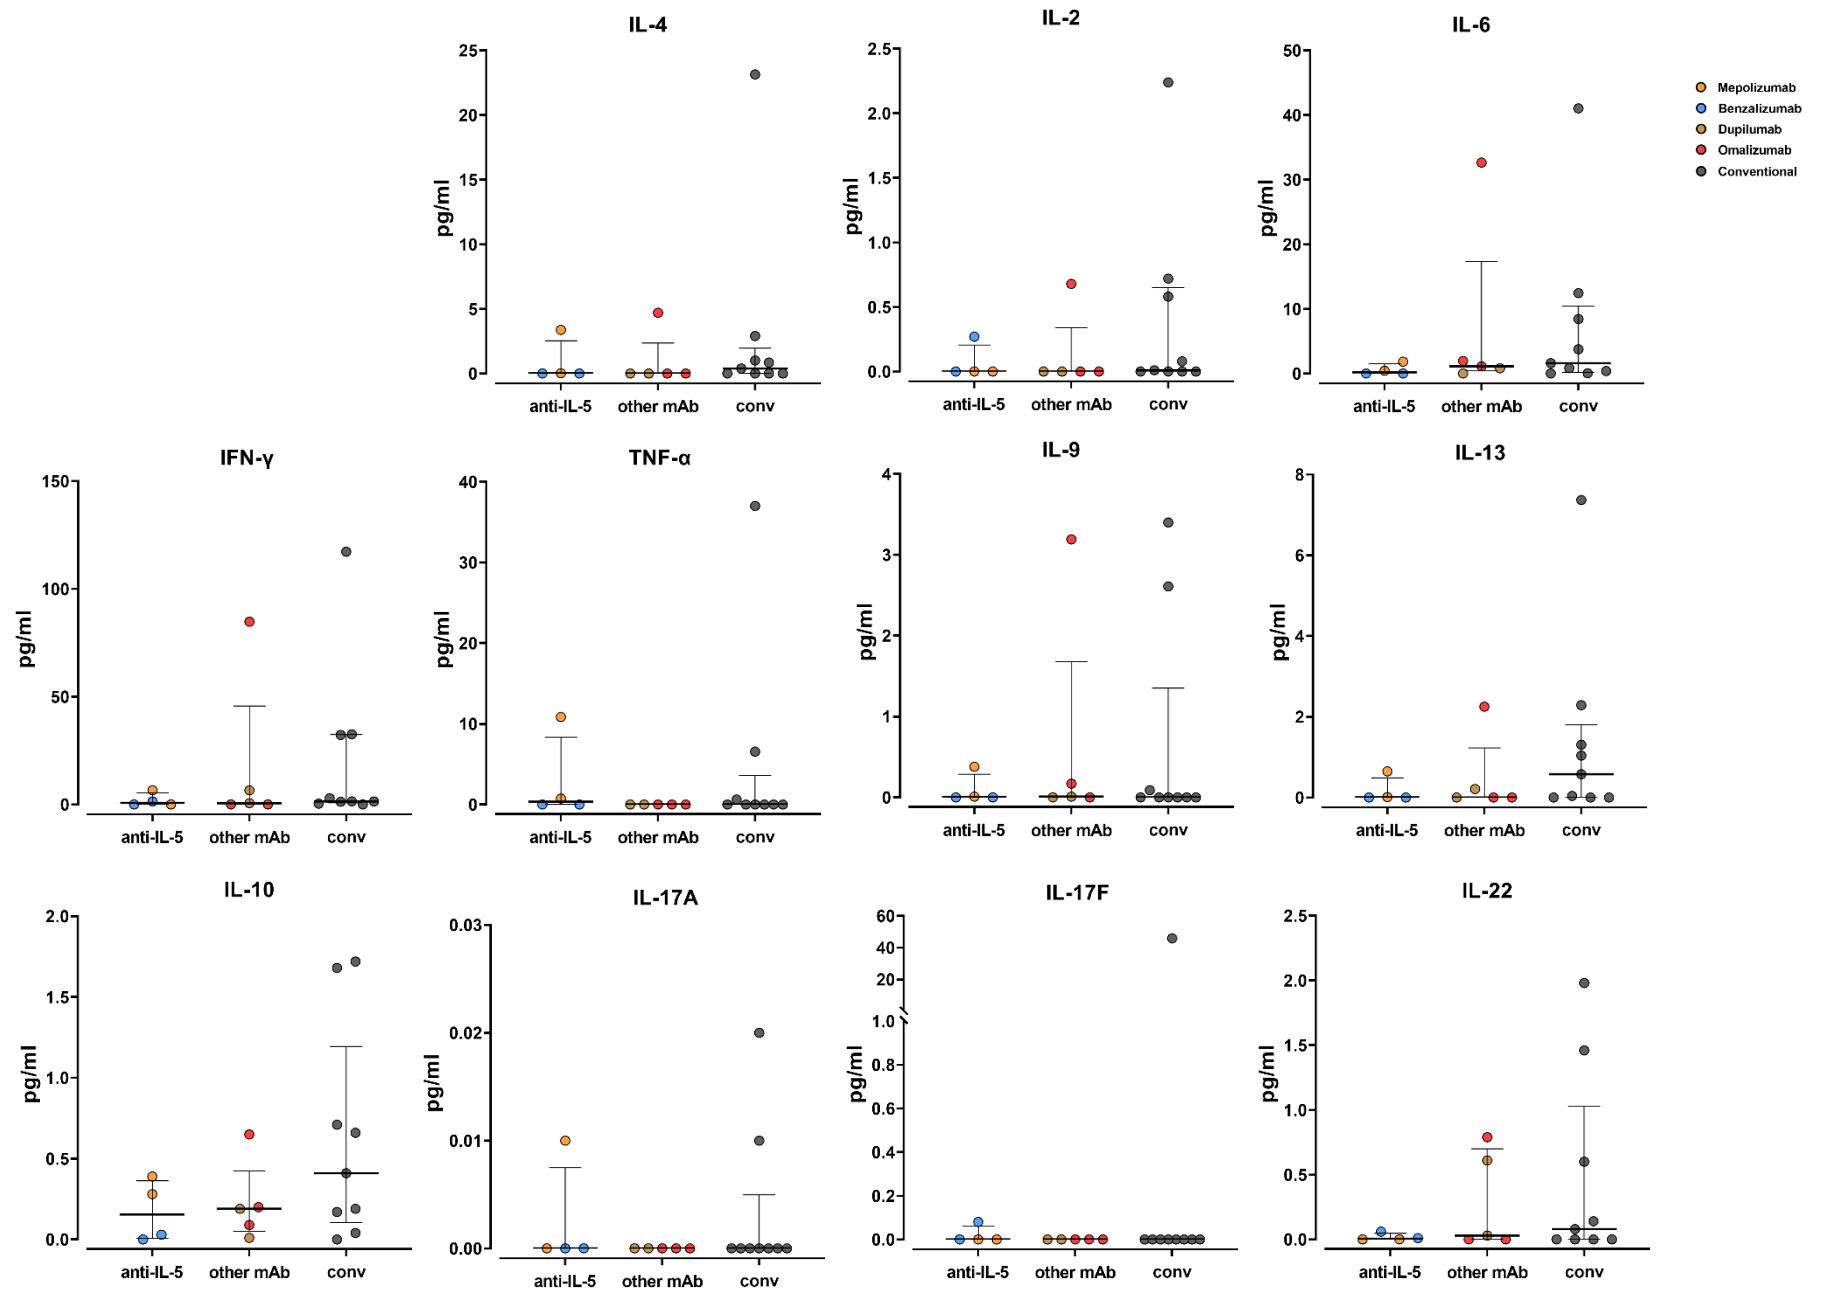

**Supplementary Figure 1. Cytokine concentrations in serum from asthma patients.**

Cytokines (IL-4, IL-2, IL-6, IL-13, IL-10, IL-17A, IL-17F, IL-22) concentrations (pg/mL) to each participant were measured using a bead cytokine assay (LegendPlex™) in anti-IL-5 (mepolizumab/benralizumab), other mAb (dupilumab/omalizumab), and conventional therapy (conv) treated asthma patients. Data are presented as median ± interquartile range.



**Supplementary Figure 2. Cytokine concentrations in nasal swabs from asthma patients.**

Cytokines (IL-4, IL-2, IL-6, IL-13, IL-10, IL-17A, IL-17F, IL-22) concentrations (pg/mL) to each participant were measured using a bead cytokine assay (LegendPlex™) in anti-IL-5 (mepolizumab/benralizumab), other mAb (dupilumab/omalizumab), and conventional therapy (conv) treated asthma patients. Data are presented as median ± interquartile range. Statistical significance is indicated by p-values.

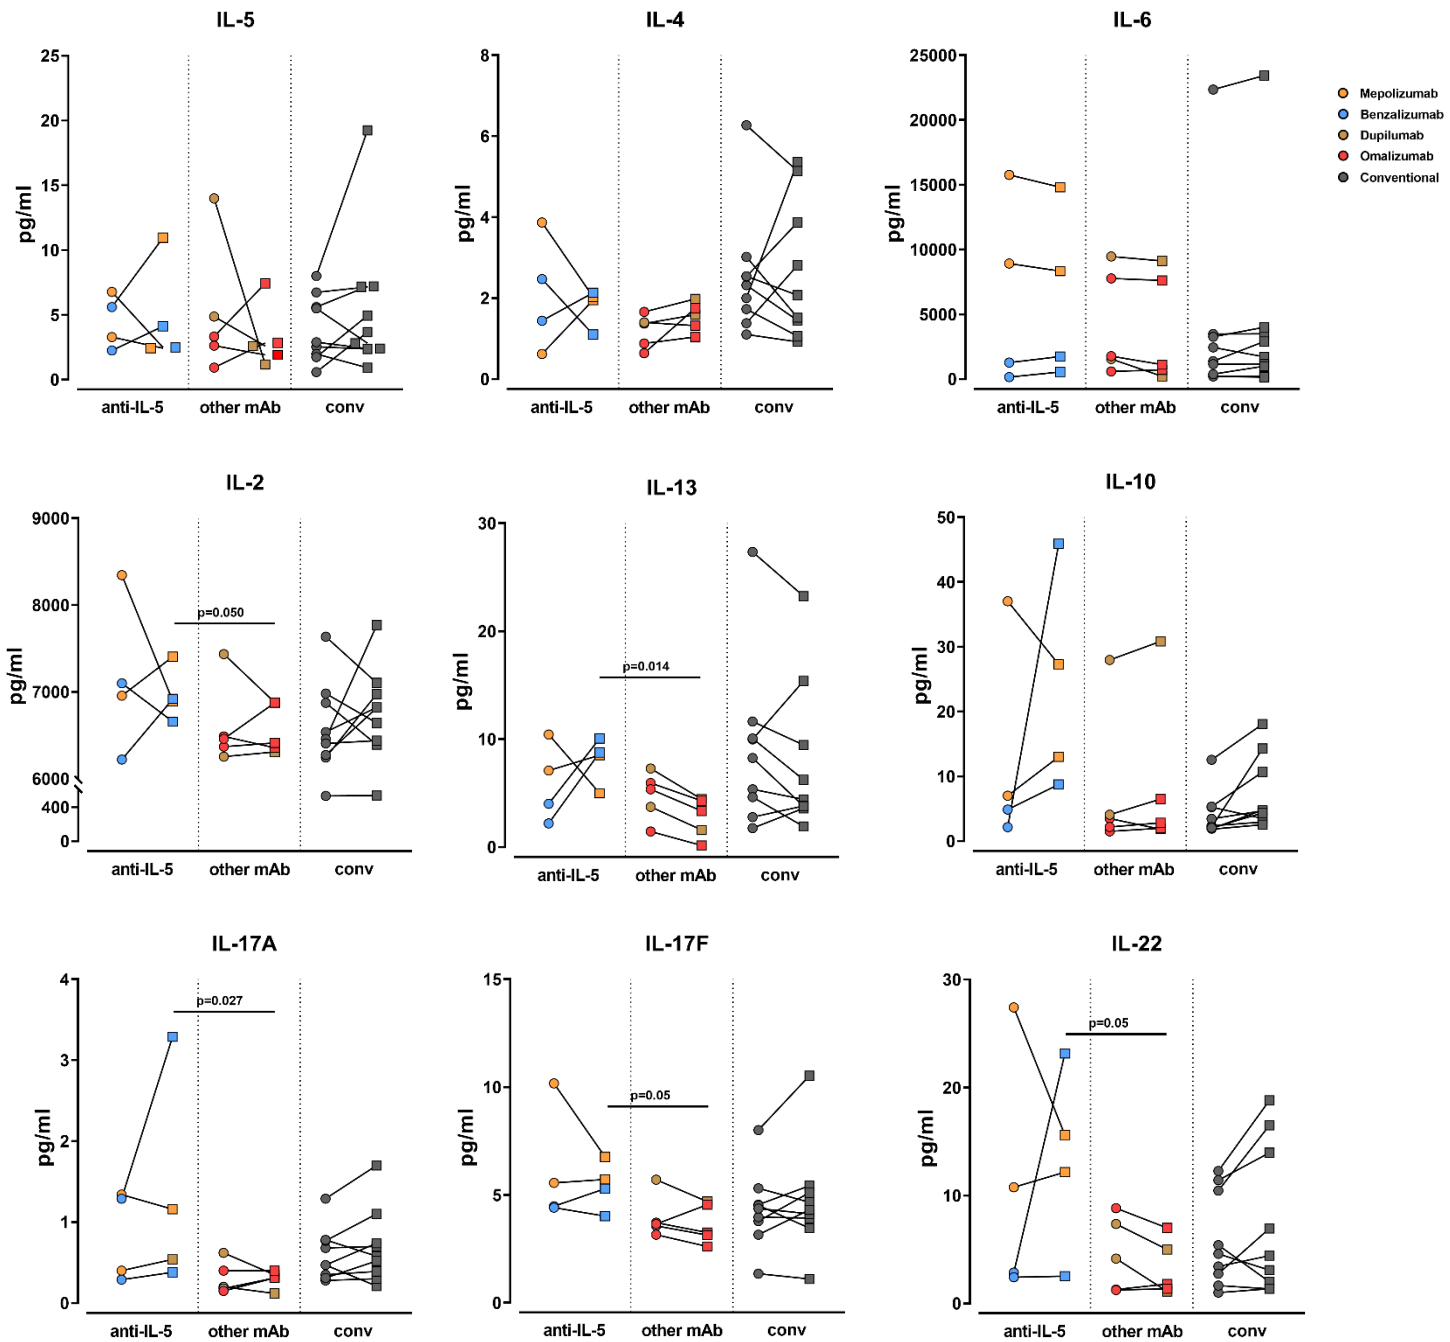

**Supplementary Figure 3. Cytokine concentrations in cell culture supernatants upon in vitro stimulation with SARS-CoV-2-spike.**

Cytokines (IL-4, IL-2, IL-6, IL-13, IL-10, IL-17A, IL-17F, IL-22) concentrations (pg/mL) to each participant were measured using a bead cytokine assay (LegendPlex™) in anti-IL-5 (mepolizumab/benralizumab), other mAb (dupilumab/omalizumab), and conventional therapy (conv) treated asthma patients pre and post in vitro stimulation with SARS-CoV-2-spike protein. Data are presented as median ± interquartile range. Statistical significance is indicated by p-values.

A

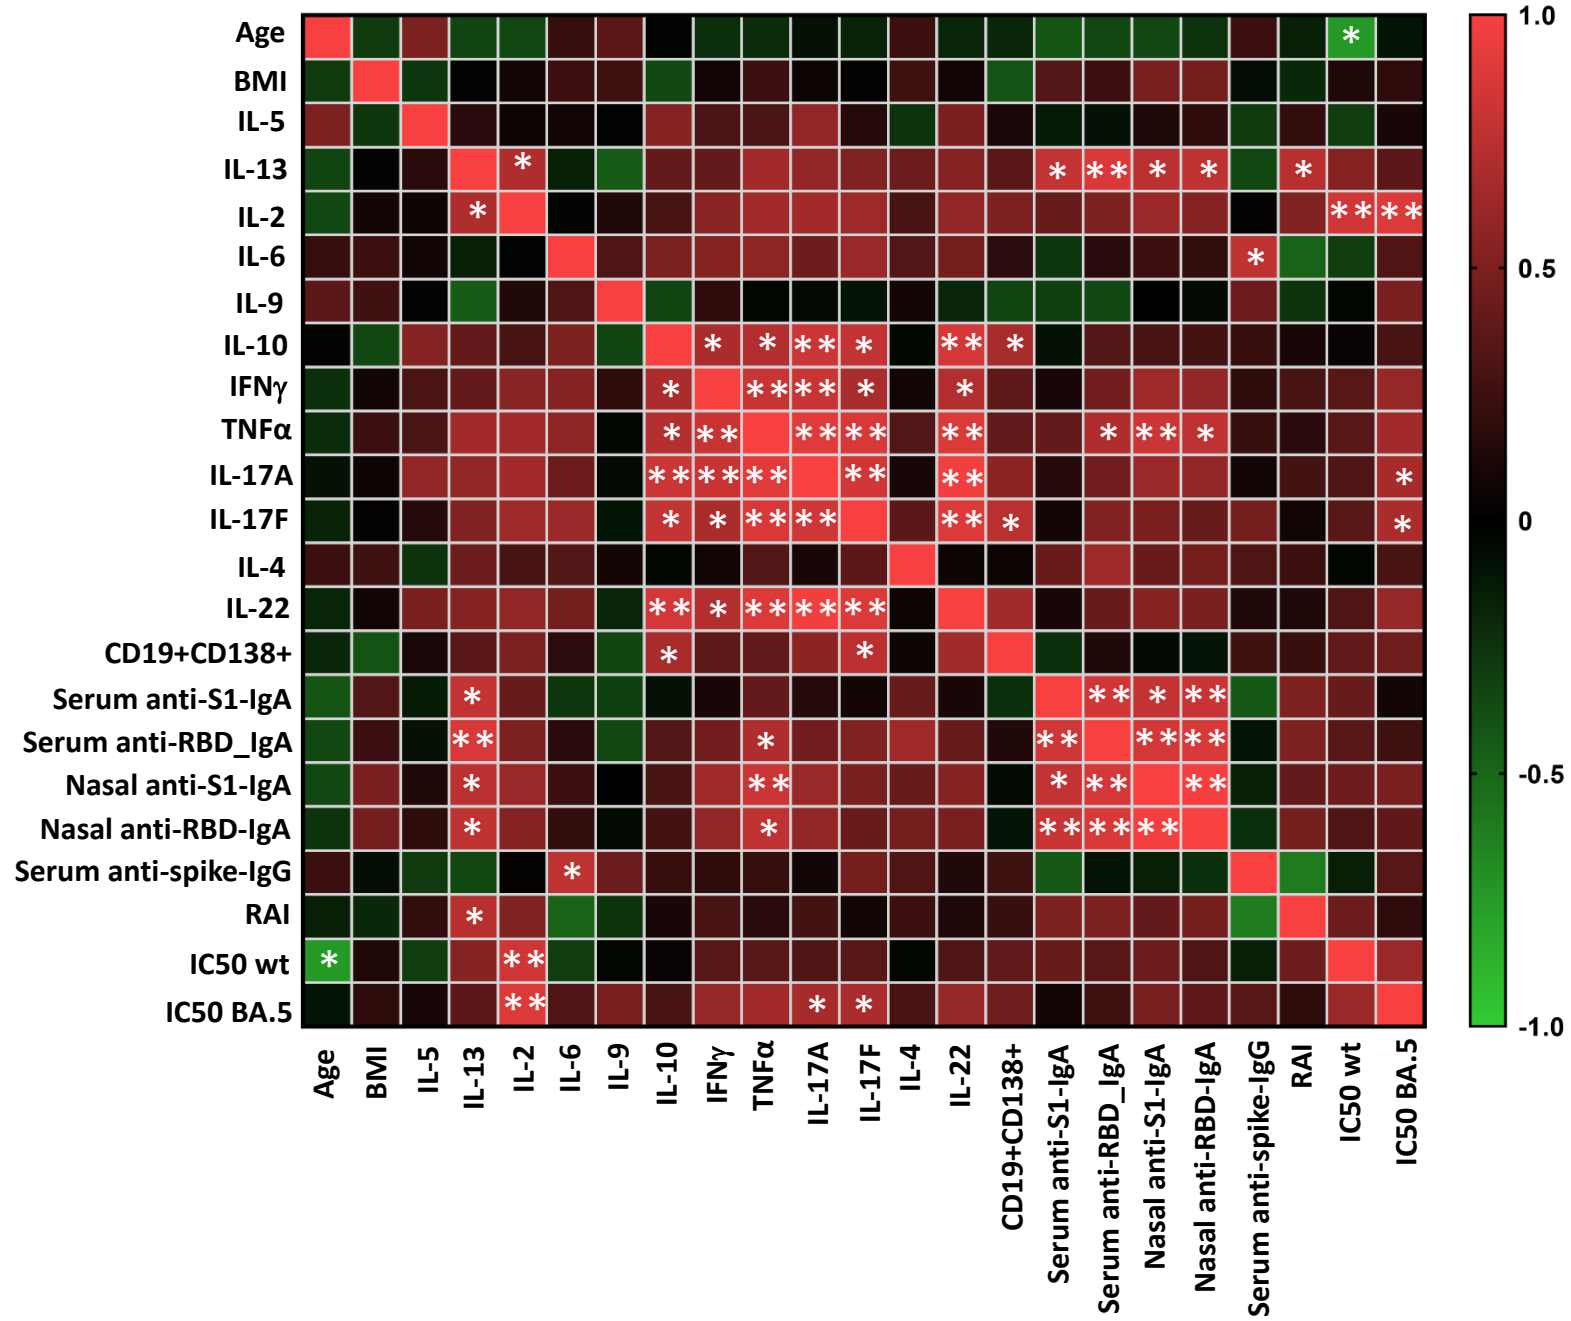



C

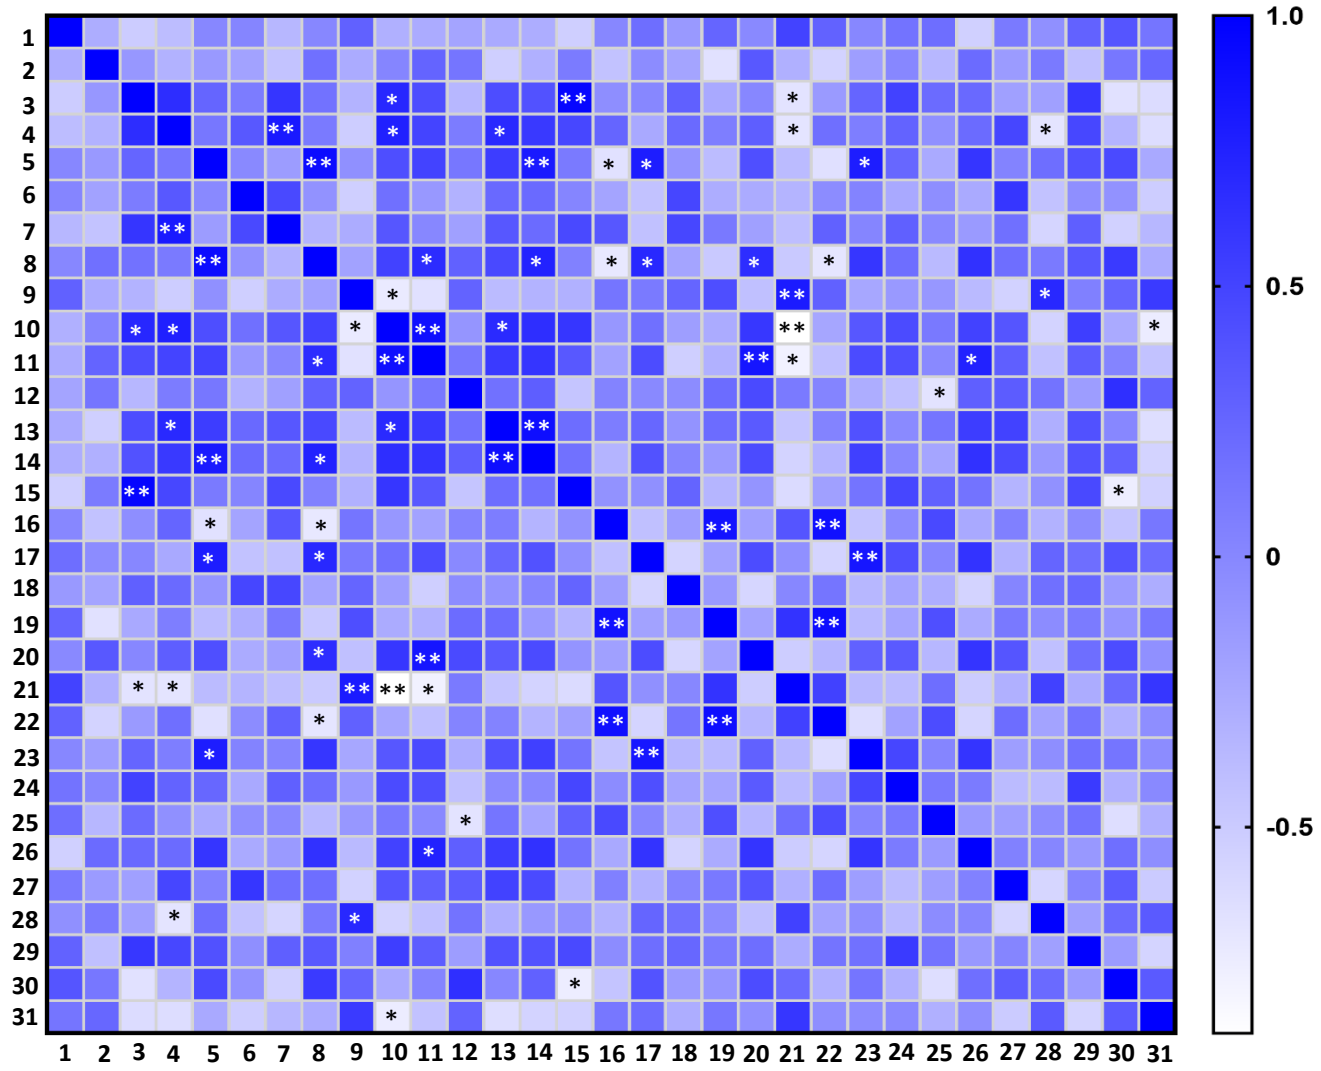



E

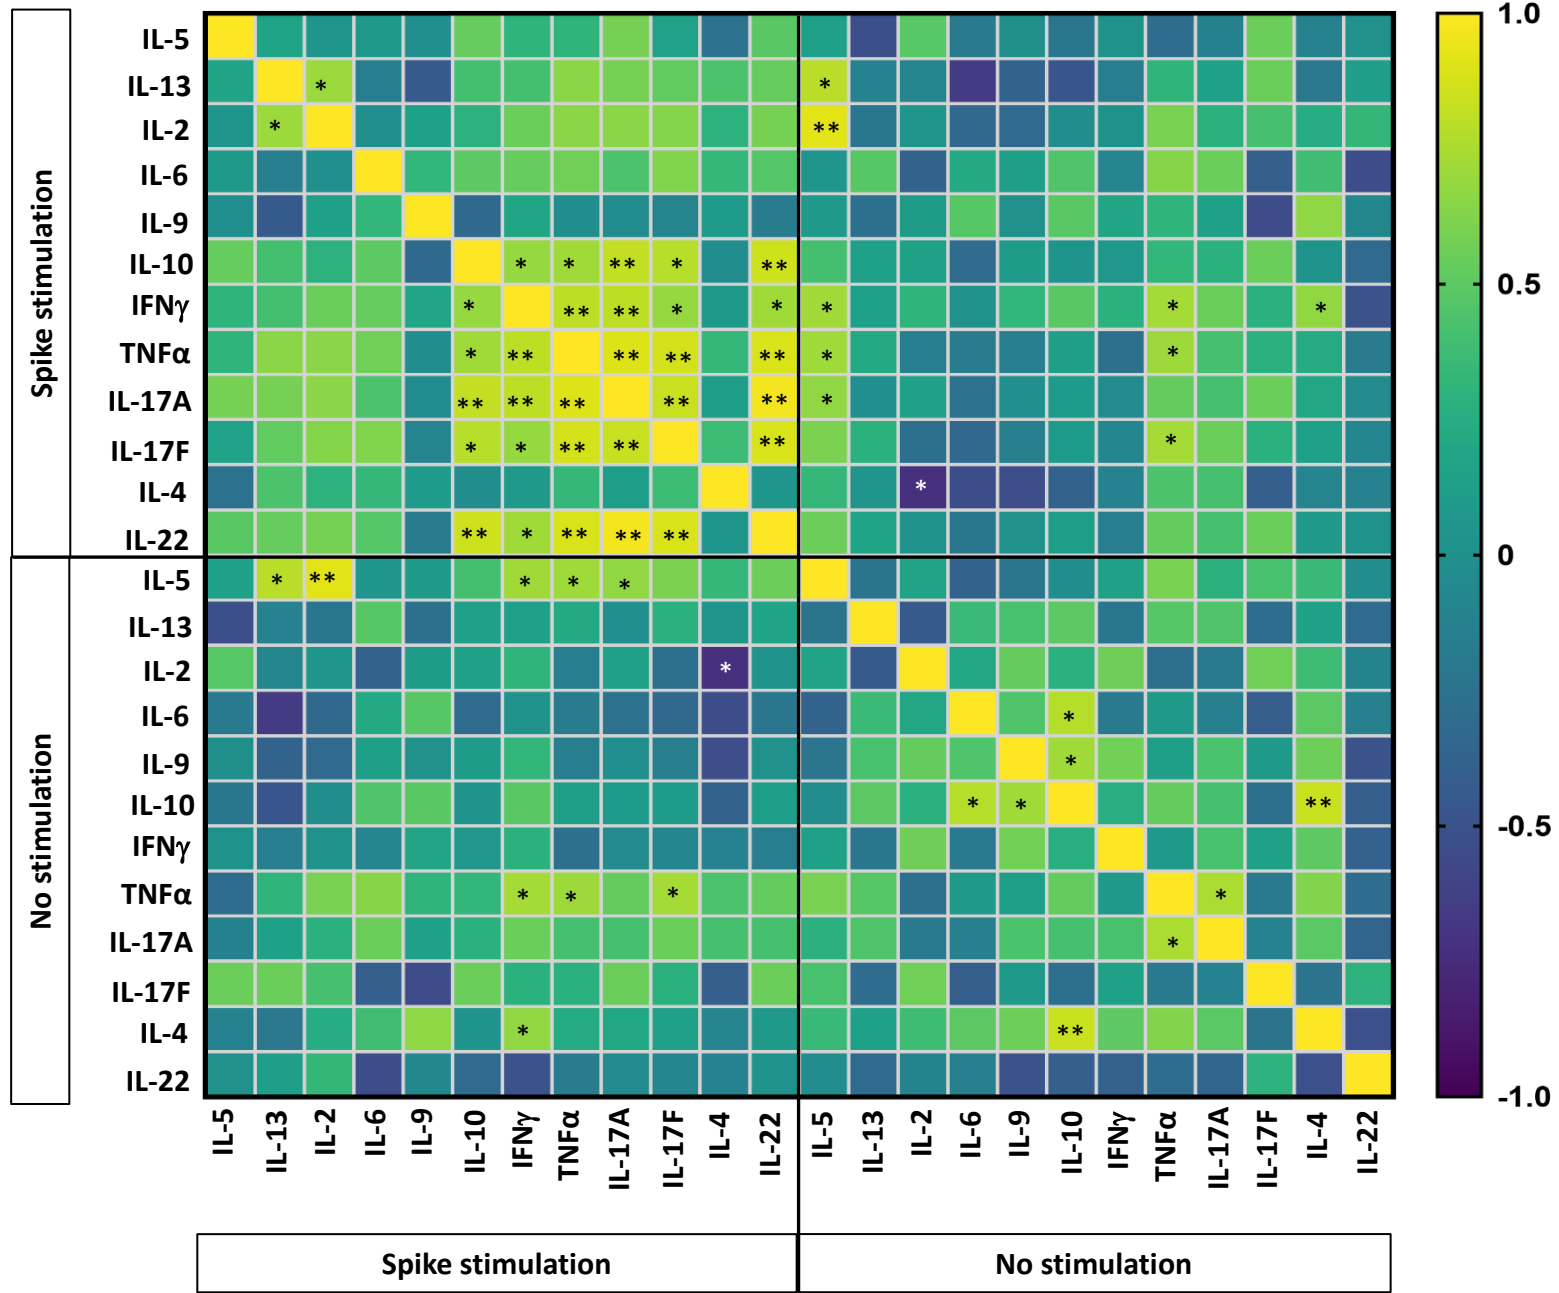



#### **Supplementary Figure 4. Correlation of specific adaptive immune responses**

Correlation analysis between demographic parameters, humoral and cellular immune responses was performed in the 9 individuals with mAb (A,C,E) (anti-IL-5 and mAb defined as treated patients) and in the 9 individuals with conventional (B;D;F) therapy. Colors indicate Spearman rank correlation coefficient R and statistical significance is indicated by \*  $p < 0.05$ , \*\*  $p < 0.01$ . Numbers in Figure 4C and FD stand for 1: Age, 2: BMI, 3: CD4+CD69+, 4: CD4+IFN $\gamma$ +, 5: CD4+Ki67+, 6: Memory-CD4+, 7: Memory-IFN $\gamma$ +CD4+, 8: Memory-Ki67+CD4+, 9: E $\dot{I}$ ector-CD4+, 10: E $\dot{I}$ ector-IFN $\gamma$ +CD4+, 11: E $\dot{I}$ ector-Ki67+CD4+, 12: Temra-CD4+, 13: Temra-IFN $\gamma$ +CD4+, 14: Temra-Ki67+CD4+, 15: CD8+CD69+, 16: CD8+IFN $\gamma$ +, 17: CD8+Ki67+, 18: Memory-CD8+, 19: Memory-IFN $\gamma$ +CD8+, 20: Memory-Ki67+CD8+, 21: E $\dot{I}$ ector-CD8+, 22: E $\dot{I}$ ector-IFN $\gamma$ +CD8+, 23: E $\dot{I}$ ector-Ki67+CD8+, 24: Temra-CD8+, 25: Temra-IFN $\gamma$ +CD8+, 26: Temra-Ki67+CD8+, 27: Perforin+CD8+, 28: Granzyme B+CD8+, 29: IFN $\gamma$ +CD16+, 30: Perforin+CD16+, 31: Granzyme B+CD16+.

**Supplementary Table 1. Characteristics of patients on monoclonal antibodies (mAb).**

| Patient   | Age | Sex | Biologics    | Other therapy        | Number of vaccinations | Last vaccination (adapted or non-adapted vaccine) (calendar year) | Known infections (calendar year) | Time since last vaccination/infection (months) |
|-----------|-----|-----|--------------|----------------------|------------------------|-------------------------------------------------------------------|----------------------------------|------------------------------------------------|
| <b>P1</b> | 52  | M   | Mepolizumab  | ICS, LABA            | 4                      | 2022 (a)                                                          | 2023                             | 4                                              |
| <b>P2</b> | 60  | M   | Mepolizumab  | ICS, LABA, LAMA      | 3                      | 2022 (na)                                                         | 2021                             | 15                                             |
| <b>P3</b> | 54  | M   | Benralizumab | ICS, LABA            | 3                      | 2022 (na)                                                         | n.d.                             | 15                                             |
| <b>P4</b> | 69  | M   | Benralizumab | ICS, LABA, LAMA      | 3                      | n.r.                                                              | 2022                             | 12                                             |
| <b>P5</b> | 67  | M   | Dupilumab    | ICS, LABA, LAMA      | 4                      | 2022 (a)                                                          | n.d.                             | 4                                              |
| <b>P6</b> | 62  | F   | Dupilumab    | ICS, LABA            | 3                      | 2021 (na)                                                         | 2021                             | 16                                             |
| <b>P7</b> | 51  | F   | Omalizumab   | ICS, LABA, LAMA      | 3                      | 2021 (na)                                                         | 2022                             | 14                                             |
| <b>P8</b> | 64  | F   | Omalizumab   | ICS, LABA            | 3                      | 2021 (na)                                                         | n.d.                             | 16                                             |
| <b>P9</b> | 83  | F   | Omalizumab   | ICS, OCS, LABA, LAMA | 3                      | 2022 (na)                                                         | n.d.                             | 13                                             |

Abbreviations: M, male; F, female; inhaled glucocorticoids, ICS; oral glucocorticoids, OCS; LABA, rapid-onset long-acting  $\beta_2$ -agonist; LAMA, long-acting muscarinic antagonist; na, non-adapted; a, adapted; adapted to omicron BA.5. n.r., not reported; n.d., not detected.

**Supplementary Table 2. Characteristics of patients on conventional therapy (conv).**

| <b>Patient</b> | <b>Age</b> | <b>Sex</b> | <b>Other therapy</b> | <b>Number of vaccinations</b> | <b>Last vaccination (adapted or non-adapted vaccine)</b> | <b>Known infections</b> | <b>Time since last vaccination/infection (months)</b> |
|----------------|------------|------------|----------------------|-------------------------------|----------------------------------------------------------|-------------------------|-------------------------------------------------------|
| <b>P10</b>     | 63         | M          | ICS, LABA, LAMA      | 3                             | 2021 (na)                                                | n.d.                    | 16                                                    |
| <b>P11</b>     | 49         | F          | ICS, LABA, LAMA      | 1                             | 2021 (na)                                                | 2022                    | 12                                                    |
| <b>P12</b>     | 52         | M          | OCS, ICS, LABA, LAMA | 3                             | 2021 (a)                                                 | 2022                    | 12                                                    |
| <b>P13</b>     | 57         | M          | ICS, LABA, LAMA      | 4                             | 2022 (a)                                                 | n.d.                    | 5                                                     |
| <b>P14</b>     | 76         | F          | OCS, ICS, LABA, LAMA | 3                             | 2022 (na)                                                | n.d.                    | 14                                                    |
| <b>P15</b>     | 59         | F          | ICS, LABA, LAMA      | 4                             | 2022 (a)                                                 | n.d.                    | 4                                                     |
| <b>P16</b>     | 25         | F          | ICS, LABA, LAMA      | 3                             | 2021 (na)                                                | 2022                    | 5                                                     |
| <b>P17</b>     | 29         | M          | OCS, ICS, LABA, LAMA | 3                             | 2022 (na)                                                | 2021                    | 12                                                    |
| <b>P18</b>     | 68         | M          | OCS, ICS, LABA, LAMA | 3                             | 2022 (na)                                                | 2022                    | 12                                                    |

Abbreviations: M, male; F, female; inhaled glucocorticoids, ICS; oral glucocorticoids, OCS; LABA, rapid-onset long-acting  $\beta_2$ -agonist; LAMA, long-acting muscarinic antagonist; na, non-adapted; a, adapted to omicron BA.5; n.r., not reported; n.d., not detected.

**Supplementary Table 3. Serum and nasal concentrations of IL-5 in treated asthma patients.**

|                           | <b>anti-IL-5</b>          |               | <b>other mAb</b>    |           | <b>conv</b>         |           |
|---------------------------|---------------------------|---------------|---------------------|-----------|---------------------|-----------|
|                           | Median (IQR)              | Min-Max       | Median (IQR)        | Min-Max   | Median (IQR)        | Min-Max   |
| <b>Serum IL-5 (pg/mL)</b> | 183.11<br>(93.05-1479.23) | 85.79-1888.50 | 0.43<br>(0.00-6.02) | 0.00-6.51 | 0.04<br>(0.00-3.67) | 0.00-6.49 |
| <b>Nasal IL-5 (pg/mL)</b> | 2.57<br>(0.74-20.92)      | 0.39-26.78    | 1.33<br>(1.24-2.02) | 1.23-2.26 | 1.44<br>(1.33-1.93) | 1.19-4.81 |

**Supplementary Table 4. Cytokine concentrations (pg/mL) in serum samples from asthma patients**

|               | anti-IL-5 |        |        |       | other mAb |      |      |       |      | conv   |      |      |      |       |       |      |      | anti-IL-5<br>median<br>(IQR) | other mAb<br>median<br>(IQR)  | conv<br>median<br>(IQR)  |                          |
|---------------|-----------|--------|--------|-------|-----------|------|------|-------|------|--------|------|------|------|-------|-------|------|------|------------------------------|-------------------------------|--------------------------|--------------------------|
|               | P1        | P2     | P3     | P4    | P5        | P6   | P7   | P8    | P9   | P10    | P11  | P12  | P13  | P14   | P15   | P16  | P17  |                              |                               |                          | P18                      |
| <b>IL-5</b>   | 1888.50   | 114.81 | 251.40 | 85.79 | 0.00      | 6.51 | 0.00 | 5.53  | 0.43 | 3.06   | 0.04 | 4.27 | 0.01 | 0.10  | 6.49  | 0.00 | 0.00 | 0.00                         | 183.11<br>(93.05-<br>1479.23) | 0.43<br>(0.00-<br>6.02)  | 0.04<br>(0.00-<br>3.67)  |
| <b>IL-4</b>   | 0.02      | 3.38   | 0.00   | 0.00  | 0.00      | 0.00 | 0.00 | 4.70  | 0.00 | 23.14  | 0.00 | 2.90 | 0.85 | 0.39  | 1.01  | 0.00 | 0.00 | 0.00                         | 0.01<br>(0.00-<br>2.54)       | 0.00<br>(0.00-<br>2.35)  | 0.39<br>(0.00-<br>1.96)  |
| <b>IL-2</b>   | 0.00      | 0.00   | 0.27   | 0.00  | 0.00      | 0.00 | 0.00 | 0.68  | 0.00 | 2.24   | 0.00 | 0.00 | 0.01 | 0.08  | 0.58  | 0.00 | 0.00 | 0.72                         | 0.00<br>(0.00-<br>0.20)       | 0.00<br>(0.00-<br>0.34)  | 0.01<br>(0.00-<br>0.65)  |
| <b>IL-6</b>   | 1.84      | 0.43   | 0.00   | 0.00  | 0.80      | 0.00 | 1.96 | 32.64 | 1.13 | 12.44  | 0.04 | 3.75 | 0.00 | 0.83  | 41.02 | 1.59 | 0.39 | 8.44                         | 0.22<br>(0.00-<br>1.49)       | 1.13<br>(0.40-<br>17.30) | 1.59<br>(0.22-<br>10.44) |
| <b>INF-γ</b>  | 0.00      | 6.62   | 1.42   | 0.03  | 0.64      | 6.59 | 0.00 | 84.79 | 0.00 | 117.28 | 1.28 | 0.38 | 1.42 | 32.27 | 32.56 | 2.86 | 1.47 | 0.00                         | 0.73<br>(0.01-<br>5.32)       | 0.64<br>(0.00-<br>45.69) | 1.47<br>(0.83-<br>32.42) |
| <b>TNF-α</b>  | 0.74      | 10.86  | 0.00   | 0.00  | 0.00      | 0.00 | 0.00 | 0.00  | 0.00 | 37.01  | 0.00 | 6.56 | 0.00 | 0.63  | 0.00  | 0.00 | 0.00 | 0.00                         | 0.37<br>(0.00-<br>8.33)       | 0.00<br>(0.00-<br>0.00)  | 0.00<br>(0.00-<br>3.60)  |
| <b>IL-9</b>   | 0.00      | 0.38   | 0.01   | 0.00  | 0.01      | 0.00 | 0.17 | 3.19  | 0.00 | 3.40   | 0.00 | 0.09 | 0.00 | 0.00  | 0.00  | 0.00 | 0.00 | 2.61                         | 0.01<br>(0.00-<br>0.29)       | 0.01<br>(0.00-<br>1.68)  | 0.00<br>(0.00-<br>1.35)  |
| <b>IL-13</b>  | 0.01      | 0.65   | 0.00   | 0.00  | 0.21      | 0.00 | 2.25 | 0.00  | 0.00 | 7.37   | 0.00 | 2.29 | 1.31 | 1.04  | 0.00  | 0.58 | 0.04 | 0.00                         | 0.01<br>(0.00-<br>0.49)       | 0.00<br>(0.00-<br>1.23)  | 0.58<br>(0.00-1<br>.80)  |
| <b>IL-10</b>  | 0.28      | 0.39   | 0.03   | 0.00  | 0.19      | 0.01 | 0.20 | 0.65  | 0.09 | 1.68   | 0.41 | 0.71 | 0.17 | 0.66  | 1.72  | 0.00 | 0.19 | 0.04                         | 0.16<br>(0.01-<br>0.36)       | 0.19<br>(0.05-<br>0.43)  | 0.41<br>(0.11-<br>1.20)  |
| <b>IL-17A</b> | 0.00      | 0.01   | 0.00   | 0.00  | 0.00      | 0.00 | 0.00 | 0.00  | 0.00 | 0.02   | 0.00 | 0.00 | 0.00 | 0.00  | 0.01  | 0.00 | 0.00 | 0.00                         | 0.00<br>(0.00-<br>0.01)       | 0.00<br>(0.00-<br>0.00)  | 0.00<br>(0.00-<br>0.01)  |
| <b>IL-17F</b> | 0.00      | 0.00   | 0.08   | 0.00  | 0.00      | 0.00 | 0.00 | 0.00  | 0.00 | 45.93  | 0.00 | 0.00 | 0.00 | 0.00  | 0.00  | 0.00 | 0.00 | 0.00                         | 0.00<br>(0.00-<br>0.06)       | 0.00<br>(0.00-<br>0.00)  | 0.00<br>(0.00-<br>0.00)  |
| <b>IL-22</b>  | 0.01      | 0.00   | 0.06   | 0.00  | 0.00      | 0.61 | 0.03 | 0.00  | 0.79 | 1.46   | 0.00 | 0.60 | 0.00 | 1.98  | 0.00  | 0.00 | 0.08 | 0.14                         | 0.01<br>(0.00-<br>0.05)       | 0.03<br>(0.00-<br>0.70)  | 0.08<br>(0.00-<br>1.03)  |

**Supplementary Table 5. Cytokine concentrations (pg/mL) in nasal swab samples from asthma patients**

|               | anti-IL-5 |       |       |       | other mAb |      |       |       |       | conv  |       |      |       |       |       |       |       | anti-IL-5<br>median<br>(IQR) | other<br>mAb<br>median<br>(IQR) | conv<br>median<br>(IQR)   |                            |
|---------------|-----------|-------|-------|-------|-----------|------|-------|-------|-------|-------|-------|------|-------|-------|-------|-------|-------|------------------------------|---------------------------------|---------------------------|----------------------------|
|               | P1        | P2    | P3    | P4    | P5        | P6   | P7    | P8    | P9    | P10   | P11   | P12  | P13   | P14   | P15   | P16   | P17   | P18                          |                                 |                           |                            |
| <b>IL-5</b>   | 3.35      | 1.79  | 26.78 | 0.39  | 1.78      | 1.33 | 1.26  | 1.23  | 2.26  | 1.19  | 1.30  | 1.41 | 1.35  | 1.96  | 4.81  | 1.88  | 1.89  | 1.44                         | 2.57<br>(0.74-<br>20.92)        | 1.33<br>(1.24-<br>2.02)   | 1.44<br>(1.33-<br>1.93)    |
| <b>IL-4</b>   | 3.40      | 2.70  | 3.76  | 1.79  | 3.55      | 2.46 | 4.08  | 4.38  | 3.12  | 1.02  | 2.25  | 3.05 | 2.91  | 5.56  | 2.07  | 4.09  | 4.13  | 2.90                         | 3.05<br>(2.02-<br>3.67)         | 3.55<br>(2.79-<br>4.23)   | 2.91<br>(2.16-<br>4.11)    |
| <b>IL-2</b>   | 0.54      | 0.35  | 1.92  | 0.05  | 3.33      | 0.93 | 4.04  | 1.34  | 2.70  | 0.00  | 1.18  | 0.05 | 1.43  | 5.30  | 1.55  | 0.89  | 4.05  | 0.00                         | 0.45<br>(0.13-<br>1.58)         | 2.70<br>(1.14-<br>3.69)   | 1.18<br>(0.03-<br>2.80)    |
| <b>IL-6</b>   | 10.39     | 94.24 | 20.61 | 12.10 | 22.07     | 0.00 | 23.51 | 10.86 | 5.23  | 43.36 | 11.41 | 0.00 | 52.81 | 25.07 | 84.72 | 24.60 | 14.15 | 277.95                       | 16.36<br>(10.82-<br>75.83)      | 10.86<br>(2.62-<br>22.79) | 25.07<br>(12.78-<br>68.77) |
| <b>INF-γ</b>  | 11.68     | 0.26  | 9.89  | 0.00  | 0.51      | 1.58 | 28.55 | 6.94  | 7.26  | 1.52  | 2.33  | 0.64 | 5.12  | 23.72 | 0.18  | 21.14 | 8.19  | 2.41                         | 5.08<br>(0.07-<br>11.23)        | 6.94<br>(1.05-<br>17.91)  | 2.41<br>(1.08-<br>14.67)   |
| <b>TNF-α</b>  | 6.87      | 0.50  | 4.16  | 0.28  | 4.70      | 0.87 | 5.10  | 6.47  | 3.11  | 2.17  | 2.55  | 0.92 | 1.65  | 6.38  | 4.95  | 3.10  | 2.20  | 15.98                        | 2.33<br>(0.34-<br>6.19)         | 4.70<br>(1.99-<br>5.79)   | 2.55<br>(1.91-<br>5.67)    |
| <b>IL-9</b>   | 1.67      | 0.14  | 27.39 | 0.16  | 0.31      | 1.25 | 3.49  | 1.31  | 1.15  | 0.32  | 1.31  | 1.03 | 1.86  | 1.39  | 1.44  | 2.23  | 1.13  | 1.03                         | 0.92<br>(0.15-<br>20.96)        | 1.25<br>(0.73-<br>2.40)   | 1.31<br>(1.03-<br>1.65)    |
| <b>IL-13</b>  | 8.81      | 0.00  | 13.52 | 2.17  | 5.87      | 3.88 | 11.15 | 12.00 | 11.55 | 4.98  | 3.18  | 7.43 | 4.60  | 13.05 | 7.70  | 8.03  | 6.63  | 4.18                         | 5.49<br>(0.54-1<br>2.34)        | 11.15<br>(4.88-<br>11.78) | 6.63<br>(4.39-<br>7.87)    |
| <b>IL-10</b>  | 2.37      | 1.89  | 2.66  | 2.08  | 1.72      | 1.38 | 1.82  | 2.79  | 2.70  | 2.71  | 1.31  | 1.95 | 2.99  | 3.86  | 3.69  | 1.78  | 3.72  | 11.38                        | 2.23<br>(1.94-<br>2.59)         | 1.82<br>(1.55-<br>2.75)   | 2.99<br>(1.87-<br>3.79)    |
| <b>IL-17A</b> | 1.36      | 1.01  | 1.26  | 0.40  | 0.98      | 0.47 | 0.72  | 0.98  | 1.38  | 0.56  | 1.41  | 0.37 | 1.46  | 1.07  | 0.70  | 1.07  | 1.60  | 0.89                         | 1.14<br>(0.55-<br>1.34)         | 0.98<br>(0.60-<br>1.18)   | 1.07<br>(0.63-<br>1.44)    |
| <b>IL-17F</b> | 0.44      | 0.30  | 0.58  | 0.30  | 0.55      | 0.52 | 0.72  | 0.52  | 0.42  | 0.33  | 0.51  | 0.52 | 0.86  | 0.64  | 0.44  | 0.79  | 0.56  | 0.35                         | 0.37<br>(0.30-<br>0.55)         | 0.52<br>(0.47-<br>0.64)   | 0.52<br>(0.40-<br>0.72)    |
| <b>IL-22</b>  | 0.59      | 0.22  | 2.68  | 0.19  | 0.24      | 0.34 | 1.20  | 0.40  | 0.60  | 0.31  | 0.71  | 0.33 | 0.46  | 0.69  | 0.88  | 0.49  | 1.10  | 0.24                         | 0.41<br>(0.20-<br>2.16)         | 0.40<br>(0.29-<br>0.90)   | 0.49<br>(0.32-<br>0.80)    |

**Supplementary Table 6. Serum and nasal concentrations of anti-IgG, RAI and anti-IgA in treated asthma patients**

|                                                            | anti-IL-5                    |                 | other mAb                  |               | conv                        |                |
|------------------------------------------------------------|------------------------------|-----------------|----------------------------|---------------|-----------------------------|----------------|
|                                                            | Median (IQR)                 | Min-Max         | Median (IQR)               | Min-Max       | Median (IQR)                | Min-Max        |
| <b>Anti-spike-SARS-CoV-2-IgG (BAU/mL)</b>                  | 1069.8<br>(99.1-2296.5)      | 35.3-2445.6     | 1177.5<br>(429.2-2054.2)   | 267.0-2769.0  | 410.7<br>(300.4-824.5)      | 86.2-1348.9    |
| <b>Anti-spike-SARS-CoV-2-IgG avidity (RAI, %)</b>          | 91.7<br>(86.5-94.8)          | 85.7-94.9       | 83.2<br>(62.0-90.1)        | 42.7-94.4     | 85.5<br>(77.5-96.6)         | 47.4-100.0     |
| <b>Anti-SARS-CoV-2-wt antibody neutralization (IC50)</b>   | 180.0<br>(73.3-392.5)        | 59.0-442.0      | 97.0<br>(64.0-134.5)       | 40.0-167.0    | 75.0<br>(55.5-138.5)        | 25.0-170.0     |
| <b>Anti-SARS-CoV-2-BA.5 antibody neutralization (IC50)</b> | 212.5<br>(100.8-397.8)       | 65.0-458.0      | 128.0<br>(36.0-183.0)      | 34.0-215.0    | 104.0<br>(33.5-156.5)       | 17.0-294.0     |
| <b>Anti-SARS-CoV-2-S1-IgA in serum (pg/mL)</b>             | 37916.8<br>(21109.1-55755.0) | 19253.8-57953.7 | 5531.8<br>(2355.8-23778.6) | 0.0-27891.7   | 14652.0<br>(3211.4-22477.2) | 1376.5-27302.1 |
| <b>Anti-SARS-CoV-2-RBD-IgA in serum (pg/mL)</b>            | 24599.6<br>(17604.4-29639.4) | 15541.0-31051.0 | 4022.6<br>(1159.2-12922.1) | 877.8-15259.8 | 8917.0<br>(3791.2-15255.5)  | 212.1-25269.7  |
| <b>Anti-SARS-CoV-2-S1-IgA nasal (pg/mL)</b>                | 114.6<br>(54.0-184.3)        | 41.8-199.6      | 30.2<br>(6.6-35.0)         | 0.1-35.9      | 34.4<br>(7.6-77.9)          | 5.0-99.9       |
| <b>Anti-SARS-CoV-2-RBD-IgA nasal (pg/mL)</b>               | 70.5<br>(36.1-72.2)          | 24.6-72.8       | 14.8<br>(3.8-21.3)         | 0.2-21.3      | 17.9<br>(10.1-53.6)         | 0.6-109.9      |

Abbreviations: wt, wild type; BA.5, Omicron variant; S1, spike protein 1; RBD, receptor binding protein

**Supplementary Table 7. Proportions of T- and B-cell subpopulations in treated asthma patients**

|                                     | anti-IL-5           |            | other mAb           |           | conv                |           |
|-------------------------------------|---------------------|------------|---------------------|-----------|---------------------|-----------|
|                                     | Median (IQR)        | Min-Max    | Median (IQR)        | Min-Max   | Median (IQR)        | Min-Max   |
| <b>CD4+ (%)</b>                     | 24.0<br>(14.5-29.3) | 12.5-29.9  | 29.4<br>(23.1-37.1) | 22.5-37.3 | 15.9<br>(14.7-24.1) | 12.9-30.5 |
| <b>CD8+ (%)</b>                     | 36.6<br>(24.4-56.3) | 23.7-59.4  | 28.0<br>(22.4-40.9) | 19.9-51.9 | 16.8<br>(10.4-23.8) | 7.8-37.0  |
| <b>CD16+ cells (%)</b>              | 14.3<br>(12.3-15.7) | 11.9-15.9  | 20.4<br>(9.9-23.8)  | 5.5-24.8  | 23.5<br>(12.3-39.0) | 12.2-62.4 |
| <b>CD19+ cells (%)</b>              | 2.0<br>(0.6-3.6)    | 0.3-3.9    | 0.6<br>(0.4-1.9)    | 0.3-2.5   | 5.4<br>(1.8-8.6)    | 0.2-12.9  |
| <b>CD138+CD19+ plasma cells (%)</b> | 0.03<br>(0.00-0.06) | 0.00-0.06  | 0.01<br>(0.00-0.02) | 0.00-0.02 | 0.07<br>(0.05-0.53) | 0.02-1.97 |
| <b>Naive CD4+ (%)</b>               | 18.9<br>(8.5-41.6)  | 5.9-48.3   | 24.5<br>(5.1-31.3)  | 0.8-35.1  | 31.4<br>(19.0-38.9) | 10.5-40.2 |
| <b>Memory CD4+ (%)</b>              | 53.2<br>(37.5-62.0) | 35.1-62.2  | 48.0<br>(27.4-54.5) | 15.7-54.6 | 47.1<br>(43.2-54.2) | 16.6-64.6 |
| <b>Effector CD4+ (%)</b>            | 18.3<br>(8.6-46.4)  | 6.5-54.7   | 28.7<br>(9.1-51.6)  | 5.5-72.9  | 10.5<br>(9.5-21.7)  | 8.1-61.6  |
| <b>Temra CD4+ (%)</b>               | 1.0<br>(0.3-3.6)    | 0.2-4.3    | 7.4<br>(5.2-11.6)   | 4.2-12.6  | 4.8<br>(2.3-7.9)    | 1.4-11.2  |
| <b>Naive CD8 (%)</b>                | 13.8<br>(4.2-30.1)  | 1.7-34.8   | 12.6<br>(3.7-41.8)  | 1.7-52.2  | 26.3<br>(19.1-48.5) | 13.5-58.0 |
| <b>Memory CD8+ (%)</b>              | 36.0<br>(17.5-49.1) | 14.0-50.8  | 24.8<br>(18.8-31.0) | 15.5-36.4 | 28.8<br>(17.4-37.9) | 9.5-44.0  |
| <b>Effector CD8+ (%)</b>            | 18.3<br>(10.6-53.1) | 10.4-62.4) | 25.0<br>(11.2-54.6) | 8.8-67.4  | 18.1<br>(9.5-19.5)  | 7.1-22.9  |
| <b>Temra CD8+ (%)</b>               | 20.9<br>(10.7-35.6) | 7.9-39.8   | 16.2<br>(14.8-34.8) | 14.3-36.7 | 20.9<br>(9.5-43.3)  | 3.9-57.0  |

**Supplementary Table 8. Proportions of activated T-cell subpopulations in treated asthma patients**

|                                                                    | anti-IL-5           |           | other mAb           |            | conv                |           |
|--------------------------------------------------------------------|---------------------|-----------|---------------------|------------|---------------------|-----------|
|                                                                    | Median (IQR)        | Min-Max   | Median (IQR)        | Min-Max    | Median (IQR)        | Min-Max   |
| <b>IFN-<math>\gamma</math>+ in CD4 (%)</b>                         | 0.14<br>(0.03-0.50) | 0.00-0.62 | 0.32<br>(0.07-0.72) | 0.05-1.07  | 0.38<br>(0.18-0.58) | 0.15-0.78 |
| <b>IFN-<math>\gamma</math>+ in CD8 (%)</b>                         | 0.07<br>(0.04-0.13) | 0.03-0.15 | 0.11<br>(0.03-0.74) | 0.00-3.22  | 0.10<br>(0.05-0.14) | 0.00-0.27 |
| <b>IFN-<math>\gamma</math>+ in naive T cells CD4 (%)</b>           | 0.00<br>(0.00-0.04) | 0.00-0.06 | 0.12<br>(0.00-0.86) | 0.00-1.36  | 0.00<br>(0.00-0.10) | 0.00-0.11 |
| <b>IFN-<math>\gamma</math>+ in central memory T cells CD4 (%)</b>  | 0.18<br>(0.05-0.56) | 0.00-0.68 | 0.06<br>(0.00-0.30) | 0.00-0.35  | 0.25<br>(0.06-0.30) | 0.00-0.90 |
| <b>IFN-<math>\gamma</math>+ in effector memory T cells CD4 (%)</b> | 0.28<br>(0.04-0.68) | 0.00-0.77 | 0.31<br>(0.00-1.69) | 0.00-2.16  | 0.38<br>(0.00-0.87) | 0.00-1.31 |
| <b>IFN-<math>\gamma</math>+ in Temra cells CD4 (%)</b>             | 0.00<br>(0.00-2.03) | 0.00-2.70 | 0.47<br>(0.00-7.40) | 0.00-12.94 | 1.90<br>(0.56-4.26) | 0.00-7.87 |
| <b>CD69+ in CD4 (%)</b>                                            | 0.38<br>(0.08-0.57) | 0.00-0.62 | 0.05<br>(0.00-0.33) | 0.00-0.42  | 0.34<br>(0.25-0.55) | 0.16-0.88 |
| <b>CD69+ in CD8 (%)</b>                                            | 0.40<br>(0.11-0.49) | 0.02-0.50 | 0.05<br>(0.00-0.19) | 0.00-0.32  | 0.18<br>(0.09-0.87) | 0.04-2.50 |
| <b>Ki67+ in CD4 (%)</b>                                            | 0.32<br>(0.28-0.95) | 0.27-1.16 | 0.97<br>(0.42-1.11) | 0.00-1.12  | 0.60<br>(0.49-0.84) | 0.42-0.92 |
| <b>Ki67+ in CD8 (%)</b>                                            | 0.47<br>(0.24-0.70) | 0.23-0.71 | 0.60<br>(0.30-1.01) | 0.16-1.22  | 0.44<br>(0.34-0.66) | 0.19-0.75 |
| <b>Perforin+ in CD8 (%)</b>                                        | 5.6<br>(2.7-9.4)    | 2.6-9.7   | 14.0<br>(5.5-30.3)  | 4.0-41.5   | 10.0<br>(4.8-12.0)  | 3.6-49.4  |
| <b>Granzyme B+ in CD8 (%)</b>                                      | 66.1<br>(60.0-75.2) | 59.5-76.7 | 60.8<br>(50.3-73.2) | 45.7-84.2  | 48.5<br>(22.7-66.0) | 5.3-80.1  |
| <b>Perforin+ in CD16 (%)</b>                                       | 57.3<br>(52.3-62.5) | 50.4-64.6 | 77.9<br>(65.2-86.8) | 59.6-90.5  | 69.9<br>(54.2-80.9) | 33.4-94.3 |
| <b>Granzyme B+ in CD16 (%)</b>                                     | 86.9<br>(83.6-88.3) | 80.7-89.3 | 87.6<br>(78.0-94.6) | 72.4-95.2  | 76.9<br>(73.6-89.1) | 61.6-98.1 |

**Supplementary Table 9. Cytokine concentrations (pg/mL) in supernatants after in vitro stimulation with spike-protein**

| anti-IL-5                      |        |         |       | other mAb |        |       |       |        | conv   |        |        |         |        |        |        |       |       |       | anti-IL-5<br>median<br>(IQR)  | other<br>mAb<br>median<br>(IQR) | conv<br>median<br>(IQR)      |
|--------------------------------|--------|---------|-------|-----------|--------|-------|-------|--------|--------|--------|--------|---------|--------|--------|--------|-------|-------|-------|-------------------------------|---------------------------------|------------------------------|
| P1                             | P2     | P3      | P4    | P5        | P6     | P7    | P8    | P9     | P10    | P11    | P12    | P13     | P14    | P15    | P16    | P17   | P18   |       |                               |                                 |                              |
| <b>IL-6</b>                    | 8336.4 | 14814.8 | 549.9 | 1738.5    | 9118.9 | 210.8 | 711.4 | 1114.6 | 7611.5 | 3494.6 | 3995.2 | 23433.2 | 2892.4 | 1713.9 | 1161.7 | 211.6 | 141.2 | 994.7 | 5037.5<br>(847.1-<br>13195.2) | 1114.7<br>(461.1-<br>8365.2)    | 1713.9<br>(603.2-<br>3744.9) |
| <b>IL-5</b>                    | 2.4    | 2.5     | 11.0  | 4.1       | 2.6    | 1.2   | 1.9   | 2.8    | 7.4    | 3.7    | 7.2    | 7.2     | 2.4    | 2.8    | 19.2   | 0.9   | 2.4   | 4.9   | 3.3<br>(2.4-9.2)              | 2.6<br>(1.5-<br>5.1)            | 3.7<br>(2.4-<br>7.2)         |
| <b>IL-4</b>                    | 1.9    | 2.0     | 1.1   | 2.1       | 1.6    | 2.0   | 1.3   | 1.0    | 1.7    | 0.9    | 5.4    | 5.1     | 1.5    | 1.5    | 3.9    | 2.8   | 2.1   | 1.1   | 2.0<br>(1.3-2.1)              | 1.6<br>(1.2-<br>1.9)            | 2.1<br>(1.3-<br>4.1)         |
| <b>IFN<math>\gamma</math></b>  | 842.0  | 1093.3  | 677.2 | 265.5     | 213.9  | 124.3 | 176.3 | 424.3  | 185.4  | 187.9  | 441.9  | 288.4   | 548.9  | 137.7  | 380.5  | 295.2 | 239.6 | 316.4 | 759.6<br>(368.4-<br>1030.5)   | 185.4<br>(150.3-<br>319.1)      | 295.2<br>(213.8-<br>411.2)   |
| <b>TNF-<math>\alpha</math></b> | 366.1  | 79.7    | 51.5  | 30.7      | 16.6   | 5.1   | 16.1  | 14.9   | 18.7   | 28.1   | 60.1   | 54.9    | 59.5   | 10.2   | 24.2   | 20.2  | 13.0  | 25.2  | 65.6<br>(35.9-<br>294.5)      | 16.1<br>(10.0-<br>17.7)         | 25.2<br>(16.6-<br>57.2)      |
| <b>IL-9</b>                    | 91.3   | 86.7    | 24.5  | 48.6      | 47.7   | 80.2  | 33.8  | 164.2  | 93.9   | 49.4   | 42.7   | 34.9    | 47.6   | 44.8   | 30.1   | 74.8  | 72.1  | 21.6  | 67.7<br>(30.6-<br>90.1)       | 80.2<br>(40.7-<br>129.1)        | 44.8<br>(32.5-<br>60.8)      |
| <b>IL-13</b>                   | 8.5    | 5.0     | 10.1  | 8.8       | 1.6    | 4.4   | 4.3   | 0.2    | 3.3    | 3.6    | 23.2   | 15.4    | 4.4    | 6.2    | 9.5    | 3.8   | 1.9   | 3.8   | 8.7<br>(5.9-9.7)              | 3.3<br>(0.9-<br>4.4)            | 4.4<br>(3.7-<br>12.4)        |
| <b>IL-10</b>                   | 13.0   | 27.3    | 45.9  | 8.7       | 30.8   | 1.8   | 2.0   | 2.8    | 6.5    | 3.0    | 4.7    | 18.1    | 14.3   | 3.5    | 10.7   | 4.8   | 2.5   | 4.3   | 20.2<br>(9.8-<br>41.3)        | 2.8<br>(1.9-<br>18.7)           | 4.7<br>(3.2-<br>12.5)        |
| <b>IL-17A</b>                  | 0.5    | 1.2     | 3.3   | 0.4       | 0.3    | 0.1   | 0.3   | 0.3    | 0.4    | 0.7    | 1.7    | 1.1     | 0.7    | 0.2    | 0.6    | 0.3   | 0.4   | 0.5   | 0.9<br>(0.4-2.8)              | 0.3<br>(0.2-<br>0.4)            | 0.6<br>(0.4-<br>0.9)         |
| <b>IL-17F</b>                  | 5.7    | 6.8     | 5.3   | 4.0       | 4.7    | 3.3   | 3.1   | 2.6    | 4.6    | 1.1    | 5.4    | 10.5    | 5.1    | 3.5    | 4.7    | 3.9   | 4.1   | 4.3   | 5.5<br>(4.3-6.5)              | 3.3<br>(2.9-<br>4.6)            | 4.3<br>(3.7-<br>5.3)         |
| <b>IL-22</b>                   | 12.2   | 15.6    | 23.2  | 2.5       | 5.0    | 1.1   | 1.8   | 1.4    | 7.0    | 4.4    | 14.0   | 16.5    | 6.9    | 2.0    | 18.8   | 1.4   | 1.3   | 3.1   | 13.9<br>(4.9-<br>21.3)        | 1.8<br>(1.2-<br>6.0)            | 4.4<br>(1.7-<br>15.2)        |

**Supplementary Table 10. Correlation coefficient and significance (Sig.) of immunity parameters in patients on mAb**

|                               | Age    | BMI    | IL-5   | IL-13   | IL-2   | IL-6   | IL-9   | IL-10   | IFN $\gamma$ | TNF $\alpha$ | IL-17A  | IL-17F  | IL-4   | IL-22   |
|-------------------------------|--------|--------|--------|---------|--------|--------|--------|---------|--------------|--------------|---------|---------|--------|---------|
| <b>Age</b>                    | 1.000  | -0.283 | 0.500  | -0.333  | -0.350 | 0.217  | 0.367  | -0.017  | -0.233       | -0.217       | -0.083  | -0.167  | 0.233  | -0.183  |
| <i>Sig.</i>                   |        | 0.460  | 0.170  | 0.381   | 0.356  | 0.576  | 0.332  | 0.966   | 0.546        | 0.576        | 0.831   | 0.668   | 0.546  | 0.637   |
| <b>BMI</b>                    | -0.283 | 1.000  | -0.267 | 0.017   | 0.083  | 0.233  | 0.250  | -0.350  | 0.067        | 0.233        | 0.050   | 0.017   | 0.250  | 0.067   |
| <i>Sig.</i>                   | 0.460  |        | 0.488  | 0.966   | 0.831  | 0.546  | 0.516  | 0.356   | 0.865        | 0.546        | 0.898   | 0.966   | 0.516  | 0.865   |
| <b>IL-5</b>                   | 0.500  | -0.267 | 1.000  | 0.167   | 0.050  | 0.067  | -0.017 | 0.533   | 0.300        | 0.300        | 0.583   | 0.150   | -0.250 | 0.483   |
| <i>Sig.</i>                   | 0.170  | 0.488  |        | 0.668   | 0.898  | 0.865  | 0.966  | 0.139   | 0.433        | 0.433        | 0.099   | 0.700   | 0.516  | 0.187   |
| <b>IL-13</b>                  | -0.333 | 0.017  | 0.167  | 1.000   | 0.700* | -0.150 | -0.450 | 0.400   | 0.400        | 0.650        | 0.583   | 0.517   | 0.433  | 0.533   |
| <i>Sig.</i>                   | 0.381  | 0.966  | 0.668  |         | 0.036  | 0.700  | 0.224  | 0.286   | 0.286        | 0.058        | 0.099   | 0.154   | 0.244  | 0.139   |
| <b>IL-2</b>                   | -0.350 | 0.083  | 0.050  | 0.700*  | 1.000  | -0.017 | 0.133  | 0.283   | 0.550        | 0.650        | 0.650   | 0.633   | 0.283  | 0.583   |
| <i>Sig.</i>                   | 0.356  | 0.831  | 0.898  | 0.036   |        | 0.966  | 0.732  | 0.460   | 0.125        | 0.058        | 0.058   | 0.067   | 0.460  | 0.099   |
| <b>IL-6</b>                   | 0.217  | 0.233  | 0.067  | -0.150  | -0.017 | 1.000  | 0.317  | 0.500   | 0.533        | 0.567        | 0.433   | 0.617   | 0.333  | 0.467   |
| <i>Sig.</i>                   | 0.576  | 0.546  | 0.865  | 0.700   | 0.966  |        | 0.406  | 0.170   | 0.139        | 0.112        | 0.244   | 0.077   | 0.381  | 0.205   |
| <b>IL-9</b>                   | 0.367  | 0.250  | -0.017 | -0.450  | 0.133  | 0.317  | 1.000  | -0.333  | 0.183        | -0.033       | -0.050  | -0.100  | 0.083  | -0.183  |
| <i>Sig.</i>                   | 0.332  | 0.516  | 0.966  | 0.224   | 0.732  | 0.406  |        | 0.381   | 0.637        | 0.932        | 0.898   | 0.798   | 0.831  | 0.637   |
| <b>IL-10</b>                  | -0.017 | -0.350 | 0.533  | 0.400   | 0.283  | 0.500  | -0.333 | 1.000   | 0.683*       | 0.717*       | 0.817** | 0.783*  | -0.033 | 0.850** |
| <i>Sig.</i>                   | 0.966  | 0.356  | 0.139  | 0.286   | 0.460  | 0.170  | 0.381  |         | 0.042        | 0.030        | 0.007   | 0.013   | 0.932  | 0.004   |
| <b>IFN<math>\gamma</math></b> | -0.233 | 0.067  | 0.300  | 0.400   | 0.550  | 0.533  | 0.183  | 0.683*  | 1.000        | 0.800**      | 0.800** | 0.683*  | 0.067  | 0.717*  |
| <i>Sig.</i>                   | 0.546  | 0.865  | 0.433  | 0.286   | 0.125  | 0.139  | 0.637  | 0.042   |              | 0.010        | 0.010   | 0.042   | 0.865  | 0.030   |
| <b>TNF<math>\alpha</math></b> | -0.217 | 0.233  | 0.300  | 0.650   | 0.650  | 0.567  | -0.033 | 0.717*  | 0.800**      | 1.000        | 0.900** | 0.867** | 0.333  | 0.883** |
| <i>Sig.</i>                   | 0.576  | 0.546  | 0.433  | 0.058   | 0.058  | 0.112  | 0.932  | 0.030   | 0.010        |              | 0.001   | 0.002   | 0.381  | 0.002   |
| <b>IL-17A</b>                 | -0.083 | 0.050  | 0.583  | 0.583   | 0.650  | 0.433  | -0.050 | 0.817** | 0.800**      | 0.900**      | 1.000   | 0.833** | 0.100  | 0.967** |
| <i>Sig.</i>                   | 0.831  | 0.898  | 0.099  | 0.099   | 0.058  | 0.244  | 0.898  | 0.007   | 0.010        | 0.001        |         | 0.005   | 0.798  | 0.000   |
| <b>IL-17F</b>                 | -0.167 | 0.017  | 0.150  | 0.517   | 0.633  | 0.617  | -0.100 | 0.783*  | 0.683*       | 0.867**      | 0.833** | 1.000   | 0.367  | 0.883** |
| <i>Sig.</i>                   | 0.668  | 0.966  | 0.700  | 0.154   | 0.067  | 0.077  | 0.798  | 0.013   | 0.042        | 0.002        | 0.005   |         | 0.332  | 0.002   |
| <b>IL-4</b>                   | 0.233  | 0.250  | -0.250 | 0.433   | 0.283  | 0.333  | 0.083  | -0.033  | 0.067        | 0.333        | 0.100   | 0.367   | 1.000  | 0.050   |
| <i>Sig.</i>                   | 0.546  | 0.516  | 0.516  | 0.244   | 0.460  | 0.381  | 0.831  | 0.932   | 0.865        | 0.381        | 0.798   | 0.332   |        | 0.898   |
| <b>IL-22</b>                  | -0.183 | 0.067  | 0.483  | 0.533   | 0.583  | 0.467  | -0.183 | 0.850** | 0.717*       | 0.883**      | 0.967** | 0.883** | 0.050  | 1.000   |
| <i>Sig.</i>                   | 0.637  | 0.865  | 0.187  | 0.139   | 0.099  | 0.205  | 0.637  | 0.004   | 0.030        | 0.002        | 0.000   | 0.002   | 0.898  |         |
| <b>CD19+<br/>CD138+</b>       | -0.186 | -0.407 | 0.102  | 0.356   | 0.492  | 0.170  | -0.339 | 0.678*  | 0.373        | 0.390        | 0.559   | 0.746*  | 0.051  | 0.644   |
| <i>Sig.</i>                   | 0.631  | 0.277  | 0.795  | 0.347   | 0.179  | 0.663  | 0.372  | 0.045   | 0.323        | 0.300        | 0.117   | 0.021   | 0.897  | 0.061   |
| <b>anti-S1-IgA<br/>serum</b>  | -0.417 | 0.333  | -0.133 | 0.783*  | 0.417  | -0.267 | -0.317 | -0.083  | 0.100        | 0.400        | 0.150   | 0.083   | 0.417  | 0.100   |
| <i>Sig.</i>                   | 0.265  | 0.381  | 0.732  | 0.013   | 0.265  | 0.488  | 0.406  | 0.831   | 0.798        | 0.286        | 0.700   | 0.831   | 0.265  | 0.798   |
| <b>anti-RBD-IgA<br/>serum</b> | -0.350 | 0.233  | -0.083 | 0.867** | 0.500  | 0.167  | -0.350 | 0.333   | 0.450        | 0.700*       | 0.450   | 0.517   | 0.633  | 0.417   |
| <i>Sig.</i>                   | 0.356  | 0.546  | 0.831  | 0.002   | 0.170  | 0.668  | 0.356  | 0.381   | 0.224        | 0.036        | 0.224   | 0.154   | 0.067  | 0.265   |
| <b>anti-S1-IgA</b>            | -0.350 | 0.483  | 0.117  | 0.750*  | 0.617  | 0.233  | 0.000  | 0.283   | 0.633        | 0.817**      | 0.617   | 0.483   | 0.417  | 0.533   |

|                           |         |        |        |        |         |        |        |       |       |        |        |        |        |       |
|---------------------------|---------|--------|--------|--------|---------|--------|--------|-------|-------|--------|--------|--------|--------|-------|
| <b>nasal</b>              |         |        |        |        |         |        |        |       |       |        |        |        |        |       |
| <i>Sig.</i>               | 0.356   | 0.187  | 0.765  | 0.020  | 0.077   | 0.546  | 1.000  | 0.460 | 0.067 | 0.007  | 0.077  | 0.187  | 0.265  | 0.139 |
| <b>anti-RBD-IgA nasal</b> | -0.250  | 0.467  | 0.183  | 0.767* | 0.533   | 0.200  | -0.050 | 0.267 | 0.583 | 0.767* | 0.583  | 0.417  | 0.467  | 0.483 |
| <i>Sig.</i>               | 0.516   | 0.205  | 0.637  | 0.016  | 0.139   | 0.606  | 0.898  | 0.488 | 0.099 | 0.016  | 0.099  | 0.265  | 0.205  | 0.187 |
| <b>anti-spike-IgG</b>     | 0.233   | -0.067 | -0.283 | -0.350 | 0.017   | 0.767* | 0.433  | 0.217 | 0.183 | 0.217  | 0.067  | 0.467  | 0.317  | 0.133 |
| <i>Sig.</i>               | 0.546   | 0.865  | 0.460  | 0.356  | 0.966   | 0.016  | 0.244  | 0.576 | 0.637 | 0.576  | 0.865  | 0.205  | 0.406  | 0.732 |
| <b>RAI</b>                | -0.150  | -0.200 | 0.200  | 0.733* | 0.517   | -0.483 | -0.250 | 0.100 | 0.283 | 0.167  | 0.267  | 0.067  | 0.233  | 0.117 |
| <i>Sig.</i>               | 0.700   | 0.606  | 0.606  | 0.025  | 0.154   | 0.187  | 0.516  | 0.798 | 0.460 | 0.668  | 0.488  | 0.865  | 0.546  | 0.765 |
| <b>IC50 wt</b>            | -0.750* | 0.117  | -0.300 | 0.533  | 0.833** | -0.300 | -0.033 | 0.033 | 0.350 | 0.350  | 0.317  | 0.350  | -0.033 | 0.317 |
| <i>Sig.</i>               | 0.020   | 0.765  | 0.433  | 0.139  | 0.005   | 0.433  | 0.932  | 0.932 | 0.356 | 0.356  | 0.406  | 0.356  | 0.932  | 0.406 |
| <b>IC50 BA.5</b>          | -0.100  | 0.183  | 0.100  | 0.367  | 0.883** | 0.317  | 0.483  | 0.283 | 0.600 | 0.650  | 0.667* | 0.683* | 0.283  | 0.600 |
| <i>Sig.</i>               | 0.798   | 0.637  | 0.798  | 0.332  | 0.002   | 0.406  | 0.187  | 0.460 | 0.088 | 0.058  | 0.050  | 0.042  | 0.460  | 0.088 |

**Supplementary Table 10 (continued). Correlation coefficient and significance (Sig.) of immunity parameters in patients on mAb**

|                               | <b>CD19+<br/>CD138+</b> | <b>anti-S1-IgA<br/>serum</b> | <b>anti-RBD-IgA<br/>serum</b> | <b>anti-S1-IgA<br/>nasal</b> | <b>anti-RBD-IgA<br/>nasal</b> | <b>anti-spike-IgG</b> | <b>RAI</b> | <b>IC50 wt</b> | <b>IC50 BA.5</b> |
|-------------------------------|-------------------------|------------------------------|-------------------------------|------------------------------|-------------------------------|-----------------------|------------|----------------|------------------|
| <b>Age</b>                    | -0.186                  | -0.417                       | -0.350                        | -0.350                       | -0.250                        | 0.233                 | -0.150     | -0.750*        | -0.100           |
| <i>Sig.</i>                   | 0.631                   | 0.265                        | 0.356                         | 0.356                        | 0.516                         | 0.546                 | 0.700      | 0.020          | 0.798            |
| <b>BMI</b>                    | -0.407                  | 0.333                        | 0.233                         | 0.483                        | 0.467                         | -0.067                | -0.200     | 0.117          | 0.183            |
| <i>Sig.</i>                   | 0.277                   | 0.381                        | 0.546                         | 0.187                        | 0.205                         | 0.865                 | 0.606      | 0.765          | 0.637            |
| <b>IL-5</b>                   | 0.102                   | -0.133                       | -0.083                        | 0.117                        | 0.183                         | -0.283                | 0.200      | -0.300         | 0.100            |
| <i>Sig.</i>                   | 0.795                   | 0.732                        | 0.831                         | 0.765                        | 0.637                         | 0.460                 | 0.606      | 0.433          | 0.798            |
| <b>IL-13</b>                  | 0.356                   | 0.783*                       | 0.867**                       | 0.750*                       | 0.767*                        | -0.350                | 0.733*     | 0.533          | 0.367            |
| <i>Sig.</i>                   | 0.347                   | 0.013                        | 0.002                         | 0.020                        | 0.016                         | 0.356                 | 0.025      | 0.139          | 0.332            |
| <b>IL-2</b>                   | 0.492                   | 0.417                        | 0.500                         | 0.617                        | 0.533                         | 0.017                 | 0.517      | 0.833**        | 0.883**          |
| <i>Sig.</i>                   | 0.179                   | 0.265                        | 0.170                         | 0.077                        | 0.139                         | 0.966                 | 0.154      | 0.005          | 0.002            |
| <b>IL-6</b>                   | 0.170                   | -0.267                       | 0.167                         | 0.233                        | 0.200                         | 0.767*                | -0.483     | -0.300         | 0.317            |
| <i>Sig.</i>                   | 0.663                   | 0.488                        | 0.668                         | 0.546                        | 0.606                         | 0.016                 | 0.187      | 0.433          | 0.406            |
| <b>IL-9</b>                   | -0.339                  | -0.317                       | -0.350                        | 0.000                        | -0.050                        | 0.433                 | -0.250     | -0.033         | 0.483            |
| <i>Sig.</i>                   | 0.372                   | 0.406                        | 0.356                         | 1.000                        | 0.898                         | 0.244                 | 0.516      | 0.932          | 0.187            |
| <b>IL-10</b>                  | 0.678*                  | -0.083                       | 0.333                         | 0.283                        | 0.267                         | 0.217                 | 0.100      | 0.033          | 0.283            |
| <i>Sig.</i>                   | 0.045                   | 0.831                        | 0.381                         | 0.460                        | 0.488                         | 0.576                 | 0.798      | 0.932          | 0.460            |
| <b>IFN<math>\gamma</math></b> | 0.373                   | 0.100                        | 0.450                         | 0.633                        | 0.583                         | 0.183                 | 0.283      | 0.350          | 0.600            |
| <i>Sig.</i>                   | 0.323                   | 0.798                        | 0.224                         | 0.067                        | 0.099                         | 0.637                 | 0.460      | 0.356          | 0.088            |
| <b>TNF<math>\alpha</math></b> | 0.390                   | 0.400                        | 0.700*                        | 0.817**                      | 0.767*                        | 0.217                 | 0.167      | 0.350          | 0.650            |
| <i>Sig.</i>                   | 0.300                   | 0.286                        | 0.036                         | 0.007                        | 0.016                         | 0.576                 | 0.668      | 0.356          | 0.058            |
| <b>IL-17A</b>                 | 0.559                   | 0.150                        | 0.450                         | 0.617                        | 0.583                         | 0.067                 | 0.267      | 0.317          | 0.667*           |
| <i>Sig.</i>                   | 0.117                   | 0.700                        | 0.224                         | 0.077                        | 0.099                         | 0.865                 | 0.488      | 0.406          | 0.050            |
| <b>IL-17F</b>                 | 0.746*                  | 0.083                        | 0.517                         | 0.483                        | 0.417                         | 0.467                 | 0.067      | 0.350          | 0.683*           |
| <i>Sig.</i>                   | 0.021                   | 0.831                        | 0.154                         | 0.187                        | 0.265                         | 0.205                 | 0.865      | 0.356          | 0.042            |
| <b>IL-4</b>                   | 0.051                   | 0.417                        | 0.633                         | 0.417                        | 0.467                         | 0.317                 | 0.233      | -0.033         | 0.283            |
| <i>Sig.</i>                   | 0.897                   | 0.265                        | 0.067                         | 0.265                        | 0.205                         | 0.406                 | 0.546      | 0.932          | 0.460            |

|                                     |        |         |         |         |         |        |        |        |       |
|-------------------------------------|--------|---------|---------|---------|---------|--------|--------|--------|-------|
| <b>IL-22</b>                        | 0.644  | 0.100   | 0.417   | 0.533   | 0.483   | 0.133  | 0.117  | 0.317  | 0.600 |
| <i>Sig.</i>                         | 0.061  | 0.798   | 0.265   | 0.139   | 0.187   | 0.732  | 0.765  | 0.406  | 0.088 |
| <b>CD19+</b><br><b>CD138+</b>       | 1.000  | -0.237  | 0.136   | -0.051  | -0.102  | 0.254  | 0.220  | 0.390  | 0.441 |
| <i>Sig.</i>                         |        | 0.539   | 0.728   | 0.897   | 0.795   | 0.509  | 0.569  | 0.300  | 0.235 |
| <b>anti-S1-IgA</b><br><b>serum</b>  | -0.237 | 1.000   | 0.833** | 0.783*  | 0.800** | -0.433 | 0.500  | 0.417  | 0.083 |
| <i>Sig.</i>                         | 0.539  |         | 0.005   | 0.013   | 0.010   | 0.244  | 0.170  | 0.265  | 0.831 |
| <b>anti-RBD-IgA</b><br><b>serum</b> | 0.136  | 0.833** | 1.000   | 0.850** | 0.867** | -0.100 | 0.500  | 0.350  | 0.250 |
| <i>Sig.</i>                         | 0.728  | 0.005   |         | 0.004   | 0.002   | 0.798  | 0.170  | 0.356  | 0.516 |
| <b>anti-S1-IgA</b><br><b>nasal</b>  | -0.051 | 0.783*  | 0.850** | 1.000   | 0.983** | -0.150 | 0.400  | 0.433  | 0.483 |
| <i>Sig.</i>                         | 0.897  | 0.013   | 0.004   |         | 0.000   | 0.700  | 0.286  | 0.244  | 0.187 |
| <b>anti-RBD-IgA</b><br><b>nasal</b> | -0.102 | 0.800** | 0.867** | 0.983** | 1.000   | -0.233 | 0.467  | 0.317  | 0.383 |
| <i>Sig.</i>                         | 0.795  | 0.010   | 0.002   | 0.000   |         | 0.546  | 0.205  | 0.406  | 0.308 |
| <b>anti-spike-IgG</b>               | 0.254  | -0.433  | -0.100  | -0.150  | -0.233  | 1.000  | -0.600 | -0.150 | 0.350 |
| <i>Sig.</i>                         | 0.509  | 0.244   | 0.798   | 0.700   | 0.546   |        | 0.088  | 0.700  | 0.356 |
| <b>RAI</b>                          | 0.220  | 0.500   | 0.500   | 0.400   | 0.467   | -0.600 | 1.000  | 0.433  | 0.183 |
| <i>Sig.</i>                         | 0.569  | 0.170   | 0.170   | 0.286   | 0.205   | 0.088  |        | 0.244  | 0.637 |
| <b>IC50 wt</b>                      | 0.390  | 0.417   | 0.350   | 0.433   | 0.317   | -0.150 | 0.433  | 1.000  | 0.617 |
| <i>Sig.</i>                         | 0.300  | 0.265   | 0.356   | 0.244   | 0.406   | 0.700  | 0.244  |        | 0.077 |
| <b>IC50 BA.5</b>                    | 0.441  | 0.083   | 0.250   | 0.483   | 0.383   | 0.350  | 0.183  | 0.617  | 1.000 |
| <i>Sig.</i>                         | 0.235  | 0.831   | 0.516   | 0.187   | 0.308   | 0.356  | 0.637  | 0.077  |       |

Notes to supplementary table 10: Significance is given by \* p<0.05 and \*\*p<0.01 (Spearman rank correlation).

**Supplementary Table 11. Correlation coefficient and significance (Sig.) of immunity parameters in patients on conv.**

|                               | Age    | BMI     | IL-5     | IL-13  | IL-2    | IL-6   | IL-9     | IL-10   | IFN $\gamma$ | TNF $\alpha$ | IL-17A  | IL-17F  | IL-4   | IL-22  |
|-------------------------------|--------|---------|----------|--------|---------|--------|----------|---------|--------------|--------------|---------|---------|--------|--------|
| <b>Age</b>                    | 1.000  | -0.500  | 0.283    | -0.017 | -0.200  | 0.183  | -0.533   | -0.183  | -0.267       | -0.133       | -0.167  | -0.300  | -0.567 | 0.167  |
| <i>Sig.</i>                   |        | 0.170   | 0.460    | 0.966  | 0.606   | 0.637  | 0.139    | 0.637   | 0.488        | 0.732        | 0.668   | 0.433   | 0.112  | 0.668  |
| <b>BMI</b>                    | -0.500 | 1.000   | -0.283   | -0.200 | -0.300  | 0.283  | 0.567    | -0.067  | -0.217       | 0.317        | 0.283   | -0.133  | 0.000  | -0.167 |
| <i>Sig.</i>                   | 0.170  |         | 0.460    | 0.606  | 0.433   | 0.460  | 0.112    | 0.865   | 0.576        | 0.406        | 0.460   | 0.732   | 1.000  | 0.668  |
| <b>IL-5</b>                   | 0.283  | -0.283  | 1.000    | 0.583  | 0.500   | 0.467  | -0.800** | 0.200   | 0.200        | 0.350        | 0.517   | 0.467   | 0.433  | 0.767* |
| <i>Sig.</i>                   | 0.460  | 0.460   |          | 0.099  | 0.170   | 0.205  | 0.010    | 0.606   | 0.606        | 0.356        | 0.154   | 0.205   | 0.244  | 0.016  |
| <b>IL-13</b>                  | -0.017 | -0.200  | 0.583    | 1.000  | 0.617   | 0.650  | -0.500   | 0.667*  | 0.400        | 0.450        | 0.517   | 0.683*  | 0.750* | 0.733* |
| <i>Sig.</i>                   | 0.966  | 0.606   | 0.099    |        | 0.077   | 0.058  | 0.170    | 0.050   | 0.286        | 0.224        | 0.154   | 0.042   | 0.020  | 0.025  |
| <b>IL-2</b>                   | -0.200 | -0.300  | 0.500    | 0.617  | 1.000   | 0.333  | -0.583   | 0.800** | 0.650        | 0.500        | 0.600   | 0.933** | 0.583  | 0.733* |
| <i>Sig.</i>                   | 0.606  | 0.433   | 0.170    | 0.077  |         | 0.381  | 0.099    | 0.010   | 0.058        | 0.170        | 0.088   | 0.000   | 0.099  | 0.025  |
| <b>IL-6</b>                   | 0.183  | 0.283   | 0.467    | 0.650  | 0.333   | 1.000  | -0.317   | 0.433   | 0.117        | 0.733*       | 0.783*  | 0.467   | 0.250  | 0.700* |
| <i>Sig.</i>                   | 0.637  | 0.460   | 0.205    | 0.058  | 0.381   |        | 0.406    | 0.244   | 0.765        | 0.025        | 0.013   | 0.205   | 0.516  | 0.036  |
| <b>IL-9</b>                   | -0.533 | 0.567   | -0.800** | -0.500 | -0.583  | -0.317 | 1.000    | -0.350  | -0.317       | -0.283       | -0.333  | -0.517  | -0.167 | -0.650 |
| <i>Sig.</i>                   | 0.139  | 0.112   | 0.010    | 0.170  | 0.099   | 0.406  |          | 0.356   | 0.406        | 0.460        | 0.381   | 0.154   | 0.668  | 0.058  |
| <b>IL-10</b>                  | -0.183 | -0.067  | 0.200    | 0.667* | 0.800** | 0.433  | -0.350   | 1.000   | 0.600        | 0.500        | 0.483   | 0.733*  | 0.467  | 0.683* |
| <i>Sig.</i>                   | 0.637  | 0.865   | 0.606    | 0.050  | 0.010   | 0.244  | 0.356    |         | 0.088        | 0.170        | 0.187   | 0.025   | 0.205  | 0.042  |
| <b>IFN<math>\gamma</math></b> | -0.267 | -0.217  | 0.200    | 0.400  | 0.650   | 0.117  | -0.317   | 0.600   | 1.000        | 0.650        | 0.550   | 0.683*  | 0.300  | 0.500  |
| <i>Sig.</i>                   | 0.488  | 0.576   | 0.606    | 0.286  | 0.058   | 0.765  | 0.406    | 0.088   |              | 0.058        | 0.125   | 0.042   | 0.433  | 0.170  |
| <b>TNF<math>\alpha</math></b> | -0.133 | 0.317   | 0.350    | 0.450  | 0.500   | 0.733* | -0.283   | 0.500   | 0.650        | 1.000        | 0.950** | 0.667*  | 0.200  | 0.650  |
| <i>Sig.</i>                   | 0.732  | 0.406   | 0.356    | 0.224  | 0.170   | 0.025  | 0.460    | 0.170   | 0.058        |              | 0.000   | 0.050   | 0.606  | 0.058  |
| <b>IL-17A</b>                 | -0.167 | 0.283   | 0.517    | 0.517  | 0.600   | 0.783* | -0.333   | 0.483   | 0.550        | 0.950**      | 1.000   | 0.733*  | 0.350  | 0.750* |
| <i>Sig.</i>                   | 0.668  | 0.460   | 0.154    | 0.154  | 0.088   | 0.013  | 0.381    | 0.187   | 0.125        | 0.000        |         | 0.025   | 0.356  | 0.020  |
| <b>IL-17F</b>                 | -0.300 | -0.133  | 0.467    | 0.683* | 0.933** | 0.467  | -0.517   | 0.733*  | 0.683*       | 0.667*       | 0.733*  | 1.000   | 0.650  | 0.667* |
| <i>Sig.</i>                   | 0.433  | 0.732   | 0.205    | 0.042  | 0.000   | 0.205  | 0.154    | 0.025   | 0.042        | 0.050        | 0.025   |         | 0.058  | 0.050  |
| <b>IL-4</b>                   | -0.567 | 0.000   | 0.433    | 0.750* | 0.583   | 0.250  | -0.167   | 0.467   | 0.300        | 0.200        | 0.350   | 0.650   | 1.000  | 0.417  |
| <i>Sig.</i>                   | 0.112  | 1.000   | 0.244    | 0.020  | 0.099   | 0.516  | 0.668    | 0.205   | 0.433        | 0.606        | 0.356   | 0.058   |        | 0.265  |
| <b>IL-22</b>                  | 0.167  | -0.167  | 0.767*   | 0.733* | 0.733*  | 0.700* | -0.650   | 0.683*  | 0.500        | 0.650        | 0.750*  | 0.667*  | 0.417  | 1.000  |
| <i>Sig.</i>                   | 0.668  | 0.668   | 0.016    | 0.025  | 0.025   | 0.036  | 0.058    | 0.042   | 0.170        | 0.058        | 0.020   | 0.050   | 0.265  |        |
| <b>CD19+<br/>CD138+</b>       | -0.050 | 0.333   | -0.383   | -0.050 | -0.333  | 0.367  | 0.550    | -0.167  | 0.017        | 0.333        | 0.267   | -0.167  | -0.233 | -0.083 |
| <i>Sig.</i>                   | 0.898  | 0.381   | 0.308    | 0.898  | 0.381   | 0.332  | 0.125    | 0.668   | 0.966        | 0.381        | 0.488   | 0.668   | 0.546  | 0.831  |
| <b>anti-S1-IgA<br/>serum</b>  | -0.167 | 0.267   | 0.250    | -0.467 | -0.067  | -0.183 | -0.083   | -0.500  | -0.100       | 0.100        | 0.183   | 0.000   | -0.117 | -0.167 |
| <i>Sig.</i>                   | 0.668  | 0.488   | 0.516    | 0.205  | 0.865   | 0.637  | 0.831    | 0.170   | 0.798        | 0.798        | 0.637   | 1.000   | 0.765  | 0.668  |
| <b>anti-RBD-IgA<br/>serum</b> | 0.567  | -0.317  | 0.183    | -0.300 | -0.517  | -0.233 | -0.217   | -0.783* | -0.600       | -0.500       | -0.450  | -0.483  | -0.333 | -0.400 |
| <i>Sig.</i>                   | 0.112  | 0.406   | 0.637    | 0.433  | 0.154   | 0.546  | 0.576    | 0.013   | 0.088        | 0.170        | 0.224   | 0.187   | 0.381  | 0.286  |
| <b>anti-S1-IgA</b>            | -0.250 | 0.817** | 0.150    | 0.167  | 0.083   | 0.650  | 0.083    | 0.300   | 0.133        | 0.717*       | 0.683*  | 0.217   | 0.083  | 0.383  |

|                           |        |        |        |         |        |        |       |        |        |        |       |        |         |        |
|---------------------------|--------|--------|--------|---------|--------|--------|-------|--------|--------|--------|-------|--------|---------|--------|
| <b>nasal</b>              |        |        |        |         |        |        |       |        |        |        |       |        |         |        |
| <i>Sig.</i>               | 0.516  | 0.007  | 0.700  | 0.668   | 0.831  | 0.058  | 0.831 | 0.433  | 0.732  | 0.030  | 0.042 | 0.576  | 0.831   | 0.308  |
| <b>anti-RBD-IgA nasal</b> | -0.033 | 0.717* | 0.067  | 0.283   | -0.133 | 0.633  | 0.067 | 0.233  | -0.283 | 0.333  | 0.300 | 0.000  | 0.117   | 0.183  |
| <i>Sig.</i>               | 0.932  | 0.030  | 0.865  | 0.460   | 0.732  | 0.067  | 0.865 | 0.546  | 0.460  | 0.381  | 0.433 | 1.000  | 0.765   | 0.637  |
| <b>anti-spike-IgG</b>     | -0.017 | 0.650  | -0.117 | -0.350  | 0.000  | 0.300  | 0.050 | 0.117  | -0.050 | 0.450  | 0.383 | 0.033  | -0.417  | 0.067  |
| <i>Sig.</i>               | 0.966  | 0.058  | 0.765  | 0.356   | 1.000  | 0.433  | 0.898 | 0.765  | 0.898  | 0.224  | 0.308 | 0.932  | 0.265   | 0.865  |
| <b>RAI</b>                | -0.550 | -0.100 | 0.233  | 0.500   | 0.200  | -0.083 | 0.133 | 0.117  | 0.233  | -0.083 | 0.033 | 0.233  | 0.817** | 0.150  |
| <i>Sig.</i>               | 0.125  | 0.798  | 0.546  | 0.170   | 0.606  | 0.831  | 0.732 | 0.765  | 0.546  | 0.831  | 0.932 | 0.546  | 0.007   | 0.700  |
| <b>IC50 wt</b>            | -0.433 | 0.767* | -0.183 | -0.283  | 0.017  | 0.300  | 0.467 | 0.033  | -0.150 | 0.350  | 0.433 | 0.050  | -0.067  | 0.050  |
| <i>Sig.</i>               | 0.244  | 0.016  | 0.637  | 0.460   | 0.966  | 0.433  | 0.205 | 0.932  | 0.700  | 0.356  | 0.244 | 0.898  | 0.865   | 0.898  |
| <b>IC50 BA.5</b>          | -0.183 | 0.617  | -0.217 | -0.717* | -0.267 | -0.133 | 0.283 | -0.383 | -0.283 | 0.083  | 0.083 | -0.233 | -0.450  | -0.333 |
| <i>Sig.</i>               | 0.637  | 0.077  | 0.576  | 0.030   | 0.488  | 0.732  | 0.460 | 0.308  | 0.460  | 0.831  | 0.831 | 0.546  | 0.224   | 0.381  |

**Supplementary Table 11 (continued). Correlation coefficient and significance (Sig.) of immunity parameters in patients on conv.**

|                               | <b>CD19+<br/>CD138+</b> | <b>anti-S1-IgA<br/>serum</b> | <b>anti-RBD-IgA<br/>serum</b> | <b>anti-S1-IgA<br/>nasal</b> | <b>anti-RBD-IgA<br/>nasal</b> | <b>anti-spike-IgG</b> | <b>RAI</b> | <b>IC50 wt</b> | <b>IC50 BA.5</b> |
|-------------------------------|-------------------------|------------------------------|-------------------------------|------------------------------|-------------------------------|-----------------------|------------|----------------|------------------|
| <b>Age</b>                    | -0.050                  | -0.167                       | 0.567                         | -0.250                       | -0.033                        | -0.017                | -0.550     | -0.433         | -0.183           |
| <i>Sig.</i>                   | 0.898                   | 0.668                        | 0.112                         | 0.516                        | 0.932                         | 0.966                 | 0.125      | 0.244          | 0.637            |
| <b>BMI</b>                    | 0.333                   | 0.267                        | -0.317                        | 0.817**                      | 0.717*                        | 0.650                 | -0.100     | 0.767*         | 0.617            |
| <i>Sig.</i>                   | 0.381                   | 0.488                        | 0.406                         | 0.007                        | 0.030                         | 0.058                 | 0.798      | 0.016          | 0.077            |
| <b>IL-5</b>                   | -0.383                  | 0.250                        | 0.183                         | 0.150                        | 0.067                         | -0.117                | 0.233      | -0.183         | -0.217           |
| <i>Sig.</i>                   | 0.308                   | 0.516                        | 0.637                         | 0.700                        | 0.865                         | 0.765                 | 0.546      | 0.637          | 0.576            |
| <b>IL-13</b>                  | -0.050                  | -0.467                       | -0.300                        | 0.167                        | 0.283                         | -0.350                | 0.500      | -0.283         | -0.717*          |
| <i>Sig.</i>                   | 0.898                   | 0.205                        | 0.433                         | 0.668                        | 0.460                         | 0.356                 | 0.170      | 0.460          | 0.030            |
| <b>IL-2</b>                   | -0.333                  | -0.067                       | -0.517                        | 0.083                        | -0.133                        | 0.000                 | 0.200      | 0.017          | -0.267           |
| <i>Sig.</i>                   | 0.381                   | 0.865                        | 0.154                         | 0.831                        | 0.732                         | 1.000                 | 0.606      | 0.966          | 0.488            |
| <b>IL-6</b>                   | 0.367                   | -0.183                       | -0.233                        | 0.650                        | 0.633                         | 0.300                 | -0.083     | 0.300          | -0.133           |
| <i>Sig.</i>                   | 0.332                   | 0.637                        | 0.546                         | 0.058                        | 0.067                         | 0.433                 | 0.831      | 0.433          | 0.732            |
| <b>IL-9</b>                   | 0.550                   | -0.083                       | -0.217                        | 0.083                        | 0.067                         | 0.050                 | 0.133      | 0.467          | 0.283            |
| <i>Sig.</i>                   | 0.125                   | 0.831                        | 0.576                         | 0.831                        | 0.865                         | 0.898                 | 0.732      | 0.205          | 0.460            |
| <b>IL-10</b>                  | -0.167                  | -0.500                       | -0.783*                       | 0.300                        | 0.233                         | 0.117                 | 0.117      | 0.033          | -0.383           |
| <i>Sig.</i>                   | 0.668                   | 0.170                        | 0.013                         | 0.433                        | 0.546                         | 0.765                 | 0.765      | 0.932          | 0.308            |
| <b>IFN<math>\gamma</math></b> | 0.017                   | -0.100                       | -0.600                        | 0.133                        | -0.283                        | -0.050                | 0.233      | -0.150         | -0.283           |
| <i>Sig.</i>                   | 0.966                   | 0.798                        | 0.088                         | 0.732                        | 0.460                         | 0.898                 | 0.546      | 0.700          | 0.460            |
| <b>TNF<math>\alpha</math></b> | 0.333                   | 0.100                        | -0.500                        | 0.717*                       | 0.333                         | 0.450                 | -0.083     | 0.350          | 0.083            |
| <i>Sig.</i>                   | 0.381                   | 0.798                        | 0.170                         | 0.030                        | 0.381                         | 0.224                 | 0.831      | 0.356          | 0.831            |
| <b>IL-17A</b>                 | 0.267                   | 0.183                        | -0.450                        | 0.683*                       | 0.300                         | 0.383                 | 0.033      | 0.433          | 0.083            |
| <i>Sig.</i>                   | 0.488                   | 0.637                        | 0.224                         | 0.042                        | 0.433                         | 0.308                 | 0.932      | 0.244          | 0.831            |
| <b>IL-17F</b>                 | -0.167                  | 0.000                        | -0.483                        | 0.217                        | 0.000                         | 0.033                 | 0.233      | 0.050          | -0.233           |
| <i>Sig.</i>                   | 0.668                   | 1.000                        | 0.187                         | 0.576                        | 1.000                         | 0.932                 | 0.546      | 0.898          | 0.546            |
| <b>IL-4</b>                   | -0.233                  | -0.117                       | -0.333                        | 0.083                        | 0.117                         | -0.417                | 0.817**    | -0.067         | -0.450           |
| <i>Sig.</i>                   | 0.546                   | 0.765                        | 0.381                         | 0.831                        | 0.765                         | 0.265                 | 0.007      | 0.865          | 0.224            |

|                                     |        |        |        |        |        |         |         |        |         |
|-------------------------------------|--------|--------|--------|--------|--------|---------|---------|--------|---------|
| <b>IL-22</b>                        | -0.083 | -0.167 | -0.400 | 0.383  | 0.183  | 0.067   | 0.150   | 0.050  | -0.333  |
| <i>Sig.</i>                         | 0.831  | 0.668  | 0.286  | 0.308  | 0.637  | 0.865   | 0.700   | 0.898  | 0.381   |
| <b>CD19+</b><br><b>CD138+</b>       | 1.000  | -0.250 | -0.183 | 0.250  | 0.100  | 0.050   | -0.033  | 0.367  | -0.017  |
| <i>Sig.</i>                         |        | 0.516  | 0.637  | 0.516  | 0.798  | 0.898   | 0.932   | 0.332  | 0.966   |
| <b>anti-S1-IgA</b><br><b>serum</b>  | -0.250 | 1.000  | 0.367  | 0.183  | -0.117 | 0.400   | -0.183  | 0.350  | 0.767*  |
| <i>Sig.</i>                         | 0.516  |        | 0.332  | 0.637  | 0.765  | 0.286   | 0.637   | 0.356  | 0.016   |
| <b>anti-RBD-IgA</b><br><b>serum</b> | -0.183 | 0.367  | 1.000  | -0.467 | -0.183 | -0.250  | -0.200  | -0.417 | 0.083   |
| <i>Sig.</i>                         | 0.637  | 0.332  |        | 0.205  | 0.637  | 0.516   | 0.606   | 0.265  | 0.831   |
| <b>anti-S1-IgA</b><br><b>nasal</b>  | 0.250  | 0.183  | -0.467 | 1.000  | 0.783* | 0.733*  | -0.167  | 0.667* | 0.433   |
| <i>Sig.</i>                         | 0.516  | 0.637  | 0.205  |        | 0.013  | 0.025   | 0.668   | 0.050  | 0.244   |
| <b>anti-RBD-IgA</b><br><b>nasal</b> | 0.100  | -0.117 | -0.183 | 0.783* | 1.000  | 0.517   | -0.167  | 0.367  | 0.183   |
| <i>Sig.</i>                         | 0.798  | 0.765  | 0.637  | 0.013  |        | 0.154   | 0.668   | 0.332  | 0.637   |
| <b>anti-spike-IgG</b>               | 0.050  | 0.400  | -0.250 | 0.733* | 0.517  | 1.000   | -0.717* | 0.700* | 0.800** |
| <i>Sig.</i>                         | 0.898  | 0.286  | 0.516  | 0.025  | 0.154  |         | 0.030   | 0.036  | 0.010   |
| <b>RAI</b>                          | -0.033 | -0.183 | -0.200 | -0.167 | -0.167 | -0.717* | 1.000   | -0.217 | -0.550  |
| <i>Sig.</i>                         | 0.932  | 0.637  | 0.606  | 0.668  | 0.668  | 0.030   |         | 0.576  | 0.125   |
| <b>IC50 wt</b>                      | 0.367  | 0.350  | -0.417 | 0.667* | 0.367  | 0.700*  | -0.217  | 1.000  | 0.700*  |
| <i>Sig.</i>                         | 0.332  | 0.356  | 0.265  | 0.050  | 0.332  | 0.036   | 0.576   |        | 0.036   |
| <b>IC50 BA.5</b>                    | -0.017 | 0.767* | 0.083  | 0.433  | 0.183  | 0.800** | -0.550  | 0.700* | 1.000   |
| <i>Sig.</i>                         | 0.966  | 0.016  | 0.831  | 0.244  | 0.637  | 0.010   | 0.125   | 0.036  |         |

Notes to supplementary table 11: Significance is given by \* p<0.05 and \*\*p<0.01 (Spearman rank correlation).

**Supplementary Table 12. Correlation coefficient and significance (Sig.) of cellular parameters in patients on mAb**

|                                             | Age    | BMI    | CD69+CD4+ | IFN $\gamma$ +CD4+ | Ki67+CD4+ | Memory-CD4+ | Memory-IFN $\gamma$ +CD4+ | Memory-Ki67+CD4+ | Effector-CD4+ | Effector-IFN $\gamma$ +CD4+ | Effector-Ki67+CD4+ | Temra-CD4+ |
|---------------------------------------------|--------|--------|-----------|--------------------|-----------|-------------|---------------------------|------------------|---------------|-----------------------------|--------------------|------------|
| <b>Age</b>                                  | 1.000  | -0.283 | -0.509    | -0.400             | 0.000     | 0.017       | -0.356                    | 0.000            | 0.283         | -0.305                      | -0.268             | -0.217     |
| <i>Sig.</i>                                 |        | 0.460  | 0.162     | 0.286              | 1.000     | 0.966       | 0.347                     | 1.000            | 0.460         | 0.425                       | 0.486              | 0.576      |
| <b>BMI</b>                                  | -0.283 | 1.000  | -0.119    | -0.317             | -0.133    | -0.200      | -0.441                    | 0.167            | -0.267        | 0.017                       | 0.259              | 0.133      |
| <i>Sig.</i>                                 | 0.460  |        | 0.761     | 0.406              | 0.732     | 0.606       | 0.235                     | 0.668            | 0.488         | 0.965                       | 0.500              | 0.732      |
| <b>CD4+CD69+</b>                            | -0.509 | -0.119 | 1.000     | 0.661              | 0.254     | 0.085       | 0.603                     | 0.153            | -0.322        | 0.707*                      | 0.426              | -0.356     |
| <i>Sig.</i>                                 | 0.162  | 0.761  |           | 0.053              | 0.509     | 0.828       | 0.085                     | 0.695            | 0.398         | 0.033                       | 0.253              | 0.347      |
| <b>IFN<math>\gamma</math>+CD4+</b>          | -0.400 | -0.317 | 0.661     | 1.000              | 0.117     | 0.350       | 0.814**                   | 0.100            | -0.517        | 0.763*                      | 0.494              | 0.083      |
| <i>Sig.</i>                                 | 0.286  | 0.406  | 0.053     |                    | 0.765     | 0.356       | 0.008                     | 0.798            | 0.154         | 0.017                       | 0.177              | 0.831      |
| <b>Ki67+CD4+</b>                            | 0.000  | -0.133 | 0.254     | 0.117              | 1.000     | -0.017      | -0.153                    | 0.917**          | -0.067        | 0.424                       | 0.502              | 0.117      |
| <i>Sig.</i>                                 | 1.000  | 0.732  | 0.509     | 0.765              |           | 0.966       | 0.695                     | 0.001            | 0.865         | 0.256                       | 0.168              | 0.765      |
| <b>Memory-CD4+</b>                          | 0.017  | -0.200 | 0.085     | 0.350              | -0.017    | 1.000       | 0.458                     | -0.083           | -0.533        | 0.170                       | -0.126             | -0.317     |
| <i>Sig.</i>                                 | 0.966  | 0.606  | 0.828     | 0.356              | 0.966     |             | 0.215                     | 0.831            | 0.139         | 0.663                       | 0.748              | 0.406      |
| <b>Memory-IFN<math>\gamma</math>+CD4+</b>   | -0.356 | -0.441 | 0.603     | 0.814**            | -0.153    | 0.458       | 1.000                     | -0.322           | -0.271        | 0.362                       | 0.000              | -0.186     |
| <i>Sig.</i>                                 | 0.347  | 0.235  | 0.085     | 0.008              | 0.695     | 0.215       |                           | 0.398            | 0.480         | 0.338                       | 1.000              | 0.631      |
| <b>Memory-Ki67+CD4+</b>                     | 0.000  | 0.167  | 0.153     | 0.100              | 0.917**   | -0.083      | -0.322                    | 1.000            | -0.200        | 0.509                       | 0.669*             | 0.283      |
| <i>Sig.</i>                                 | 1.000  | 0.668  | 0.695     | 0.798              | 0.001     | 0.831       | 0.398                     |                  | 0.606         | 0.162                       | 0.049              | 0.460      |
| <b>Effector-CD4+</b>                        | 0.283  | -0.267 | -0.322    | -0.517             | -0.067    | -0.533      | -0.271                    | -0.200           | 1.000         | -0.729*                     | -0.661             | 0.267      |
| <i>Sig.</i>                                 | 0.460  | 0.488  | 0.398     | 0.154              | 0.865     | 0.139       | 0.480                     | 0.606            |               | 0.026                       | 0.053              | 0.488      |
| <b>Effector-IFN<math>\gamma</math>+CD4+</b> | -0.305 | 0.017  | 0.707*    | 0.763*             | 0.424     | 0.170       | 0.362                     | 0.509            | -0.729*       | 1.000                       | 0.885**            | -0.102     |
| <i>Sig.</i>                                 | 0.425  | 0.965  | 0.033     | 0.017              | 0.256     | 0.663       | 0.338                     | 0.162            | 0.026         |                             | 0.002              | 0.795      |
| <b>Effector-Ki67+CD4+</b>                   | -0.268 | 0.259  | 0.426     | 0.494              | 0.502     | -0.126      | 0.000                     | 0.669*           | -0.661        | 0.885**                     | 1.000              | 0.109      |
| <i>Sig.</i>                                 | 0.486  | 0.500  | 0.253     | 0.177              | 0.168     | 0.748       | 1.000                     | 0.049            | 0.053         | 0.002                       |                    | 0.781      |
| <b>Temra-CD4+</b>                           | -0.217 | 0.133  | -0.356    | 0.083              | 0.117     | -0.317      | -0.186                    | 0.283            | 0.267         | -0.102                      | 0.109              | 1.000      |
| <i>Sig.</i>                                 | 0.576  | 0.732  | 0.347     | 0.831              | 0.765     | 0.406       | 0.631                     | 0.460            | 0.488         | 0.795                       | 0.781              |            |
| <b>Temra-IFN<math>\gamma</math>+CD4+</b>    | -0.256 | -0.529 | 0.427     | 0.694*             | 0.548     | 0.219       | 0.353                     | 0.456            | -0.383        | 0.687*                      | 0.568              | 0.164      |
| <i>Sig.</i>                                 | 0.507  | 0.143  | 0.252     | 0.038              | 0.127     | 0.571       | 0.352                     | 0.217            | 0.308         | 0.041                       | 0.110              | 0.673      |
| <b>Temra-Ki67+CD4+</b>                      | -0.279 | -0.305 | 0.390     | 0.574              | 0.801**   | 0.218       | 0.204                     | 0.749*           | -0.322        | 0.655                       | 0.603              | 0.305      |
| <i>Sig.</i>                                 | 0.468  | 0.425  | 0.300     | 0.106              | 0.010     | 0.574       | 0.599                     | 0.020            | 0.398         | 0.055                       | 0.086              | 0.425      |
| <b>CD69+CD8+</b>                            | -0.527 | 0.092  | 0.953**   | 0.469              | 0.100     | 0.017       | 0.460                     | 0.042            | -0.310        | 0.596                       | 0.349              | -0.460     |
| <i>Sig.</i>                                 | 0.145  | 0.814  | 0.000     | 0.203              | 0.797     | 0.966       | 0.213                     | 0.915            | 0.417         | 0.090                       | 0.358              | 0.213      |
| <b>IFN<math>\gamma</math>+CD8+</b>          | 0.000  | -0.433 | -0.051    | 0.250              | -0.667*   | -0.217      | 0.356                     | -0.717*          | 0.133         | -0.119                      | -0.201             | 0.033      |
| <i>Sig.</i>                                 | 1.000  | 0.244  | 0.897     | 0.516              | 0.050     | 0.576       | 0.347                     | 0.030            | 0.732         | 0.761                       | 0.604              | 0.932      |
| <b>Ki67+CD8+</b>                            | 0.183  | -0.033 | 0.000     | -0.250             | 0.783*    | -0.433      | -0.424                    | 0.700*           | 0.100         | 0.170                       | 0.435              | -0.017     |
| <i>Sig.</i>                                 | 0.637  | 0.932  | 1.000     | 0.516              | 0.013     | 0.244       | 0.256                     | 0.036            | 0.798         | 0.663                       | 0.242              | 0.966      |
| <b>Memory-CD8+</b>                          | -0.133 | -0.217 | 0.288     | 0.217              | -0.100    | 0.483       | 0.475                     | -0.217           | 0.250         | -0.170                      | -0.527             | -0.033     |
| <i>Sig.</i>                                 | 0.732  | 0.576  | 0.452     | 0.576              | 0.798     | 0.187       | 0.197                     | 0.576            | 0.516         | 0.663                       | 0.145              | 0.932      |
| <b>Memory-IFN<math>\gamma</math>+CD8+</b>   | 0.252  | -0.661 | -0.248    | 0.070              | -0.392    | -0.279      | 0.106                     | -0.487           | 0.418         | -0.266                      | -0.306             | 0.200      |
| <i>Sig.</i>                                 | 0.512  | 0.052  | 0.520     | 0.859              | 0.297     | 0.468       | 0.786                     | 0.183            | 0.263         | 0.490                       | 0.423              | 0.606      |
| <b>Memory-Ki67+CD8+</b>                     | -0.017 | 0.350  | 0.000     | 0.300              | 0.417     | -0.267      | -0.186                    | 0.667*           | -0.417        | 0.593                       | 0.845**            | 0.450      |
| <i>Sig.</i>                                 | 0.966  | 0.356  | 1.000     | 0.433              | 0.265     | 0.488       | 0.631                     | 0.050            | 0.265         | 0.092                       | 0.004              | 0.224      |
| <b>Effector-CD8+</b>                        | 0.500  | -0.300 | -0.678*   | -0.683*            | -0.383    | -0.333      | -0.407                    | -0.483           | 0.800**       | -0.881**                    | -0.778*            | 0.100      |

|                                             |        |        |        |         |        |        |        |         |        |         |        |         |
|---------------------------------------------|--------|--------|--------|---------|--------|--------|--------|---------|--------|---------|--------|---------|
| <i>Sig.</i>                                 | 0.170  | 0.433  | 0.045  | 0.042   | 0.308  | 0.381  | 0.277  | 0.187   | 0.010  | 0.002   | 0.014  | 0.798   |
| <b>Effector-IFN<math>\gamma</math>+CD8+</b> | 0.270  | -0.557 | -0.142 | 0.174   | -0.653 | -0.035 | 0.283  | -0.696* | 0.279  | -0.230  | -0.411 | 0.026   |
| <i>Sig.</i>                                 | 0.483  | 0.119  | 0.716  | 0.654   | 0.057  | 0.929  | 0.460  | 0.037   | 0.468  | 0.551   | 0.272  | 0.947   |
| <b>Effector-Ki67+CD8+</b>                   | 0.000  | -0.167 | 0.254  | 0.067   | 0.783* | 0.033  | 0.017  | 0.600   | -0.233 | 0.356   | 0.444  | -0.283  |
| <i>Sig.</i>                                 | 1.000  | 0.668  | 0.509  | 0.865   | 0.013  | 0.932  | 0.965  | 0.088   | 0.546  | 0.347   | 0.232  | 0.460   |
| <b>Temra-CD8+</b>                           | 0.150  | 0.000  | 0.509  | 0.267   | 0.233  | -0.250 | 0.288  | 0.183   | -0.133 | 0.441   | 0.410  | -0.417  |
| <i>Sig.</i>                                 | 0.700  | 1.000  | 0.162  | 0.488   | 0.546  | 0.516  | 0.452  | 0.637   | 0.732  | 0.235   | 0.273  | 0.265   |
| <b>Temra-IFN<math>\gamma</math>+CD8+</b>    | 0.186  | -0.356 | 0.207  | -0.068  | -0.254 | -0.051 | -0.017 | -0.373  | -0.119 | 0.103   | -0.017 | -0.678* |
| <i>Sig.</i>                                 | 0.631  | 0.347  | 0.593  | 0.862   | 0.509  | 0.897  | 0.965  | 0.323   | 0.761  | 0.791   | 0.965  | 0.045   |
| <b>Temra-Ki67+CD8+</b>                      | -0.536 | 0.209  | 0.221  | 0.209   | 0.603  | -0.259 | -0.136 | 0.636   | -0.377 | 0.511   | 0.748* | 0.293   |
| <i>Sig.</i>                                 | 0.137  | 0.589  | 0.567  | 0.589   | 0.086  | 0.500  | 0.727  | 0.066   | 0.318  | 0.160   | 0.020  | 0.444   |
| <b>Perforin+CD8+</b>                        | 0.100  | -0.150 | -0.186 | 0.483   | 0.033  | 0.600  | 0.170  | 0.183   | -0.550 | 0.373   | 0.293  | 0.317   |
| <i>Sig.</i>                                 | 0.798  | 0.700  | 0.631  | 0.187   | 0.932  | 0.088  | 0.663  | 0.637   | 0.125  | 0.323   | 0.444  | 0.406   |
| <b>Granzyme B+CD8+</b>                      | -0.067 | 0.100  | -0.186 | -0.683* | 0.183  | -0.433 | -0.576 | 0.100   | 0.700* | -0.559  | -0.427 | 0.150   |
| <i>Sig.</i>                                 | 0.865  | 0.798  | 0.631  | 0.042   | 0.637  | 0.244  | 0.104  | 0.798   | 0.036  | 0.117   | 0.252  | 0.700   |
| <b>IFN<math>\gamma</math>+CD16+</b>         | 0.274  | -0.420 | 0.594  | 0.475   | 0.402  | -0.055 | 0.297  | 0.347   | 0.055  | 0.539   | 0.312  | -0.164  |
| <i>Sig.</i>                                 | 0.476  | 0.260  | 0.092  | 0.197   | 0.284  | 0.889  | 0.438  | 0.360   | 0.889  | 0.135   | 0.414  | 0.673   |
| <b>Perforin+CD16+</b>                       | 0.367  | 0.117  | -0.661 | -0.333  | 0.450  | -0.083 | -0.542 | 0.567   | 0.250  | -0.254  | 0.025  | 0.650   |
| <i>Sig.</i>                                 | 0.332  | 0.765  | 0.053  | 0.381   | 0.224  | 0.831  | 0.131  | 0.112   | 0.516  | 0.509   | 0.949  | 0.058   |
| <b>Granzyme B+CD16+</b>                     | 0.133  | 0.233  | -0.627 | -0.633  | -0.250 | -0.517 | -0.356 | -0.267  | 0.567  | -0.746* | -0.435 | 0.267   |
| <i>Sig.</i>                                 | 0.732  | 0.546  | 0.071  | 0.067   | 0.516  | 0.154  | 0.347  | 0.488   | 0.112  | 0.021   | 0.242  | 0.488   |

**Supplementary Table 12 (continued). Correlation coefficient and significance (Sig.) of cellular parameters in patients on mAb**

|                                           | Temra-IFN $\gamma$ +CD4+ | Temra-Ki67+CD4+ | CD69+CD8+ | IFN $\gamma$ +CD8+ | Ki67+CD8+ | Memory-CD8+ | Memory-IFN $\gamma$ +CD8+ | Memory-Ki67+CD8+ | Effector-CD8+ | Effector-IFN $\gamma$ +CD8+ | Effector-Ki67+CD8+ |
|-------------------------------------------|--------------------------|-----------------|-----------|--------------------|-----------|-------------|---------------------------|------------------|---------------|-----------------------------|--------------------|
| <b>Age</b>                                | -0.256                   | -0.279          | -0.527    | 0.000              | 0.183     | -0.133      | 0.252                     | -0.017           | 0.500         | 0.270                       | 0.000              |
| <i>Sig.</i>                               | 0.507                    | 0.468           | 0.145     | 1.000              | 0.637     | 0.732       | 0.512                     | 0.966            | 0.170         | 0.483                       | 1.000              |
| <b>BMI</b>                                | -0.529                   | -0.305          | 0.092     | -0.433             | -0.033    | -0.217      | -0.661                    | 0.350            | -0.300        | -0.557                      | -0.167             |
| <i>Sig.</i>                               | 0.143                    | 0.425           | 0.814     | 0.244              | 0.932     | 0.576       | 0.052                     | 0.356            | 0.433         | 0.119                       | 0.668              |
| <b>CD4+CD69+</b>                          | 0.427                    | 0.390           | 0.953**   | -0.051             | 0.000     | 0.288       | -0.248                    | 0.000            | -0.678*       | -0.142                      | 0.254              |
| <i>Sig.</i>                               | 0.252                    | 0.300           | 0.000     | 0.897              | 1.000     | 0.452       | 0.520                     | 1.000            | 0.045         | 0.716                       | 0.509              |
| <b>IFN<math>\gamma</math>+CD4+</b>        | 0.694*                   | 0.574           | 0.469     | 0.250              | -0.250    | 0.217       | 0.070                     | 0.300            | -0.683*       | 0.174                       | 0.067              |
| <i>Sig.</i>                               | 0.038                    | 0.106           | 0.203     | 0.516              | 0.516     | 0.576       | 0.859                     | 0.433            | 0.042         | 0.654                       | 0.865              |
| <b>Ki67+CD4+</b>                          | 0.548                    | 0.801**         | 0.100     | -0.667*            | 0.783*    | -0.100      | -0.392                    | 0.417            | -0.383        | -0.653                      | 0.783*             |
| <i>Sig.</i>                               | 0.127                    | 0.010           | 0.797     | 0.050              | 0.013     | 0.798       | 0.297                     | 0.265            | 0.308         | 0.057                       | 0.013              |
| <b>Memory-CD4+</b>                        | 0.219                    | 0.218           | 0.017     | -0.217             | -0.433    | 0.483       | -0.279                    | -0.267           | -0.333        | -0.035                      | 0.033              |
| <i>Sig.</i>                               | 0.571                    | 0.574           | 0.966     | 0.576              | 0.244     | 0.187       | 0.468                     | 0.488            | 0.381         | 0.929                       | 0.932              |
| <b>Memory-IFN<math>\gamma</math>+CD4+</b> | 0.353                    | 0.204           | 0.460     | 0.356              | -0.424    | 0.475       | 0.106                     | -0.186           | -0.407        | 0.283                       | 0.017              |
| <i>Sig.</i>                               | 0.352                    | 0.599           | 0.213     | 0.347              | 0.256     | 0.197       | 0.786                     | 0.631            | 0.277         | 0.460                       | 0.965              |

|                                             |         |         |        |         |         |        |         |         |          |         |         |
|---------------------------------------------|---------|---------|--------|---------|---------|--------|---------|---------|----------|---------|---------|
| <b>Memory-Ki67+CD4+</b>                     | 0.456   | 0.749*  | 0.042  | -0.717* | 0.700*  | -0.217 | -0.487  | 0.667*  | -0.483   | -0.696* | 0.600   |
| <i>Sig.</i>                                 | 0.217   | 0.020   | 0.915  | 0.030   | 0.036   | 0.576  | 0.183   | 0.050   | 0.187    | 0.037   | 0.088   |
| <b>Effector-CD4+</b>                        | -0.383  | -0.322  | -0.310 | 0.133   | 0.100   | 0.250  | 0.418   | -0.417  | 0.800**  | 0.279   | -0.233  |
| <i>Sig.</i>                                 | 0.308   | 0.398   | 0.417  | 0.732   | 0.798   | 0.516  | 0.263   | 0.265   | 0.010    | 0.468   | 0.546   |
| <b>Effector-IFN<math>\gamma</math>+CD4+</b> | 0.687*  | 0.655   | 0.596  | -0.119  | 0.170   | -0.170 | -0.266  | 0.593   | -0.881** | -0.230  | 0.356   |
| <i>Sig.</i>                                 | 0.041   | 0.055   | 0.090  | 0.761   | 0.663   | 0.663  | 0.490   | 0.092   | 0.002    | 0.551   | 0.347   |
| <b>Effector-Ki67+CD4+</b>                   | 0.568   | 0.603   | 0.349  | -0.201  | 0.435   | -0.527 | -0.306  | 0.845** | -0.778*  | -0.411  | 0.444   |
| <i>Sig.</i>                                 | 0.110   | 0.086   | 0.358  | 0.604   | 0.242   | 0.145  | 0.423   | 0.004   | 0.014    | 0.272   | 0.232   |
| <b>Temra-CD4+</b>                           | 0.164   | 0.305   | -0.460 | 0.033   | -0.017  | -0.033 | 0.200   | 0.450   | 0.100    | 0.026   | -0.283  |
| <i>Sig.</i>                                 | 0.673   | 0.425   | 0.213  | 0.932   | 0.966   | 0.932  | 0.606   | 0.224   | 0.798    | 0.947   | 0.460   |
| <b>Temra-IFN<math>\gamma</math>+CD4+</b>    | 1.000   | 0.896** | 0.193  | 0.073   | 0.237   | -0.091 | 0.200   | 0.329   | -0.456   | 0.029   | 0.402   |
| <i>Sig.</i>                                 |         | 0.001   | 0.620  | 0.852   | 0.539   | 0.815  | 0.605   | 0.388   | 0.217    | 0.942   | 0.284   |
| <b>Temra-Ki67+CD4+</b>                      | 0.896** | 1.000   | 0.162  | -0.331  | 0.392   | 0.017  | -0.141  | 0.444   | -0.557   | -0.332  | 0.522   |
| <i>Sig.</i>                                 | 0.001   |         | 0.678  | 0.385   | 0.297   | 0.965  | 0.718   | 0.231   | 0.119    | 0.383   | 0.149   |
| <b>CD69+CD8+</b>                            | 0.193   | 0.162   | 1.000  | -0.084  | -0.067  | 0.259  | -0.341  | -0.092  | -0.619   | -0.184  | 0.142   |
| <i>Sig.</i>                                 | 0.620   | 0.678   |        | 0.831   | 0.864   | 0.500  | 0.369   | 0.814   | 0.075    | 0.636   | 0.715   |
| <b>IFN<math>\gamma</math>+CD8+</b>          | 0.073   | -0.331  | -0.084 | 1.000   | -0.417  | -0.167 | 0.862** | -0.183  | 0.367    | 0.879** | -0.450  |
| <i>Sig.</i>                                 | 0.852   | 0.385   | 0.831  |         | 0.265   | 0.668  | 0.003   | 0.637   | 0.332    | 0.002   | 0.224   |
| <b>Ki67+CD8+</b>                            | 0.237   | 0.392   | -0.067 | -0.417  | 1.000   | -0.567 | -0.200  | 0.433   | -0.067   | -0.566  | 0.833** |
| <i>Sig.</i>                                 | 0.539   | 0.297   | 0.864  | 0.265   |         | 0.112  | 0.606   | 0.244   | 0.865    | 0.112   | 0.005   |
| <b>Memory-CD8+</b>                          | -0.091  | 0.017   | 0.259  | -0.167  | -0.567  | 1.000  | -0.131  | -0.583  | 0.000    | 0.131   | -0.350  |
| <i>Sig.</i>                                 | 0.815   | 0.965   | 0.500  | 0.668   | 0.112   |        | 0.738   | 0.099   | 1.000    | 0.738   | 0.356   |
| <b>Memory-IFN<math>\gamma</math>+CD8+</b>   | 0.200   | -0.141  | -0.341 | 0.862** | -0.200  | -0.131 | 1.000   | -0.209  | 0.618    | 0.891** | -0.374  |
| <i>Sig.</i>                                 | 0.605   | 0.718   | 0.369  | 0.003   | 0.606   | 0.738  |         | 0.590   | 0.076    | 0.001   | 0.321   |
| <b>Memory-Ki67+CD8+</b>                     | 0.329   | 0.444   | -0.092 | -0.183  | 0.433   | -0.583 | -0.209  | 1.000   | -0.517   | -0.348  | 0.283   |
| <i>Sig.</i>                                 | 0.388   | 0.231   | 0.814  | 0.637   | 0.244   | 0.099  | 0.590   |         | 0.154    | 0.359   | 0.460   |
| <b>Effector-CD8+</b>                        | -0.456  | -0.557  | -0.619 | 0.367   | -0.067  | 0.000  | 0.618   | -0.517  | 1.000    | 0.514   | -0.367  |
| <i>Sig.</i>                                 | 0.217   | 0.119   | 0.075  | 0.332   | 0.865   | 1.000  | 0.076   | 0.154   |          | 0.157   | 0.332   |
| <b>Effector-IFN<math>\gamma</math>+CD8+</b> | 0.029   | -0.332  | -0.184 | 0.879** | -0.566  | 0.131  | 0.891** | -0.348  | 0.514    | 1.000   | -0.635  |
| <i>Sig.</i>                                 | 0.942   | 0.383   | 0.636  | 0.002   | 0.112   | 0.738  | 0.001   | 0.359   | 0.157    |         | 0.066   |
| <b>Effector-Ki67+CD8+</b>                   | 0.402   | 0.522   | 0.142  | -0.450  | 0.833** | -0.350 | -0.374  | 0.283   | -0.367   | -0.635  | 1.000   |
| <i>Sig.</i>                                 | 0.284   | 0.149   | 0.715  | 0.224   | 0.005   | 0.356  | 0.321   | 0.460   | 0.332    | 0.066   |         |
| <b>Temra-CD8+</b>                           | -0.018  | -0.009  | 0.477  | -0.033  | 0.417   | -0.217 | -0.218  | 0.333   | -0.383   | -0.200  | 0.483   |
| <i>Sig.</i>                                 | 0.963   | 0.982   | 0.194  | 0.932   | 0.265   | 0.576  | 0.574   | 0.381   | 0.308    | 0.606   | 0.187   |
| <b>Temra-IFN<math>\gamma</math>+CD8+</b>    | 0.130   | -0.221  | 0.281  | 0.458   | 0.000   | -0.288 | 0.416   | -0.356  | 0.186    | 0.434   | 0.017   |
| <i>Sig.</i>                                 | 0.739   | 0.567   | 0.464  | 0.215   | 1.000   | 0.452  | 0.265   | 0.347   | 0.631    | 0.243   | 0.965   |
| <b>Temra-Ki67+CD8+</b>                      | 0.550   | 0.638   | 0.147  | -0.251  | 0.619   | -0.561 | -0.262  | 0.611   | -0.510   | -0.577  | 0.611   |
| <i>Sig.</i>                                 | 0.125   | 0.064   | 0.706  | 0.515   | 0.075   | 0.116  | 0.495   | 0.081   | 0.160    | 0.104   | 0.081   |
| <b>Perforin+CD8+</b>                        | 0.511   | 0.453   | -0.335 | 0.050   | -0.317  | 0.017  | 0.104   | 0.367   | -0.300   | 0.191   | -0.167  |
| <i>Sig.</i>                                 | 0.160   | 0.221   | 0.379  | 0.898   | 0.406   | 0.966  | 0.789   | 0.332   | 0.433    | 0.622   | 0.668   |
| <b>Granzyme B+CD8+</b>                      | -0.292  | -0.122  | -0.075 | -0.317  | 0.250   | 0.167  | -0.035  | -0.417  | 0.517    | -0.209  | -0.050  |
| <i>Sig.</i>                                 | 0.446   | 0.755   | 0.847  | 0.406   | 0.516   | 0.668  | 0.929   | 0.265   | 0.154    | 0.590   | 0.898   |

|                                     |        |        |         |        |       |        |        |        |        |        |        |
|-------------------------------------|--------|--------|---------|--------|-------|--------|--------|--------|--------|--------|--------|
| <b>IFN<math>\gamma</math>+CD16+</b> | 0.400  | 0.391  | 0.458   | -0.037 | 0.183 | 0.237  | 0.086  | 0.183  | -0.274 | 0.143  | 0.164  |
| <i>Sig.</i>                         | 0.286  | 0.298  | 0.215   | 0.926  | 0.638 | 0.539  | 0.826  | 0.638  | 0.476  | 0.714  | 0.673  |
| <b>Perforin+CD16+</b>               | 0.000  | 0.279  | -0.753* | -0.450 | 0.383 | -0.150 | -0.104 | 0.433  | 0.217  | -0.313 | 0.133  |
| <i>Sig.</i>                         | 1.000  | 0.468  | 0.019   | 0.224  | 0.308 | 0.700  | 0.789  | 0.244  | 0.576  | 0.412  | 0.732  |
| <b>Granzyme B+CD16+</b>             | -0.639 | -0.557 | -0.544  | 0.117  | 0.200 | -0.283 | 0.122  | -0.067 | 0.600  | -0.052 | -0.033 |
| <i>Sig.</i>                         | 0.064  | 0.119  | 0.130   | 0.765  | 0.606 | 0.460  | 0.755  | 0.865  | 0.088  | 0.894  | 0.932  |

**Supplementary Table 12 (continued). Correlation coefficient and significance (Sig.) of cellular parameters in patients on mAb**

|                                             | Temra-CD8+ | Temra-IFN $\gamma$ +CD8+ | Temra-Ki67+CD8+ | Perforin+CD8+ | Granzyme B+CD8+ | IFN $\gamma$ +CD16+ | Perforin+CD16+ | Granzyme B+CD16+ |
|---------------------------------------------|------------|--------------------------|-----------------|---------------|-----------------|---------------------|----------------|------------------|
| <b>Age</b>                                  | 0.150      | 0.186                    | -0.536          | 0.100         | -0.067          | 0.274               | 0.367          | 0.133            |
| <i>Sig.</i>                                 | 0.700      | 0.631                    | 0.137           | 0.798         | 0.865           | 0.476               | 0.332          | 0.732            |
| <b>BMI</b>                                  | 0.000      | -0.356                   | 0.209           | -0.150        | 0.100           | -0.420              | 0.117          | 0.233            |
| <i>Sig.</i>                                 | 1.000      | 0.347                    | 0.589           | 0.700         | 0.798           | 0.260               | 0.765          | 0.546            |
| <b>CD4+CD69+</b>                            | 0.509      | 0.207                    | 0.221           | -0.186        | -0.186          | 0.594               | -0.661         | -0.627           |
| <i>Sig.</i>                                 | 0.162      | 0.593                    | 0.567           | 0.631         | 0.631           | 0.092               | 0.053          | 0.071            |
| <b>IFN<math>\gamma</math>+CD4+</b>          | 0.267      | -0.068                   | 0.209           | 0.483         | -0.683*         | 0.475               | -0.333         | -0.633           |
| <i>Sig.</i>                                 | 0.488      | 0.862                    | 0.589           | 0.187         | 0.042           | 0.197               | 0.381          | 0.067            |
| <b>Ki67+CD4+</b>                            | 0.233      | -0.254                   | 0.603           | 0.033         | 0.183           | 0.402               | 0.450          | -0.250           |
| <i>Sig.</i>                                 | 0.546      | 0.509                    | 0.086           | 0.932         | 0.637           | 0.284               | 0.224          | 0.516            |
| <b>Memory-CD4+</b>                          | -0.250     | -0.051                   | -0.259          | 0.600         | -0.433          | -0.055              | -0.083         | -0.517           |
| <i>Sig.</i>                                 | 0.516      | 0.897                    | 0.500           | 0.088         | 0.244           | 0.889               | 0.831          | 0.154            |
| <b>Memory-IFN<math>\gamma</math>+CD4+</b>   | 0.288      | -0.017                   | -0.136          | 0.170         | -0.576          | 0.297               | -0.542         | -0.356           |
| <i>Sig.</i>                                 | 0.452      | 0.965                    | 0.727           | 0.663         | 0.104           | 0.438               | 0.131          | 0.347            |
| <b>Memory-Ki67+CD4+</b>                     | 0.183      | -0.373                   | 0.636           | 0.183         | 0.100           | 0.347               | 0.567          | -0.267           |
| <i>Sig.</i>                                 | 0.637      | 0.323                    | 0.066           | 0.637         | 0.798           | 0.360               | 0.112          | 0.488            |
| <b>Effector-CD4+</b>                        | -0.133     | -0.119                   | -0.377          | -0.550        | 0.700*          | 0.055               | 0.250          | 0.567            |
| <i>Sig.</i>                                 | 0.732      | 0.761                    | 0.318           | 0.125         | 0.036           | 0.889               | 0.516          | 0.112            |
| <b>Effector-IFN<math>\gamma</math>+CD4+</b> | 0.441      | 0.103                    | 0.511           | 0.373         | -0.559          | 0.539               | -0.254         | -0.746*          |
| <i>Sig.</i>                                 | 0.235      | 0.791                    | 0.160           | 0.323         | 0.117           | 0.135               | 0.509          | 0.021            |
| <b>Effector-Ki67+CD4+</b>                   | 0.410      | -0.017                   | 0.748*          | 0.293         | -0.427          | 0.312               | 0.025          | -0.435           |
| <i>Sig.</i>                                 | 0.273      | 0.965                    | 0.020           | 0.444         | 0.252           | 0.414               | 0.949          | 0.242            |
| <b>Temra-CD4+</b>                           | -0.417     | -0.678*                  | 0.293           | 0.317         | 0.150           | -0.164              | 0.650          | 0.267            |
| <i>Sig.</i>                                 | 0.265      | 0.045                    | 0.444           | 0.406         | 0.700           | 0.673               | 0.058          | 0.488            |
| <b>Temra-IFN<math>\gamma</math>+CD4+</b>    | -0.018     | 0.130                    | 0.550           | 0.511         | -0.292          | 0.400               | 0.000          | -0.639           |
| <i>Sig.</i>                                 | 0.963      | 0.739                    | 0.125           | 0.160         | 0.446           | 0.286               | 1.000          | 0.064            |
| <b>Temra-Ki67+CD4+</b>                      | -0.009     | -0.221                   | 0.638           | 0.453         | -0.122          | 0.391               | 0.279          | -0.557           |
| <i>Sig.</i>                                 | 0.982      | 0.567                    | 0.064           | 0.221         | 0.755           | 0.298               | 0.468          | 0.119            |

|                                             |        |        |        |        |        |        |         |        |
|---------------------------------------------|--------|--------|--------|--------|--------|--------|---------|--------|
| <b>CD69+CD8+</b>                            | 0.477  | 0.281  | 0.147  | -0.335 | -0.075 | 0.458  | -0.753* | -0.544 |
| <i>Sig.</i>                                 | 0.194  | 0.464  | 0.706  | 0.379  | 0.847  | 0.215  | 0.019   | 0.130  |
| <b>IFN<math>\gamma</math>+CD8+</b>          | -0.033 | 0.458  | -0.251 | 0.050  | -0.317 | -0.037 | -0.450  | 0.117  |
| <i>Sig.</i>                                 | 0.932  | 0.215  | 0.515  | 0.898  | 0.406  | 0.926  | 0.224   | 0.765  |
| <b>Ki67+CD8+</b>                            | 0.417  | 0.000  | 0.619  | -0.317 | 0.250  | 0.183  | 0.383   | 0.200  |
| <i>Sig.</i>                                 | 0.265  | 1.000  | 0.075  | 0.406  | 0.516  | 0.638  | 0.308   | 0.606  |
| <b>Memory-CD8+</b>                          | -0.217 | -0.288 | -0.561 | 0.017  | 0.167  | 0.237  | -0.150  | -0.283 |
| <i>Sig.</i>                                 | 0.576  | 0.452  | 0.116  | 0.966  | 0.668  | 0.539  | 0.700   | 0.460  |
| <b>Memory-IFN<math>\gamma</math>+CD8+</b>   | -0.218 | 0.416  | -0.262 | 0.104  | -0.035 | 0.086  | -0.104  | 0.122  |
| <i>Sig.</i>                                 | 0.574  | 0.265  | 0.495  | 0.789  | 0.929  | 0.826  | 0.789   | 0.755  |
| <b>Memory-Ki67+CD8+</b>                     | 0.333  | -0.356 | 0.611  | 0.367  | -0.417 | 0.183  | 0.433   | -0.067 |
| <i>Sig.</i>                                 | 0.381  | 0.347  | 0.081  | 0.332  | 0.265  | 0.638  | 0.244   | 0.865  |
| <b>Effector-CD8+</b>                        | -0.383 | 0.186  | -0.510 | -0.300 | 0.517  | -0.274 | 0.217   | 0.600  |
| <i>Sig.</i>                                 | 0.308  | 0.631  | 0.160  | 0.433  | 0.154  | 0.476  | 0.576   | 0.088  |
| <b>Effector-IFN<math>\gamma</math>+CD8+</b> | -0.200 | 0.434  | -0.577 | 0.191  | -0.209 | 0.143  | -0.313  | -0.052 |
| <i>Sig.</i>                                 | 0.606  | 0.243  | 0.104  | 0.622  | 0.590  | 0.714  | 0.412   | 0.894  |
| <b>Effector-Ki67+CD8+</b>                   | 0.483  | 0.017  | 0.611  | -0.167 | -0.050 | 0.164  | 0.133   | -0.033 |
| <i>Sig.</i>                                 | 0.187  | 0.965  | 0.081  | 0.668  | 0.898  | 0.673  | 0.732   | 0.932  |
| <b>Temra-CD8+</b>                           | 1.000  | 0.102  | 0.092  | -0.383 | -0.383 | 0.566  | -0.300  | -0.017 |
| <i>Sig.</i>                                 |        | 0.795  | 0.814  | 0.308  | 0.308  | 0.112  | 0.433   | 0.966  |
| <b>Temra-IFN<math>\gamma</math>+CD8+</b>    | 0.102  | 1.000  | -0.136 | -0.170 | -0.034 | 0.149  | -0.644  | -0.305 |
| <i>Sig.</i>                                 | 0.795  |        | 0.727  | 0.663  | 0.931  | 0.703  | 0.061   | 0.425  |
| <b>Temra-Ki67+CD8+</b>                      | 0.092  | -0.136 | 1.000  | 0.042  | 0.008  | -0.128 | 0.176   | -0.050 |
| <i>Sig.</i>                                 | 0.814  | 0.727  |        | 0.915  | 0.983  | 0.742  | 0.651   | 0.898  |
| <b>Perforin+CD8+</b>                        | -0.383 | -0.170 | 0.042  | 1.000  | -0.583 | 0.018  | 0.317   | -0.500 |
| <i>Sig.</i>                                 | 0.308  | 0.663  | 0.915  |        | 0.099  | 0.963  | 0.406   | 0.170  |
| <b>Granzyme B+CD8+</b>                      | -0.383 | -0.034 | 0.008  | -0.583 | 1.000  | -0.183 | 0.217   | 0.333  |
| <i>Sig.</i>                                 | 0.308  | 0.931  | 0.983  | 0.099  |        | 0.638  | 0.576   | 0.381  |
| <b>IFN<math>\gamma</math>+CD16+</b>         | 0.566  | 0.149  | -0.128 | 0.018  | -0.183 | 1.000  | -0.146  | -0.566 |
| <i>Sig.</i>                                 | 0.112  | 0.703  | 0.742  | 0.963  | 0.638  |        | 0.708   | 0.112  |
| <b>Perforin+CD16+</b>                       | -0.300 | -0.644 | 0.176  | 0.317  | 0.217  | -0.146 | 1.000   | 0.333  |
| <i>Sig.</i>                                 | 0.433  | 0.061  | 0.651  | 0.406  | 0.576  | 0.708  |         | 0.381  |
| <b>Granzyme B+CD16+</b>                     | -0.017 | -0.305 | -0.050 | -0.500 | 0.333  | -0.566 | 0.333   | 1.000  |
| <i>Sig.</i>                                 | 0.966  | 0.425  | 0.898  | 0.170  | 0.381  | 0.112  | 0.381   |        |

Notes to supplementary table 12: Significance is given by \*  $p < 0.05$  and \*\*  $p < 0.01$  (Spearman rank correlation).

**Supplementary Table 13. Correlation coefficient and significance (Sig.) of cellular parameters in patients on conv.**

|                                             | Age      | BMI     | CD69+CD4+ | IFN $\gamma$ +CD4+ | Ki67+CD4+ | Memory-CD4+ | Memory-IFN $\gamma$ +CD4+ | Memory-Ki67+CD4+ | Effector-CD4+ | Effector-IFN $\gamma$ +CD4+ | Effector-Ki67+CD4+ | Temra-CD4+ |
|---------------------------------------------|----------|---------|-----------|--------------------|-----------|-------------|---------------------------|------------------|---------------|-----------------------------|--------------------|------------|
| <b>Age</b>                                  | 1.000    | -0.500  | -0.317    | -0.383             | -0.083    | -0.033      | -0.733*                   | 0.117            | 0.067         | -0.479                      | 0.167              | 0.183      |
| <i>Sig.</i>                                 |          | 0.170   | 0.406     | 0.308              | 0.831     | 0.932       | 0.025                     | 0.765            | 0.865         | 0.192                       | 0.668              | 0.637      |
| <b>BMI</b>                                  | -0.500   | 1.000   | 0.133     | -0.333             | 0.467     | 0.633       | 0.700*                    | 0.450            | 0.017         | -0.174                      | 0.167              | -0.650     |
| <i>Sig.</i>                                 | 0.170    |         | 0.732     | 0.381              | 0.205     | 0.067       | 0.036                     | 0.224            | 0.966         | 0.654                       | 0.668              | 0.058      |
| <b>CD4+CD69+</b>                            | -0.317   | 0.133   | 1.000     | 0.133              | 0.367     | 0.117       | 0.450                     | -0.417           | 0.083         | 0.644                       | 0.067              | 0.117      |
| <i>Sig.</i>                                 | 0.406    | 0.732   |           | 0.732              | 0.332     | 0.765       | 0.224                     | 0.265            | 0.831         | 0.061                       | 0.865              | 0.765      |
| <b>IFN<math>\gamma</math>+CD4+</b>          | -0.383   | -0.333  | 0.133     | 1.000              | -0.517    | -0.800**    | 0.117                     | -0.350           | 0.450         | 0.775*                      | -0.867**           | 0.633      |
| <i>Sig.</i>                                 | 0.308    | 0.381   | 0.732     |                    | 0.154     | 0.010       | 0.765                     | 0.356            | 0.224         | 0.014                       | 0.002              | 0.067      |
| <b>Ki67+CD4+</b>                            | -0.083   | 0.467   | 0.367     | -0.517             | 1.000     | 0.633       | 0.467                     | 0.500            | -0.083        | -0.183                      | 0.467              | -0.450     |
| <i>Sig.</i>                                 | 0.831    | 0.205   | 0.332     | 0.154              |           | 0.067       | 0.205                     | 0.170            | 0.831         | 0.638                       | 0.205              | 0.224      |
| <b>Memory-CD4+</b>                          | -0.033   | 0.633   | 0.117     | -0.800**           | 0.633     | 1.000       | 0.367                     | 0.283            | -0.600        | -0.392                      | 0.683*             | -0.900**   |
| <i>Sig.</i>                                 | 0.932    | 0.067   | 0.765     | 0.010              | 0.067     |             | 0.332                     | 0.460            | 0.088         | 0.297                       | 0.042              | 0.001      |
| <b>Memory-IFN<math>\gamma</math>+CD4+</b>   | -0.733*  | 0.700*  | 0.450     | 0.117              | 0.467     | 0.367       | 1.000                     | 0.267            | 0.017         | 0.305                       | -0.183             | -0.500     |
| <i>Sig.</i>                                 | 0.025    | 0.036   | 0.224     | 0.765              | 0.205     | 0.332       |                           | 0.488            | 0.966         | 0.425                       | 0.637              | 0.170      |
| <b>Memory-Ki67+CD4+</b>                     | 0.117    | 0.450   | -0.417    | -0.350             | 0.500     | 0.283       | 0.267                     | 1.000            | 0.233         | -0.618                      | -0.017             | -0.383     |
| <i>Sig.</i>                                 | 0.765    | 0.224   | 0.265     | 0.356              | 0.170     | 0.460       | 0.488                     |                  | 0.546         | 0.076                       | 0.966              | 0.308      |
| <b>Effector-CD4+</b>                        | 0.067    | 0.017   | 0.083     | 0.450              | -0.083    | -0.600      | 0.017                     | 0.233            | 1.000         | 0.148                       | -0.600             | 0.617      |
| <i>Sig.</i>                                 | 0.865    | 0.966   | 0.831     | 0.224              | 0.831     | 0.088       | 0.966                     | 0.546            |               | 0.704                       | 0.088              | 0.077      |
| <b>Effector-IFN<math>\gamma</math>+CD4+</b> | -0.479   | -0.174  | 0.644     | 0.775*             | -0.183    | -0.392      | 0.305                     | -0.618           | 0.148         | 1.000                       | -0.514             | 0.418      |
| <i>Sig.</i>                                 | 0.192    | 0.654   | 0.061     | 0.014              | 0.638     | 0.297       | 0.425                     | 0.076            | 0.704         |                             | 0.157              | 0.263      |
| <b>Effector-Ki67+CD4+</b>                   | 0.167    | 0.167   | 0.067     | -0.867**           | 0.467     | 0.683*      | -0.183                    | -0.017           | -0.600        | -0.514                      | 1.000              | -0.450     |
| <i>Sig.</i>                                 | 0.668    | 0.668   | 0.865     | 0.002              | 0.205     | 0.042       | 0.637                     | 0.966            | 0.088         | 0.157                       |                    | 0.224      |
| <b>Temra-CD4+</b>                           | 0.183    | -0.650  | 0.117     | 0.633              | -0.450    | -0.900**    | -0.500                    | -0.383           | 0.617         | 0.418                       | -0.450             | 1.000      |
| <i>Sig.</i>                                 | 0.637    | 0.058   | 0.765     | 0.067              | 0.224     | 0.001       | 0.170                     | 0.308            | 0.077         | 0.263                       | 0.224              |            |
| <b>Temra-IFN<math>\gamma</math>+CD4+</b>    | 0.084    | -0.728* | -0.042    | 0.753*             | -0.661    | -0.678*     | -0.360                    | -0.552           | 0.017         | 0.621                       | -0.594             | 0.594      |
| <i>Sig.</i>                                 | 0.831    | 0.026   | 0.915     | 0.019              | 0.053     | 0.045       | 0.342                     | 0.123            | 0.966         | 0.075                       | 0.092              | 0.092      |
| <b>Temra-Ki67+CD4+</b>                      | -0.800** | 0.000   | 0.250     | 0.583              | -0.283    | -0.300      | 0.500                     | -0.383           | -0.100        | 0.548                       | -0.333             | 0.050      |
| <i>Sig.</i>                                 | 0.010    | 1.000   | 0.516     | 0.099              | 0.460     | 0.433       | 0.170                     | 0.308            | 0.798         | 0.126                       | 0.381              | 0.898      |
| <b>CD69+CD8+</b>                            | 0.333    | -0.400  | 0.250     | -0.217             | -0.283    | -0.150      | -0.517                    | -0.467           | -0.100        | -0.087                      | 0.400              | 0.367      |
| <i>Sig.</i>                                 | 0.381    | 0.286   | 0.516     | 0.576              | 0.460     | 0.700       | 0.154                     | 0.205            | 0.798         | 0.824                       | 0.286              | 0.332      |
| <b>IFN<math>\gamma</math>+CD8+</b>          | 0.533    | -0.250  | 0.167     | -0.317             | 0.600     | 0.217       | -0.067                    | 0.233            | 0.033         | -0.148                      | 0.200              | -0.067     |
| <i>Sig.</i>                                 | 0.139    | 0.516   | 0.668     | 0.406              | 0.088     | 0.576       | 0.865                     | 0.546            | 0.932         | 0.704                       | 0.606              | 0.865      |
| <b>Ki67+CD8+</b>                            | 0.700*   | -0.300  | -0.450    | -0.283             | 0.233     | 0.050       | -0.400                    | 0.583            | 0.000         | -0.470                      | 0.033              | 0.000      |
| <i>Sig.</i>                                 | 0.036    | 0.433   | 0.224     | 0.460              | 0.546     | 0.898       | 0.286                     | 0.099            | 1.000         | 0.202                       | 0.932              | 1.000      |
| <b>Memory-CD8+</b>                          | 0.150    | -0.067  | -0.183    | -0.600             | 0.267     | 0.583       | -0.033                    | -0.033           | -0.767*       | -0.409                      | 0.633              | -0.633     |
| <i>Sig.</i>                                 | 0.700    | 0.865   | 0.637     | 0.088              | 0.488     | 0.099       | 0.932                     | 0.932            | 0.016         | 0.274                       | 0.067              | 0.067      |
| <b>Memory-IFN<math>\gamma</math>+CD8+</b>   | 0.475    | -0.485  | -0.208    | 0.030              | 0.030     | -0.327      | -0.337                    | 0.396            | 0.168         | -0.228                      | -0.139             | 0.347      |
| <i>Sig.</i>                                 | 0.196    | 0.186   | 0.591     | 0.940              | 0.940     | 0.391       | 0.376                     | 0.291            | 0.665         | 0.556                       | 0.722              | 0.361      |
| <b>Memory-Ki67+CD8+</b>                     | 0.550    | 0.067   | -0.583    | -0.417             | 0.133     | 0.267       | -0.333                    | 0.633            | -0.100        | -0.592                      | 0.117              | -0.233     |
| <i>Sig.</i>                                 | 0.125    | 0.865   | 0.099     | 0.265              | 0.732     | 0.488       | 0.381                     | 0.067            | 0.798         | 0.093                       | 0.765              | 0.546      |
| <b>Effector-CD8+</b>                        | 0.433    | -0.183  | -0.267    | -0.283             | 0.267     | -0.067      | -0.550                    | 0.150            | 0.233         | -0.348                      | 0.333              | 0.283      |

|                                             |        |         |         |        |        |        |        |        |         |        |        |         |
|---------------------------------------------|--------|---------|---------|--------|--------|--------|--------|--------|---------|--------|--------|---------|
| <i>Sig.</i>                                 | 0.244  | 0.637   | 0.488   | 0.460  | 0.488  | 0.865  | 0.125  | 0.700  | 0.546   | 0.359  | 0.381  | 0.460   |
| <b>Effector-IFN<math>\gamma</math>+CD8+</b> | -0.274 | -0.073  | 0.183   | 0.456  | 0.292  | -0.073 | 0.347  | -0.018 | 0.018   | 0.563  | -0.383 | 0.018   |
| <i>Sig.</i>                                 | 0.476  | 0.852   | 0.638   | 0.217  | 0.446  | 0.852  | 0.360  | 0.963  | 0.963   | 0.115  | 0.308  | 0.963   |
| <b>Effector-Ki67+CD8+</b>                   | 0.133  | -0.700* | 0.267   | 0.550  | -0.083 | -0.467 | -0.033 | -0.300 | 0.067   | 0.557  | -0.450 | 0.417   |
| <i>Sig.</i>                                 | 0.732  | 0.036   | 0.488   | 0.125  | 0.831  | 0.205  | 0.932  | 0.433  | 0.865   | 0.119  | 0.224  | 0.265   |
| <b>Temra-CD8+</b>                           | 0.317  | -0.367  | 0.200   | 0.233  | -0.367 | -0.500 | -0.550 | -0.333 | 0.400   | 0.218  | -0.117 | 0.750*  |
| <i>Sig.</i>                                 | 0.406  | 0.332   | 0.606   | 0.546  | 0.332  | 0.170  | 0.125  | 0.381  | 0.286   | 0.574  | 0.765  | 0.020   |
| <b>Temra-IFN<math>\gamma</math>+CD8+</b>    | -0.165 | -0.261  | -0.061  | -0.104 | -0.061 | -0.052 | -0.044 | -0.296 | -0.287  | -0.136 | 0.322  | -0.070  |
| <i>Sig.</i>                                 | 0.671  | 0.497   | 0.876   | 0.789  | 0.876  | 0.894  | 0.911  | 0.439  | 0.454   | 0.726  | 0.398  | 0.859   |
| <b>Temra-Ki67+CD8+</b>                      | -0.083 | 0.383   | 0.083   | -0.367 | 0.767* | 0.633  | 0.600  | 0.583  | -0.283  | -0.191 | 0.167  | -0.700* |
| <i>Sig.</i>                                 | 0.831  | 0.308   | 0.831   | 0.332  | 0.016  | 0.067  | 0.088  | 0.099  | 0.460   | 0.622  | 0.668  | 0.036   |
| <b>Perforin+CD8+</b>                        | 0.600  | 0.067   | 0.100   | -0.583 | 0.150  | 0.433  | -0.367 | 0.050  | -0.183  | -0.313 | 0.450  | -0.133  |
| <i>Sig.</i>                                 | 0.088  | 0.865   | 0.798   | 0.099  | 0.700  | 0.244  | 0.332  | 0.898  | 0.637   | 0.412  | 0.224  | 0.732   |
| <b>Granzyme B+CD8+</b>                      | 0.433  | -0.300  | 0.183   | 0.083  | -0.300 | -0.367 | -0.517 | -0.200 | 0.367   | 0.078  | -0.067 | 0.617   |
| <i>Sig.</i>                                 | 0.244  | 0.433   | 0.637   | 0.831  | 0.433  | 0.332  | 0.154  | 0.606  | 0.332   | 0.841  | 0.865  | 0.077   |
| <b>IFN<math>\gamma</math>+CD16+</b>         | -0.350 | 0.233   | 0.517   | 0.600  | 0.033  | -0.400 | 0.450  | -0.050 | 0.800** | 0.592  | -0.633 | 0.417   |
| <i>Sig.</i>                                 | 0.356  | 0.546   | 0.154   | 0.088  | 0.932  | 0.286  | 0.224  | 0.898  | 0.010   | 0.093  | 0.067  | 0.265   |
| <b>Perforin+CD16+</b>                       | 0.100  | 0.333   | -0.733* | -0.333 | -0.083 | 0.300  | -0.200 | 0.483  | -0.250  | -0.557 | 0.150  | -0.383  |
| <i>Sig.</i>                                 | 0.798  | 0.381   | 0.025   | 0.381  | 0.831  | 0.433  | 0.606  | 0.187  | 0.516   | 0.119  | 0.700  | 0.308   |
| <b>Granzyme B+CD16+</b>                     | 0.517  | -0.050  | -0.717* | -0.333 | -0.083 | 0.167  | -0.517 | 0.417  | -0.200  | -0.540 | 0.133  | -0.150  |
| <i>Sig.</i>                                 | 0.154  | 0.898   | 0.030   | 0.381  | 0.831  | 0.668  | 0.154  | 0.265  | 0.606   | 0.134  | 0.732  | 0.700   |

**Supplementary Table 13 (continued). Correlation coefficient and significance (Sig.) of cellular parameters in patients on conv**

|                                           | Temra-IFN $\gamma$ +CD4+ | Temra-Ki67+CD4+ | CD69+CD8+ | IFN $\gamma$ +CD8+ | Ki67+CD8+ | Memory-CD8+ | Memory-IFN $\gamma$ +CD8+ | Memory-Ki67+CD8+ | Effector-CD8+ | Effector-IFN $\gamma$ +CD8+ | Effector-Ki67+CD8+ |
|-------------------------------------------|--------------------------|-----------------|-----------|--------------------|-----------|-------------|---------------------------|------------------|---------------|-----------------------------|--------------------|
| <b>Age</b>                                | 0.084                    | -0.800**        | 0.333     | 0.533              | 0.700*    | 0.150       | 0.475                     | 0.550            | 0.433         | -0.274                      | 0.133              |
| <i>Sig.</i>                               | 0.831                    | 0.010           | 0.381     | 0.139              | 0.036     | 0.700       | 0.196                     | 0.125            | 0.244         | 0.476                       | 0.732              |
| <b>BMI</b>                                | -0.728*                  | 0.000           | -0.400    | -0.250             | -0.300    | -0.067      | -0.485                    | 0.067            | -0.183        | -0.073                      | -0.700*            |
| <i>Sig.</i>                               | 0.026                    | 1.000           | 0.286     | 0.516              | 0.433     | 0.865       | 0.186                     | 0.865            | 0.637         | 0.852                       | 0.036              |
| <b>CD4+CD69+</b>                          | -0.042                   | 0.250           | 0.250     | 0.167              | -0.450    | -0.183      | -0.208                    | -0.583           | -0.267        | 0.183                       | 0.267              |
| <i>Sig.</i>                               | 0.915                    | 0.516           | 0.516     | 0.668              | 0.224     | 0.637       | 0.591                     | 0.099            | 0.488         | 0.638                       | 0.488              |
| <b>IFN<math>\gamma</math>+CD4+</b>        | 0.753*                   | 0.583           | -0.217    | -0.317             | -0.283    | -0.600      | 0.030                     | -0.417           | -0.283        | 0.456                       | 0.550              |
| <i>Sig.</i>                               | 0.019                    | 0.099           | 0.576     | 0.406              | 0.460     | 0.088       | 0.940                     | 0.265            | 0.460         | 0.217                       | 0.125              |
| <b>Ki67+CD4+</b>                          | -0.661                   | -0.283          | -0.283    | 0.600              | 0.233     | 0.267       | 0.030                     | 0.133            | 0.267         | 0.292                       | -0.083             |
| <i>Sig.</i>                               | 0.053                    | 0.460           | 0.460     | 0.088              | 0.546     | 0.488       | 0.940                     | 0.732            | 0.488         | 0.446                       | 0.831              |
| <b>Memory-CD4+</b>                        | -0.678*                  | -0.300          | -0.150    | 0.217              | 0.050     | 0.583       | -0.327                    | 0.267            | -0.067        | -0.073                      | -0.467             |
| <i>Sig.</i>                               | 0.045                    | 0.433           | 0.700     | 0.576              | 0.898     | 0.099       | 0.391                     | 0.488            | 0.865         | 0.852                       | 0.205              |
| <b>Memory-IFN<math>\gamma</math>+CD4+</b> | -0.360                   | 0.500           | -0.517    | -0.067             | -0.400    | -0.033      | -0.337                    | -0.333           | -0.550        | 0.347                       | -0.033             |
| <i>Sig.</i>                               | 0.342                    | 0.170           | 0.154     | 0.865              | 0.286     | 0.932       | 0.376                     | 0.381            | 0.125         | 0.360                       | 0.932              |

|                                             |        |         |         |        |         |         |        |         |        |         |        |
|---------------------------------------------|--------|---------|---------|--------|---------|---------|--------|---------|--------|---------|--------|
| <b>Memory-Ki67+CD4+</b>                     | -0.552 | -0.383  | -0.467  | 0.233  | 0.583   | -0.033  | 0.396  | 0.633   | 0.150  | -0.018  | -0.300 |
| <i>Sig.</i>                                 | 0.123  | 0.308   | 0.205   | 0.546  | 0.099   | 0.932   | 0.291  | 0.067   | 0.700  | 0.963   | 0.433  |
| <b>Effector-CD4+</b>                        | 0.017  | -0.100  | -0.100  | 0.033  | 0.000   | -0.767* | 0.168  | -0.100  | 0.233  | 0.018   | 0.067  |
| <i>Sig.</i>                                 | 0.966  | 0.798   | 0.798   | 0.932  | 1.000   | 0.016   | 0.665  | 0.798   | 0.546  | 0.963   | 0.865  |
| <b>Effector-IFN<math>\gamma</math>+CD4+</b> | 0.621  | 0.548   | -0.087  | -0.148 | -0.470  | -0.409  | -0.228 | -0.592  | -0.348 | 0.563   | 0.557  |
| <i>Sig.</i>                                 | 0.075  | 0.126   | 0.824   | 0.704  | 0.202   | 0.274   | 0.556  | 0.093   | 0.359  | 0.115   | 0.119  |
| <b>Effector-Ki67+CD4+</b>                   | -0.594 | -0.333  | 0.400   | 0.200  | 0.033   | 0.633   | -0.139 | 0.117   | 0.333  | -0.383  | -0.450 |
| <i>Sig.</i>                                 | 0.092  | 0.381   | 0.286   | 0.606  | 0.932   | 0.067   | 0.722  | 0.765   | 0.381  | 0.308   | 0.224  |
| <b>Temra-CD4+</b>                           | 0.594  | 0.050   | 0.367   | -0.067 | 0.000   | -0.633  | 0.347  | -0.233  | 0.283  | 0.018   | 0.417  |
| <i>Sig.</i>                                 | 0.092  | 0.898   | 0.332   | 0.865  | 1.000   | 0.067   | 0.361  | 0.546   | 0.460  | 0.963   | 0.265  |
| <b>Temra-IFN<math>\gamma</math>+CD4+</b>    | 1.000  | 0.268   | 0.059   | -0.151 | 0.059   | -0.276  | 0.229  | -0.109  | -0.192 | 0.358   | 0.678* |
| <i>Sig.</i>                                 |        | 0.486   | 0.881   | 0.699  | 0.881   | 0.472   | 0.554  | 0.781   | 0.620  | 0.345   | 0.045  |
| <b>Temra-Ki67+CD4+</b>                      | 0.268  | 1.000   | -0.100  | -0.467 | -0.700* | -0.017  | -0.297 | -0.750* | -0.600 | 0.201   | 0.267  |
| <i>Sig.</i>                                 | 0.486  |         | 0.798   | 0.205  | 0.036   | 0.966   | 0.438  | 0.020   | 0.088  | 0.604   | 0.488  |
| <b>CD69+CD8+</b>                            | 0.059  | -0.100  | 1.000   | -0.167 | -0.100  | -0.050  | 0.257  | -0.133  | -0.033 | -0.730* | -0.083 |
| <i>Sig.</i>                                 | 0.881  | 0.798   |         | 0.668  | 0.798   | 0.898   | 0.504  | 0.732   | 0.932  | 0.025   | 0.831  |
| <b>IFN<math>\gamma</math>+CD8+</b>          | -0.151 | -0.467  | -0.167  | 1.000  | 0.517   | 0.400   | 0.248  | 0.133   | 0.433  | 0.402   | 0.483  |
| <i>Sig.</i>                                 | 0.699  | 0.205   | 0.668   |        | 0.154   | 0.286   | 0.521  | 0.732   | 0.244  | 0.284   | 0.187  |
| <b>Ki67+CD8+</b>                            | 0.059  | -0.700* | -0.100  | 0.517  | 1.000   | 0.067   | 0.772* | 0.850** | 0.350  | 0.073   | 0.183  |
| <i>Sig.</i>                                 | 0.881  | 0.036   | 0.798   | 0.154  |         | 0.865   | 0.015  | 0.004   | 0.356  | 0.852   | 0.637  |
| <b>Memory-CD8+</b>                          | -0.276 | -0.017  | -0.050  | 0.400  | 0.067   | 1.000   | -0.218 | -0.017  | 0.067  | 0.037   | 0.033  |
| <i>Sig.</i>                                 | 0.472  | 0.966   | 0.898   | 0.286  | 0.865   |         | 0.573  | 0.966   | 0.865  | 0.926   | 0.932  |
| <b>Memory-IFN<math>\gamma</math>+CD8+</b>   | 0.229  | -0.297  | 0.257   | 0.248  | 0.772*  | -0.218  | 1.000  | 0.525   | 0.050  | -0.130  | 0.347  |
| <i>Sig.</i>                                 | 0.554  | 0.438   | 0.504   | 0.521  | 0.015   | 0.573   |        | 0.147   | 0.899  | 0.739   | 0.361  |
| <b>Memory-Ki67+CD8+</b>                     | -0.109 | -0.750* | -0.133  | 0.133  | 0.850** | -0.017  | 0.525  | 1.000   | 0.250  | -0.146  | -0.283 |
| <i>Sig.</i>                                 | 0.781  | 0.020   | 0.732   | 0.732  | 0.004   | 0.966   | 0.147  |         | 0.516  | 0.708   | 0.460  |
| <b>Effector-CD8+</b>                        | -0.192 | -0.600  | -0.033  | 0.433  | 0.350   | 0.067   | 0.050  | 0.250   | 1.000  | 0.091   | -0.133 |
| <i>Sig.</i>                                 | 0.620  | 0.088   | 0.932   | 0.244  | 0.356   | 0.865   | 0.899  | 0.516   |        | 0.815   | 0.732  |
| <b>Effector-IFN<math>\gamma</math>+CD8+</b> | 0.358  | 0.201   | -0.730* | 0.402  | 0.073   | 0.037   | -0.130 | -0.146  | 0.091  | 1.000   | 0.602  |
| <i>Sig.</i>                                 | 0.345  | 0.604   | 0.025   | 0.284  | 0.852   | 0.926   | 0.739  | 0.708   | 0.815  |         | 0.086  |
| <b>Effector-Ki67+CD8+</b>                   | 0.678* | 0.267   | -0.083  | 0.483  | 0.183   | 0.033   | 0.347  | -0.283  | -0.133 | 0.602   | 1.000  |
| <i>Sig.</i>                                 | 0.045  | 0.488   | 0.831   | 0.187  | 0.637   | 0.932   | 0.361  | 0.460   | 0.732  | 0.086   |        |
| <b>Temra-CD8+</b>                           | 0.360  | -0.283  | 0.667*  | -0.250 | 0.083   | -0.683* | 0.366  | 0.100   | 0.167  | -0.383  | -0.017 |
| <i>Sig.</i>                                 | 0.342  | 0.460   | 0.050   | 0.516  | 0.831   | 0.042   | 0.332  | 0.798   | 0.668  | 0.308   | 0.966  |
| <b>Temra-IFN<math>\gamma</math>+CD8+</b>    | -0.127 | 0.479   | 0.139   | 0.104  | -0.400  | 0.635   | -0.279 | -0.601  | 0.078  | -0.067  | 0.148  |
| <i>Sig.</i>                                 | 0.745  | 0.192   | 0.721   | 0.789  | 0.286   | 0.066   | 0.467  | 0.087   | 0.841  | 0.865   | 0.704  |
| <b>Temra-Ki67+CD8+</b>                      | -0.427 | -0.083  | -0.583  | 0.583  | 0.333   | 0.483   | 0.059  | 0.217   | -0.117 | 0.456   | 0.150  |
| <i>Sig.</i>                                 | 0.252  | 0.831   | 0.099   | 0.099  | 0.381   | 0.187   | 0.879  | 0.576   | 0.765  | 0.217   | 0.700  |
| <b>Perforin+CD8+</b>                        | -0.184 | -0.767* | 0.483   | 0.133  | 0.417   | -0.033  | 0.238  | 0.583   | 0.117  | -0.456  | -0.333 |
| <i>Sig.</i>                                 | 0.635  | 0.016   | 0.187   | 0.732  | 0.265   | 0.932   | 0.538  | 0.099   | 0.765  | 0.217   | 0.381  |
| <b>Granzyme B+CD8+</b>                      | 0.251  | -0.400  | 0.700*  | -0.183 | 0.200   | -0.633  | 0.455  | 0.233   | 0.083  | -0.493  | -0.067 |
| <i>Sig.</i>                                 | 0.515  | 0.286   | 0.036   | 0.637  | 0.606   | 0.067   | 0.218  | 0.546   | 0.831  | 0.178   | 0.865  |

|                                     |        |         |        |        |        |         |        |         |        |        |        |
|-------------------------------------|--------|---------|--------|--------|--------|---------|--------|---------|--------|--------|--------|
| <b>IFN<math>\gamma</math>+CD16+</b> | 0.067  | 0.250   | -0.250 | -0.033 | -0.400 | -0.700* | -0.218 | -0.467  | -0.100 | 0.310  | 0.183  |
| <i>Sig.</i>                         | 0.864  | 0.516   | 0.516  | 0.932  | 0.286  | 0.036   | 0.573  | 0.205   | 0.798  | 0.416  | 0.637  |
| <b>Perforin+CD16+</b>               | -0.176 | -0.400  | -0.250 | -0.367 | 0.400  | 0.017   | 0.079  | 0.783*  | 0.150  | -0.219 | -0.633 |
| <i>Sig.</i>                         | 0.651  | 0.286   | 0.516  | 0.332  | 0.286  | 0.966   | 0.839  | 0.013   | 0.700  | 0.571  | 0.067  |
| <b>Granzyme B+CD16+</b>             | 0.050  | -0.683* | -0.117 | -0.017 | 0.733* | 0.033   | 0.366  | 0.933** | 0.350  | -0.128 | -0.317 |
| <i>Sig.</i>                         | 0.898  | 0.042   | 0.765  | 0.966  | 0.025  | 0.932   | 0.332  | 0.000   | 0.356  | 0.743  | 0.406  |

**Supplementary Table 13 (continued). Correlation coefficient and significance (Sig.) of cellular parameters in patients on conv**

|                                             | Temra-CD8+ | Temra-IFN $\gamma$ +CD8+ | Temra-Ki67+CD8+ | Perforin+CD8+ | Granzyme B+CD8+ | IFN $\gamma$ +CD16+ | Perforin+CD16+ | Granzyme B+CD16+ |
|---------------------------------------------|------------|--------------------------|-----------------|---------------|-----------------|---------------------|----------------|------------------|
| <b>Age</b>                                  | 0.150      | 0.186                    | -0.536          | 0.100         | -0.067          | 0.274               | 0.367          | 0.133            |
| <i>Sig.</i>                                 | 0.406      | 0.671                    | 0.831           | 0.088         | 0.244           | 0.356               | 0.798          | 0.154            |
| <b>BMI</b>                                  | 0.000      | -0.356                   | 0.209           | -0.150        | 0.100           | -0.420              | 0.117          | 0.233            |
| <i>Sig.</i>                                 | 0.332      | 0.497                    | 0.308           | 0.865         | 0.433           | 0.546               | 0.381          | 0.898            |
| <b>CD4+CD69+</b>                            | 0.509      | 0.207                    | 0.221           | -0.186        | -0.186          | 0.594               | -0.661         | -0.627           |
| <i>Sig.</i>                                 | 0.606      | 0.876                    | 0.831           | 0.798         | 0.637           | 0.154               | 0.025          | 0.030            |
| <b>IFN<math>\gamma</math>+CD4+</b>          | 0.267      | -0.068                   | 0.209           | 0.483         | -0.683*         | 0.475               | -0.333         | -0.633           |
| <i>Sig.</i>                                 | 0.546      | 0.789                    | 0.332           | 0.099         | 0.831           | 0.088               | 0.381          | 0.381            |
| <b>Ki67+CD4+</b>                            | 0.233      | -0.254                   | 0.603           | 0.033         | 0.183           | 0.402               | 0.450          | -0.250           |
| <i>Sig.</i>                                 | 0.332      | 0.876                    | 0.016           | 0.700         | 0.433           | 0.932               | 0.831          | 0.831            |
| <b>Memory-CD4+</b>                          | -0.250     | -0.051                   | -0.259          | 0.600         | -0.433          | -0.055              | -0.083         | -0.517           |
| <i>Sig.</i>                                 | 0.170      | 0.894                    | 0.067           | 0.244         | 0.332           | 0.286               | 0.433          | 0.668            |
| <b>Memory-IFN<math>\gamma</math>+CD4+</b>   | 0.288      | -0.017                   | -0.136          | 0.170         | -0.576          | 0.297               | -0.542         | -0.356           |
| <i>Sig.</i>                                 | 0.125      | 0.911                    | 0.088           | 0.332         | 0.154           | 0.224               | 0.606          | 0.154            |
| <b>Memory-Ki67+CD4+</b>                     | 0.183      | -0.373                   | 0.636           | 0.183         | 0.100           | 0.347               | 0.567          | -0.267           |
| <i>Sig.</i>                                 | 0.381      | 0.439                    | 0.099           | 0.898         | 0.606           | 0.898               | 0.187          | 0.265            |
| <b>Effector-CD4+</b>                        | -0.133     | -0.119                   | -0.377          | -0.550        | 0.700*          | 0.055               | 0.250          | 0.567            |
| <i>Sig.</i>                                 | 0.286      | 0.454                    | 0.460           | 0.637         | 0.332           | 0.010               | 0.516          | 0.606            |
| <b>Effector-IFN<math>\gamma</math>+CD4+</b> | 0.441      | 0.103                    | 0.511           | 0.373         | -0.559          | 0.539               | -0.254         | -0.746*          |
| <i>Sig.</i>                                 | 0.574      | 0.726                    | 0.622           | 0.412         | 0.841           | 0.093               | 0.119          | 0.134            |
| <b>Effector-Ki67+CD4+</b>                   | 0.410      | -0.017                   | 0.748*          | 0.293         | -0.427          | 0.312               | 0.025          | -0.435           |
| <i>Sig.</i>                                 | 0.765      | 0.398                    | 0.668           | 0.224         | 0.865           | 0.067               | 0.700          | 0.732            |
| <b>Temra-CD4+</b>                           | -0.417     | -0.678*                  | 0.293           | 0.317         | 0.150           | -0.164              | 0.650          | 0.267            |
| <i>Sig.</i>                                 | 0.020      | 0.859                    | 0.036           | 0.732         | 0.077           | 0.265               | 0.308          | 0.700            |
| <b>Temra-IFN<math>\gamma</math>+CD4+</b>    | -0.018     | 0.130                    | 0.550           | 0.511         | -0.292          | 0.400               | 0.000          | -0.639           |
| <i>Sig.</i>                                 | 0.342      | 0.745                    | 0.252           | 0.635         | 0.515           | 0.864               | 0.651          | 0.898            |
| <b>Temra-Ki67+CD4+</b>                      | -0.009     | -0.221                   | 0.638           | 0.453         | -0.122          | 0.391               | 0.279          | -0.557           |
| <i>Sig.</i>                                 | 0.460      | 0.192                    | 0.831           | 0.016         | 0.286           | 0.516               | 0.286          | 0.042            |

|                                             |        |        |        |        |        |        |                |        |
|---------------------------------------------|--------|--------|--------|--------|--------|--------|----------------|--------|
| <b>CD69+CD8+</b>                            | 0.477  | 0.281  | 0.147  | -0.335 | -0.075 | 0.458  | <b>-0.753*</b> | -0.544 |
| Sig.                                        | 0.050  | 0.721  | 0.099  | 0.187  | 0.036  | 0.516  | <b>0.516</b>   | 0.765  |
| <b>IFN<math>\gamma</math>+CD8+</b>          | -0.033 | 0.458  | -0.251 | 0.050  | -0.317 | -0.037 | -0.450         | 0.117  |
| Sig.                                        | 0.516  | 0.789  | 0.099  | 0.732  | 0.637  | 0.932  | 0.332          | 0.966  |
| <b>Ki67+CD8+</b>                            | 0.417  | 0.000  | 0.619  | -0.317 | 0.250  | 0.183  | 0.383          | 0.200  |
| Sig.                                        | 0.831  | 0.286  | 0.381  | 0.265  | 0.606  | 0.286  | 0.286          | 0.025  |
| <b>Memory-CD8+</b>                          | -0.217 | -0.288 | -0.561 | 0.017  | 0.167  | 0.237  | -0.150         | -0.283 |
| Sig.                                        | 0.042  | 0.066  | 0.187  | 0.932  | 0.067  | 0.036  | 0.966          | 0.932  |
| <b>Memory-IFN<math>\gamma</math>+CD8+</b>   | -0.218 | 0.416  | -0.262 | 0.104  | -0.035 | 0.086  | -0.104         | 0.122  |
| Sig.                                        | 0.332  | 0.467  | 0.879  | 0.538  | 0.218  | 0.573  | 0.839          | 0.332  |
| <b>Memory-Ki67+CD8+</b>                     | 0.333  | -0.356 | 0.611  | 0.367  | -0.417 | 0.183  | 0.433          | -0.067 |
| Sig.                                        | 0.798  | 0.087  | 0.576  | 0.099  | 0.546  | 0.205  | 0.013          | 0.000  |
| <b>Effector-CD8+</b>                        | -0.383 | 0.186  | -0.510 | -0.300 | 0.517  | -0.274 | 0.217          | 0.600  |
| Sig.                                        | 0.668  | 0.841  | 0.765  | 0.765  | 0.831  | 0.798  | 0.700          | 0.356  |
| <b>Effector-IFN<math>\gamma</math>+CD8+</b> | -0.200 | 0.434  | -0.577 | 0.191  | -0.209 | 0.143  | -0.313         | -0.052 |
| Sig.                                        | 0.308  | 0.865  | 0.217  | 0.217  | 0.178  | 0.416  | 0.571          | 0.743  |
| <b>Effector-Ki67+CD8+</b>                   | 0.483  | 0.017  | 0.611  | -0.167 | -0.050 | 0.164  | 0.133          | -0.033 |
| Sig.                                        | 0.966  | 0.704  | 0.700  | 0.381  | 0.865  | 0.637  | 0.067          | 0.406  |
| <b>Temra-CD8+</b>                           | 1.000  | 0.102  | 0.092  | -0.383 | -0.383 | 0.566  | -0.300         | -0.017 |
| Sig.                                        |        | 0.221  | 0.020  | 0.187  | 0.000  | 0.606  | 0.865          | 0.732  |
| <b>Temra-IFN<math>\gamma</math>+CD8+</b>    | 0.102  | 1.000  | -0.136 | -0.170 | -0.034 | 0.149  | -0.644         | -0.305 |
| Sig.                                        | 0.221  |        | 1.000  | 0.112  | 0.141  | 0.497  | 0.286          | 0.183  |
| <b>Temra-Ki67+CD8+</b>                      | 0.092  | -0.136 | 1.000  | 0.042  | 0.008  | -0.128 | 0.176          | -0.050 |
| Sig.                                        | 0.020  | 1.000  |        | 0.865  | 0.067  | 0.765  | 0.966          | 1.000  |
| <b>Perforin+CD8+</b>                        | -0.383 | -0.170 | 0.042  | 1.000  | -0.583 | 0.018  | 0.317          | -0.500 |
| Sig.                                        | 0.187  | 0.112  | 0.865  |        | 0.067  | 0.406  | 0.433          | 0.170  |
| <b>Granzyme B+CD8+</b>                      | -0.383 | -0.034 | 0.008  | -0.583 | 1.000  | -0.183 | 0.217          | 0.333  |
| Sig.                                        | 0.000  | 0.141  | 0.067  | 0.067  |        | 0.732  | 0.966          | 0.606  |
| <b>IFN<math>\gamma</math>+CD16+</b>         | 0.566  | 0.149  | -0.128 | 0.018  | -0.183 | 1.000  | -0.146         | -0.566 |
| Sig.                                        | 0.606  | 0.497  | 0.765  | 0.406  | 0.732  |        | 0.170          | 0.112  |
| <b>Perforin+CD16+</b>                       | -0.300 | -0.644 | 0.176  | 0.317  | 0.217  | -0.146 | 1.000          | 0.333  |
| Sig.                                        | 0.865  | 0.286  | 0.966  | 0.433  | 0.966  | 0.170  |                | 0.002  |
| <b>Granzyme B+CD16+</b>                     | -0.017 | -0.305 | -0.050 | -0.500 | 0.333  | -0.566 | 0.333          | 1.000  |
| Sig.                                        | 0.732  | 0.183  | 1.000  | 0.170  | 0.606  | 0.112  | 0.002          |        |

Notes to supplementary table 13: Significance is given by \* p<0.05 and \*\*p<0.01 (Spearman rank correlation).

Supplementary Table 14. Correlation coefficient and significance (Sig.) of cytokines in patients on mAb

|                   |                               | Stimulation |        |         |        |        |         |              |              |         |         |         | IL-22   |
|-------------------|-------------------------------|-------------|--------|---------|--------|--------|---------|--------------|--------------|---------|---------|---------|---------|
|                   |                               | IL-5        | IL-13  | IL-2    | IL-6   | IL-9   | IL-10   | IFN $\gamma$ | TNF $\alpha$ | IL-17A  | IL-17F  | IL-4    |         |
| Spike Stimulation | <b>IL-5</b>                   | 1.00        | 0.167  | 0.050   | 0.067  | -0.017 | 0.533   | 0.30         | 0.30         | 0.583   | 0.150   | -0.250  | 0.483   |
|                   | <i>Sig.</i>                   |             | 0.668  | 0.898   | 0.865  | 0.966  | 0.139   | 0.433        | 0.433        | 0.099   | 0.70    | 0.516   | 0.187   |
|                   | <b>IL-13</b>                  | 0.167       | 1.00   | 0.70*   | -0.150 | -0.450 | 0.40    | 0.40         | 0.650        | 0.583   | 0.517   | 0.433   | 0.533   |
|                   | <i>Sig.</i>                   | 0.668       |        | 0.036   | 0.70   | 0.224  | 0.286   | 0.286        | 0.058        | 0.099   | 0.154   | 0.244   | 0.139   |
|                   | <b>IL-2</b>                   | 0.050       | 0.70*  | 1.00    | -0.017 | 0.133  | 0.283   | 0.550        | 0.650        | 0.650   | 0.633   | 0.283   | 0.583   |
|                   | <i>Sig.</i>                   | 0.898       | 0.036  |         | 0.966  | 0.732  | 0.460   | 0.125        | 0.058        | 0.058   | 0.067   | 0.460   | 0.099   |
|                   | <b>IL-6</b>                   | 0.067       | -0.150 | -0.017  | 1.00   | 0.317  | 0.50    | 0.533        | 0.567        | 0.433   | 0.617   | 0.333   | 0.467   |
|                   | <i>Sig.</i>                   | 0.865       | 0.70   | 0.966   |        | 0.406  | 0.170   | 0.139        | 0.112        | 0.244   | 0.077   | 0.381   | 0.205   |
|                   | <b>IL-9</b>                   | -0.017      | -0.450 | 0.133   | 0.317  | 1.00   | -0.333  | 0.183        | -0.033       | -0.050  | -0.10   | 0.083   | -0.183  |
|                   | <i>Sig.</i>                   | 0.966       | 0.224  | 0.732   | 0.406  |        | 0.381   | 0.637        | 0.932        | 0.898   | 0.798   | 0.831   | 0.637   |
|                   | <b>IL-10</b>                  | 0.533       | 0.40   | 0.283   | 0.50   | -0.333 | 1.00    | 0.683*       | 0.717*       | 0.817** | 0.783*  | -0.033  | 0.850** |
|                   | <i>Sig.</i>                   | 0.139       | 0.286  | 0.460   | 0.170  | 0.381  |         | 0.042        | 0.030        | 0.07    | 0.013   | 0.932   | 0.04    |
|                   | <b>IFN<math>\gamma</math></b> | 0.30        | 0.40   | 0.550   | 0.533  | 0.183  | 0.683*  | 1.00         | 0.80**       | 0.80**  | 0.683*  | 0.067   | 0.717*  |
|                   | <i>Sig.</i>                   | 0.433       | 0.286  | 0.125   | 0.139  | 0.637  | 0.042   |              | 0.010        | 0.010   | 0.042   | 0.865   | 0.030   |
|                   | <b>TNF<math>\alpha</math></b> | 0.30        | 0.650  | 0.650   | 0.567  | -0.033 | 0.717*  | 0.80**       | 1.00         | 0.90**  | 0.867** | 0.333   | 0.883** |
|                   | <i>Sig.</i>                   | 0.433       | 0.058  | 0.058   | 0.112  | 0.932  | 0.030   | 0.010        |              | 0.01    | 0.02    | 0.381   | 0.02    |
|                   | <b>IL-17A</b>                 | 0.583       | 0.583  | 0.650   | 0.433  | -0.050 | 0.817** | 0.80**       | 0.90**       | 1.00    | 0.833** | 0.10    | 0.967** |
|                   | <i>Sig.</i>                   | 0.099       | 0.099  | 0.058   | 0.244  | 0.898  | 0.07    | 0.010        | 0.01         |         | 0.05    | 0.798   | 0.00    |
|                   | <b>IL-17F</b>                 | 0.150       | 0.517  | 0.633   | 0.617  | -0.10  | 0.783*  | 0.683*       | 0.867**      | 0.833** | 1.00    | 0.367   | 0.883** |
|                   | <i>Sig.</i>                   | 0.70        | 0.154  | 0.067   | 0.077  | 0.798  | 0.013   | 0.042        | 0.02         | 0.05    |         | 0.332   | 0.02    |
| <b>IL-4</b>       | -0.250                        | 0.433       | 0.283  | 0.333   | 0.083  | -0.033 | 0.067   | 0.333        | 0.10         | 0.367   | 1.00    | 0.050   |         |
| <i>Sig.</i>       | 0.516                         | 0.244       | 0.460  | 0.381   | 0.831  | 0.932  | 0.865   | 0.381        | 0.798        | 0.332   |         | 0.898   |         |
| No stimulation    | <b>IL-22</b>                  | 0.483       | 0.533  | 0.583   | 0.467  | -0.183 | 0.850** | 0.717*       | 0.883**      | 0.967** | 0.883** | 0.050   | 1.00    |
|                   | <i>Sig.</i>                   | 0.187       | 0.139  | 0.099   | 0.205  | 0.637  | 0.04    | 0.030        | 0.02         | 0.00    | 0.02    | 0.898   |         |
|                   | <b>IL-5</b>                   | 0.126       | 0.787* | 0.912** | 0.042  | 0.075  | 0.402   | 0.720*       | 0.711*       | 0.669*  | 0.603   | 0.326   | 0.552   |
|                   | <i>Sig.</i>                   | 0.748       | 0.012  | 0.01    | 0.915  | 0.847  | 0.284   | 0.029        | 0.032        | 0.049   | 0.086   | 0.391   | 0.123   |
|                   | <b>IL-13</b>                  | -0.529      | -0.128 | -0.219  | 0.475  | -0.274 | 0.128   | 0.128        | 0.201        | -0.018  | 0.274   | 0.037   | 0.164   |
|                   | <i>Sig.</i>                   | 0.143       | 0.743  | 0.571   | 0.197  | 0.476  | 0.743   | 0.743        | 0.604        | 0.963   | 0.476   | 0.926   | 0.673   |
|                   | <b>IL-2</b>                   | 0.479       | -0.091 | 0.046   | -0.388 | 0.091  | 0.137   | 0.297        | -0.160       | 0.137   | -0.274  | -0.730* | 0.023   |
|                   | <i>Sig.</i>                   | 0.192       | 0.815  | 0.907   | 0.302  | 0.815  | 0.725   | 0.438        | 0.681        | 0.725   | 0.476   | 0.025   | 0.954   |
|                   | <b>IL-6</b>                   | -0.186      | -0.661 | -0.339  | 0.203  | 0.475  | -0.305  | 0.017        | -0.170       | -0.254  | -0.339  | -0.542  | -0.220  |
|                   | <i>Sig.</i>                   | 0.631       | 0.053  | 0.372   | 0.60   | 0.197  | 0.425   | 0.965        | 0.663        | 0.509   | 0.372   | 0.131   | 0.569   |
|                   | <b>IL-9</b>                   | -0.09       | -0.385 | -0.324  | 0.114  | 0.00   | 0.096   | 0.315        | -0.157       | -0.017  | -0.149  | -0.533  | 0.00    |
|                   | <i>Sig.</i>                   | 0.982       | 0.307  | 0.396   | 0.771  | 1.00   | 0.806   | 0.409        | 0.686        | 0.964   | 0.703   | 0.139   | 1.00    |
|                   | <b>IL-10</b>                  | -0.217      | -0.467 | -0.033  | 0.450  | 0.483  | 0.033   | 0.483        | 0.117        | 0.083   | 0.083   | -0.383  | 0.10    |
|                   | <i>Sig.</i>                   | 0.576       | 0.205  | 0.932   | 0.224  | 0.187  | 0.932   | 0.187        | 0.765        | 0.831   | 0.831   | 0.308   | 0.798   |
|                   | <b>IFN<math>\gamma</math></b> | 0.017       | -0.153 | 0.017   | -0.102 | 0.170  | 0.051   | 0.271        | -0.271       | -0.051  | -0.085  | -0.119  | -0.153  |
|                   | <i>Sig.</i>                   | 0.965       | 0.695  | 0.965   | 0.795  | 0.663  | 0.897   | 0.480        | 0.480        | 0.897   | 0.828   | 0.761   | 0.695   |
|                   | <b>TNF<math>\alpha</math></b> | -0.297      | 0.297  | 0.593   | 0.639  | 0.297  | 0.320   | 0.730*       | 0.707*       | 0.525   | 0.730*  | 0.434   | 0.525   |
| <i>Sig.</i>       | 0.438                         | 0.438       | 0.092  | 0.064   | 0.438  | 0.402  | 0.025   | 0.033        | 0.147        | 0.025   | 0.244   | 0.147   |         |
| <b>IL-17A</b>     | -0.137                        | 0.137       | 0.274  | 0.548   | 0.137  | 0.274  | 0.548   | 0.411        | 0.411        | 0.548   | 0.411   | 0.411   |         |

|               |        |        |       |        |        |        |        |        |        |        |        |       |
|---------------|--------|--------|-------|--------|--------|--------|--------|--------|--------|--------|--------|-------|
| <i>Sig.</i>   | 0.725  | 0.725  | 0.476 | 0.127  | 0.725  | 0.476  | 0.127  | 0.272  | 0.272  | 0.127  | 0.272  | 0.272 |
| <b>IL-17F</b> | 0.548  | 0.548  | 0.411 | -0.411 | -0.548 | 0.548  | 0.274  | 0.274  | 0.548  | 0.274  | -0.411 | 0.548 |
| <i>Sig.</i>   | 0.127  | 0.127  | 0.272 | 0.272  | 0.127  | 0.127  | 0.476  | 0.476  | 0.127  | 0.476  | 0.272  | 0.127 |
| <b>IL-4</b>   | -0.119 | -0.208 | 0.238 | 0.386  | 0.663  | 0.030  | 0.673* | 0.218  | 0.188  | 0.129  | -0.099 | 0.079 |
| <i>Sig.</i>   | 0.761  | 0.591  | 0.538 | 0.305  | 0.051  | 0.940  | 0.047  | 0.573  | 0.628  | 0.741  | 0.80   | 0.839 |
| <b>IL-22</b>  | 0.00   | 0.113  | 0.322 | -0.540 | -0.070 | -0.322 | -0.505 | -0.174 | -0.052 | -0.087 | -0.122 | 0.09  |
| <i>Sig.</i>   | 1.00   | 0.772  | 0.398 | 0.134  | 0.859  | 0.398  | 0.166  | 0.654  | 0.894  | 0.824  | 0.755  | 0.982 |

**Supplementary Table 14 (continued). Correlation coefficient and significance (Sig.) of cytokines in patients on mAb**

|                   |                               | No stimulation |         |        |        |        |        |              |              |        |        |        |        |
|-------------------|-------------------------------|----------------|---------|--------|--------|--------|--------|--------------|--------------|--------|--------|--------|--------|
|                   |                               | IL-5           | IL-13   | IL-2   | IL-6   | IL-9   | IL-10  | IFN $\gamma$ | TNF $\alpha$ | IL-17A | IL-17F | IL-4   |        |
| Spike Stimulation | <b>IL-5</b>                   | 0.126          | -0.529  | 0.479  | -0.186 | -0.009 | -0.217 | 0.017        | -0.297       | -0.137 | 0.548  | -0.119 | 0.000  |
|                   | <i>Sig.</i>                   | 0.748          | 0.143   | 0.192  | 0.631  | 0.982  | 0.576  | 0.965        | 0.438        | 0.725  | 0.127  | 0.761  | 1.000  |
|                   | <b>IL-13</b>                  | 0.787*         | -0.128  | -0.091 | -0.661 | -0.385 | -0.467 | -0.153       | 0.297        | 0.137  | 0.548  | -0.208 | 0.113  |
|                   | <i>Sig.</i>                   | 0.012          | 0.743   | 0.815  | 0.053  | 0.307  | 0.205  | 0.695        | 0.438        | 0.725  | 0.127  | 0.591  | 0.772  |
|                   | <b>IL-2</b>                   | 0.912**        | -0.219  | 0.046  | -0.339 | -0.324 | -0.033 | 0.017        | 0.593        | 0.274  | 0.411  | 0.238  | 0.322  |
|                   | <i>Sig.</i>                   | 0.001          | 0.571   | 0.907  | 0.372  | 0.396  | 0.932  | 0.965        | 0.092        | 0.476  | 0.272  | 0.538  | 0.398  |
|                   | <b>IL-6</b>                   | 0.042          | 0.475   | -0.388 | 0.203  | 0.114  | 0.450  | -0.102       | 0.639        | 0.548  | -0.411 | 0.386  | -0.540 |
|                   | <i>Sig.</i>                   | 0.915          | 0.197   | 0.302  | 0.600  | 0.771  | 0.224  | 0.795        | 0.064        | 0.127  | 0.272  | 0.305  | 0.134  |
|                   | <b>IL-9</b>                   | 0.075          | -0.274  | 0.091  | 0.475  | 0.000  | 0.483  | 0.170        | 0.297        | 0.137  | -0.548 | 0.663  | -0.070 |
|                   | <i>Sig.</i>                   | 0.847          | 0.476   | 0.815  | 0.197  | 1.000  | 0.187  | 0.663        | 0.438        | 0.725  | 0.127  | 0.051  | 0.859  |
|                   | <b>IL-10</b>                  | 0.402          | 0.128   | 0.137  | -0.305 | 0.096  | 0.033  | 0.051        | 0.320        | 0.274  | 0.548  | 0.030  | -0.322 |
|                   | <i>Sig.</i>                   | 0.284          | 0.743   | 0.725  | 0.425  | 0.806  | 0.932  | 0.897        | 0.402        | 0.476  | 0.127  | 0.940  | 0.398  |
|                   | <b>IFN<math>\gamma</math></b> | 0.720*         | 0.128   | 0.297  | 0.017  | 0.315  | 0.483  | 0.271        | 0.730*       | 0.548  | 0.274  | 0.673* | -0.505 |
|                   | <i>Sig.</i>                   | 0.029          | 0.743   | 0.438  | 0.965  | 0.409  | 0.187  | 0.480        | 0.025        | 0.127  | 0.476  | 0.047  | 0.166  |
|                   | <b>TNF<math>\alpha</math></b> | 0.711*         | 0.201   | -0.160 | -0.170 | -0.157 | 0.117  | -0.271       | 0.707*       | 0.411  | 0.274  | 0.218  | -0.174 |
|                   | <i>Sig.</i>                   | 0.032          | 0.604   | 0.681  | 0.663  | 0.686  | 0.765  | 0.480        | 0.033        | 0.272  | 0.476  | 0.573  | 0.654  |
|                   | <b>IL-17A</b>                 | 0.669*         | -0.018  | 0.137  | -0.254 | -0.017 | 0.083  | -0.051       | 0.525        | 0.411  | 0.548  | 0.188  | -0.052 |
|                   | <i>Sig.</i>                   | 0.049          | 0.963   | 0.725  | 0.509  | 0.964  | 0.831  | 0.897        | 0.147        | 0.272  | 0.127  | 0.628  | 0.894  |
|                   | <b>IL-17F</b>                 | 0.603          | 0.274   | -0.274 | -0.339 | -0.149 | 0.083  | -0.085       | 0.730*       | 0.548  | 0.274  | 0.129  | -0.087 |
|                   | <i>Sig.</i>                   | 0.086          | 0.476   | 0.476  | 0.372  | 0.703  | 0.831  | 0.828        | 0.025        | 0.127  | 0.476  | 0.741  | 0.824  |
| <b>IL-4</b>       | 0.326                         | 0.037          | -0.730* | -0.542 | -0.533 | -0.383 | -0.119 | 0.434        | 0.411        | -0.411 | -0.099 | -0.122 |        |
| <i>Sig.</i>       | 0.391                         | 0.926          | 0.025   | 0.131  | 0.139  | 0.308  | 0.761  | 0.244        | 0.272        | 0.272  | 0.800  | 0.755  |        |
| No stimulation    | <b>IL-22</b>                  | 0.552          | 0.164   | 0.023  | -0.220 | 0.000  | 0.100  | -0.153       | 0.525        | 0.411  | 0.548  | 0.079  | 0.009  |
|                   | <i>Sig.</i>                   | 0.123          | 0.673   | 0.954  | 0.569  | 1.000  | 0.798  | 0.695        | 0.147        | 0.272  | 0.127  | 0.839  | 0.982  |
|                   | <b>IL-5</b>                   | 1.000          | -0.238  | 0.160  | -0.383 | -0.224 | -0.025 | 0.145        | 0.596        | 0.275  | 0.413  | 0.348  | -0.031 |
|                   | <i>Sig.</i>                   |                | 0.537   | 0.680  | 0.309  | 0.563  | 0.949  | 0.710        | 0.090        | 0.474  | 0.270  | 0.359  | 0.938  |
|                   | <b>IL-13</b>                  | -0.238         | 1.000   | -0.450 | 0.353  | 0.412  | 0.493  | -0.223       | 0.475        | 0.450  | -0.300 | 0.130  | -0.315 |
|                   | <i>Sig.</i>                   | 0.537          |         | 0.224  | 0.352  | 0.271  | 0.178  | 0.564        | 0.196        | 0.224  | 0.433  | 0.739  | 0.410  |
|                   | <b>IL-2</b>                   | 0.160          | -0.450  | 1.000  | 0.186  | 0.527  | 0.274  | 0.557        | -0.281       | -0.188 | 0.563  | 0.380  | -0.107 |
|                   | <i>Sig.</i>                   | 0.680          | 0.224   |        | 0.632  | 0.145  | 0.476  | 0.119        | 0.463        | 0.629  | 0.115  | 0.314  | 0.784  |
| <b>IL-6</b>       | -0.383                        | 0.353          | 0.186   | 1.000  | 0.445  | 0.780* | -0.190 | 0.070        | -0.139       | -0.418 | 0.493  | -0.142 |        |
| <i>Sig.</i>       | 0.309                         | 0.352          | 0.632   |        | 0.230  | 0.013  | 0.625  | 0.859        | 0.721        | 0.263  | 0.177  | 0.716  |        |

|                               |        |        |        |        |        |         |        |        |        |        |         |        |
|-------------------------------|--------|--------|--------|--------|--------|---------|--------|--------|--------|--------|---------|--------|
| <b>IL-9</b>                   | -0.224 | 0.412  | 0.527  | 0.445  | 1.000  | 0.717*  | 0.569  | 0.120  | 0.431  | 0.072  | 0.556   | -0.493 |
| <i>Sig.</i>                   | 0.563  | 0.271  | 0.145  | 0.230  |        | 0.030   | 0.110  | 0.759  | 0.247  | 0.854  | 0.120   | 0.177  |
| <b>IL-10</b>                  | -0.025 | 0.493  | 0.274  | 0.780* | 0.717* | 1.000   | 0.254  | 0.525  | 0.411  | -0.274 | 0.842** | -0.409 |
| <i>Sig.</i>                   | 0.949  | 0.178  | 0.476  | 0.013  | 0.030  |         | 0.509  | 0.147  | 0.272  | 0.476  | 0.004   | 0.274  |
| <b>IFN<math>\gamma</math></b> | 0.145  | -0.223 | 0.557  | -0.190 | 0.569  | 0.254   | 1.000  | 0.070  | 0.418  | 0.139  | 0.504   | -0.390 |
| <i>Sig.</i>                   | 0.710  | 0.564  | 0.119  | 0.625  | 0.110  | 0.509   |        | 0.859  | 0.263  | 0.721  | 0.167   | 0.300  |
| <b>TNF<math>\alpha</math></b> | 0.596  | 0.475  | -0.281 | 0.070  | 0.120  | 0.525   | 0.070  | 1.000  | 0.750* | -0.188 | 0.624   | -0.298 |
| <i>Sig.</i>                   | 0.090  | 0.196  | 0.463  | 0.859  | 0.759  | 0.147   | 0.859  |        | 0.020  | 0.629  | 0.073   | 0.436  |
| <b>IL-17A</b>                 | 0.275  | 0.450  | -0.188 | -0.139 | 0.431  | 0.411   | 0.418  | 0.750* | 1.000  | -0.125 | 0.488   | -0.358 |
| <i>Sig.</i>                   | 0.474  | 0.224  | 0.629  | 0.721  | 0.247  | 0.272   | 0.263  | 0.020  |        | 0.749  | 0.183   | 0.345  |
| <b>IL-17F</b>                 | 0.413  | -0.300 | 0.563  | -0.418 | 0.072  | -0.274  | 0.139  | -0.188 | -0.125 | 1.000  | -0.244  | 0.286  |
| <i>Sig.</i>                   | 0.270  | 0.433  | 0.115  | 0.263  | 0.854  | 0.476   | 0.721  | 0.629  | 0.749  |        | 0.527   | 0.456  |
| <b>IL-4</b>                   | 0.348  | 0.130  | 0.380  | 0.493  | 0.556  | 0.842** | 0.504  | 0.624  | 0.488  | -0.244 | 1.000   | -0.517 |
| <i>Sig.</i>                   | 0.359  | 0.739  | 0.314  | 0.177  | 0.120  | 0.004   | 0.167  | 0.073  | 0.183  | 0.527  |         | 0.154  |
| <b>IL-22</b>                  | -0.031 | -0.315 | -0.107 | -0.142 | -0.493 | -0.409  | -0.390 | -0.298 | -0.358 | 0.286  | -0.517  | 1.000  |
| <i>Sig.</i>                   | 0.938  | 0.410  | 0.784  | 0.716  | 0.177  | 0.274   | 0.300  | 0.436  | 0.345  | 0.456  | 0.154   |        |

Notes to supplementary table 14: Significance is given by \*  $p < 0.05$  and \*\*  $p < 0.01$  (Spearman rank correlation).

**Supplementary Table 15. Correlation coefficient and significance (Sig.) of cytokines in patients on conv**

|                   |                               | Stimulation |         |         |        |          |         |              |              |         |         |        | IL-22  |
|-------------------|-------------------------------|-------------|---------|---------|--------|----------|---------|--------------|--------------|---------|---------|--------|--------|
|                   |                               | IL-5        | IL-13   | IL-2    | IL-6   | IL-9     | IL-10   | IFN $\gamma$ | TNF $\alpha$ | IL-17A  | IL-17F  | IL-4   |        |
| Spike Stimulation | <b>IL-5</b>                   | 1.000       | 0.583   | 0.500   | 0.467  | -0.800** | 0.200   | 0.200        | 0.350        | 0.517   | 0.467   | 0.433  | 0.767* |
|                   | <i>Sig.</i>                   |             | 0.099   | 0.170   | 0.205  | 0.010    | 0.606   | 0.606        | 0.356        | 0.154   | 0.205   | 0.244  | 0.016  |
|                   | <b>IL-13</b>                  | 0.583       | 1.000   | 0.617   | 0.650  | -0.500   | 0.667*  | 0.400        | 0.450        | 0.517   | 0.683*  | 0.750* | 0.733* |
|                   | <i>Sig.</i>                   | 0.099       |         | 0.077   | 0.058  | 0.170    | 0.050   | 0.286        | 0.224        | 0.154   | 0.042   | 0.020  | 0.025  |
|                   | <b>IL-2</b>                   | 0.500       | 0.617   | 1.000   | 0.333  | -0.583   | 0.800** | 0.650        | 0.500        | 0.600   | 0.933** | 0.583  | 0.733* |
|                   | <i>Sig.</i>                   | 0.170       | 0.077   |         | 0.381  | 0.099    | 0.010   | 0.058        | 0.170        | 0.088   | 0.000   | 0.099  | 0.025  |
|                   | <b>IL-6</b>                   | 0.467       | 0.650   | 0.333   | 1.000  | -0.317   | 0.433   | 0.117        | 0.733*       | 0.783*  | 0.467   | 0.250  | 0.700* |
|                   | <i>Sig.</i>                   | 0.205       | 0.058   | 0.381   |        | 0.406    | 0.244   | 0.765        | 0.025        | 0.013   | 0.205   | 0.516  | 0.036  |
|                   | <b>IL-9</b>                   | -0.800**    | -0.500  | -0.583  | -0.317 | 1.000    | -0.350  | -0.317       | -0.283       | -0.333  | -0.517  | -0.167 | -0.650 |
|                   | <i>Sig.</i>                   | 0.010       | 0.170   | 0.099   | 0.406  |          | 0.356   | 0.406        | 0.460        | 0.381   | 0.154   | 0.668  | 0.058  |
|                   | <b>IL-10</b>                  | 0.200       | 0.667*  | 0.800** | 0.433  | -0.350   | 1.000   | 0.600        | 0.500        | 0.483   | 0.733*  | 0.467  | 0.683* |
|                   | <i>Sig.</i>                   | 0.606       | 0.050   | 0.010   | 0.244  | 0.356    |         | 0.088        | 0.170        | 0.187   | 0.025   | 0.205  | 0.042  |
|                   | <b>IFN<math>\gamma</math></b> | 0.200       | 0.400   | 0.650   | 0.117  | -0.317   | 0.600   | 1.000        | 0.650        | 0.550   | 0.683*  | 0.300  | 0.500  |
|                   | <i>Sig.</i>                   | 0.606       | 0.286   | 0.058   | 0.765  | 0.406    | 0.088   |              | 0.058        | 0.125   | 0.042   | 0.433  | 0.170  |
|                   | <b>TNF<math>\alpha</math></b> | 0.350       | 0.450   | 0.500   | 0.733* | -0.283   | 0.500   | 0.650        | 1.000        | 0.950** | 0.667*  | 0.200  | 0.650  |
|                   | <i>Sig.</i>                   | 0.356       | 0.224   | 0.170   | 0.025  | 0.460    | 0.170   | 0.058        |              | 0.000   | 0.050   | 0.606  | 0.058  |
|                   | <b>IL-17A</b>                 | 0.517       | 0.517   | 0.600   | 0.783* | -0.333   | 0.483   | 0.550        | 0.950**      | 1.000   | 0.733*  | 0.350  | 0.750* |
|                   | <i>Sig.</i>                   | 0.154       | 0.154   | 0.088   | 0.013  | 0.381    | 0.187   | 0.125        | 0.000        |         | 0.025   | 0.356  | 0.020  |
| <b>IL-17F</b>     | 0.467                         | 0.683*      | 0.933** | 0.467   | -0.517 | 0.733*   | 0.683*  | 0.667*       | 0.733*       | 1.000   | 0.650   | 0.667* |        |
| <i>Sig.</i>       | 0.205                         | 0.042       | 0.000   | 0.205   | 0.154  | 0.025    | 0.042   | 0.050        | 0.025        |         | 0.058   | 0.050  |        |
| <b>IL-4</b>       | 0.433                         | 0.750*      | 0.583   | 0.250   | -0.167 | 0.467    | 0.300   | 0.200        | 0.350        | 0.650   | 1.000   | 0.417  |        |
| <i>Sig.</i>       | 0.244                         | 0.020       | 0.099   | 0.516   | 0.668  | 0.205    | 0.433   | 0.606        | 0.356        | 0.058   |         | 0.265  |        |
| No stimulation    | <b>IL-22</b>                  | 0.767*      | 0.733*  | 0.733*  | 0.700* | -0.650   | 0.683*  | 0.500        | 0.650        | 0.750*  | 0.667*  | 0.417  | 1.000  |
|                   | <i>Sig.</i>                   | 0.016       | 0.025   | 0.025   | 0.036  | 0.058    | 0.042   | 0.170        | 0.058        | 0.020   | 0.050   | 0.265  |        |
|                   | <b>IL-5</b>                   | 0.661       | 0.559   | 0.339   | 0.644  | -0.407   | 0.356   | -0.102       | 0.203        | 0.390   | 0.203   | 0.271  | 0.780* |
|                   | <i>Sig.</i>                   | 0.053       | 0.117   | 0.372   | 0.061  | 0.277    | 0.347   | 0.795        | 0.600        | 0.300   | 0.600   | 0.480  | 0.013  |
|                   | <b>IL-13</b>                  | -0.390      | -0.170  | -0.237  | 0.441  | 0.424    | 0.085   | -0.458       | 0.102        | 0.102   | -0.237  | -0.356 | -0.034 |
|                   | <i>Sig.</i>                   | 0.300       | 0.663   | 0.539   | 0.235  | 0.256    | 0.828   | 0.215        | 0.795        | 0.795   | 0.539   | 0.347  | 0.931  |
|                   | <b>IL-2</b>                   | 0.322       | -0.186  | -0.288  | 0.102  | -0.407   | -0.271  | -0.051       | 0.051        | -0.017  | -0.390  | -0.644 | 0.220  |
|                   | <i>Sig.</i>                   | 0.398       | 0.631   | 0.452   | 0.795  | 0.277    | 0.480   | 0.897        | 0.897        | 0.965   | 0.300   | 0.061  | 0.569  |
|                   | <b>IL-6</b>                   | 0.467       | -0.117  | -0.033  | -0.050 | -0.383   | -0.017  | -0.283       | -0.217       | -0.133  | -0.267  | -0.167 | 0.283  |
|                   | <i>Sig.</i>                   | 0.205       | 0.765   | 0.932   | 0.898  | 0.308    | 0.966   | 0.460        | 0.576        | 0.732   | 0.488   | 0.668  | 0.460  |
|                   | <b>IL-9</b>                   | 0.228       | -0.297  | -0.158  | 0.317  | -0.277   | -0.139  | -0.307       | 0.248        | 0.228   | -0.158  | -0.495 | 0.119  |
|                   | <i>Sig.</i>                   | 0.556       | 0.438   | 0.684   | 0.406  | 0.470    | 0.722   | 0.422        | 0.521        | 0.556   | 0.684   | 0.175  | 0.761  |
|                   | <b>IL-10</b>                  | 0.667*      | 0.333   | 0.167   | 0.500  | -0.317   | 0.033   | -0.267       | 0.067        | 0.300   | 0.033   | 0.167  | 0.617  |
|                   | <i>Sig.</i>                   | 0.050       | 0.381   | 0.668   | 0.170  | 0.406    | 0.932   | 0.488        | 0.865        | 0.433   | 0.932   | 0.668  | 0.077  |
|                   | <b>IFN<math>\gamma</math></b> | -0.117      | -0.233  | -0.517  | -0.150 | 0.433    | -0.333  | -0.417       | -0.433       | -0.367  | -0.683* | -0.233 | -0.083 |
|                   | <i>Sig.</i>                   | 0.765       | 0.546   | 0.154   | 0.700  | 0.244    | 0.381   | 0.265        | 0.244        | 0.332   | 0.042   | 0.546  | 0.831  |
|                   | <b>TNF<math>\alpha</math></b> | 0.109       | 0.010   | -0.287  | 0.574  | 0.040    | -0.109  | -0.693*      | 0.010        | 0.099   | -0.287  | -0.238 | 0.129  |
|                   | <i>Sig.</i>                   | 0.780       | 0.980   | 0.454   | 0.106  | 0.919    | 0.780   | 0.038        | 0.980        | 0.800   | 0.454   | 0.538  | 0.741  |
| <b>IL-17A</b>     | 0.495                         | 0.059       | 0.109   | 0.406   | -0.188 | 0.129    | -0.218  | 0.158        | 0.317        | -0.069  | -0.050  | 0.564  |        |

|  |               |       |        |        |       |        |        |          |        |        |        |        |        |
|--|---------------|-------|--------|--------|-------|--------|--------|----------|--------|--------|--------|--------|--------|
|  | <i>Sig.</i>   | 0.175 | 0.879  | 0.780  | 0.278 | 0.628  | 0.741  | 0.573    | 0.684  | 0.406  | 0.859  | 0.899  | 0.113  |
|  | <b>IL-17F</b> | 0.000 | -0.411 | -0.548 | 0.274 | 0.274  | -0.411 | -0.411   | 0.137  | 0.137  | -0.548 | -0.548 | 0.000  |
|  | <i>Sig.</i>   | 1.000 | 0.272  | 0.127  | 0.476 | 0.476  | 0.272  | 0.272    | 0.725  | 0.725  | 0.127  | 0.127  | 1.000  |
|  | <b>IL-4</b>   | 0.279 | 0.148  | 0.157  | 0.592 | -0.139 | 0.296  | -0.209   | 0.235  | 0.348  | 0.000  | -0.174 | 0.574  |
|  | <i>Sig.</i>   | 0.468 | 0.704  | 0.687  | 0.093 | 0.721  | 0.439  | 0.590    | 0.543  | 0.359  | 1.000  | 0.654  | 0.106  |
|  | <b>IL-22</b>  | 0.017 | -0.235 | -0.453 | 0.209 | -0.078 | -0.435 | -0.844** | -0.331 | -0.270 | -0.453 | -0.444 | -0.226 |
|  | <i>Sig.</i>   | 0.965 | 0.543  | 0.221  | 0.590 | 0.841  | 0.242  | 0.004    | 0.385  | 0.483  | 0.221  | 0.231  | 0.558  |

**Supplementary Table 15 (continued). Correlation coefficient and significance (Sig.) of cytokines in patients on conv**

|                   |                               | No stimulation |        |        |        |        |         |              |              |        |        |         |          |
|-------------------|-------------------------------|----------------|--------|--------|--------|--------|---------|--------------|--------------|--------|--------|---------|----------|
|                   |                               | IL-5           | IL-13  | IL-2   | IL-6   | IL-9   | IL-10   | IFN $\gamma$ | TNF $\alpha$ | IL-17A | IL-17F | IL-4    | IL-22    |
| Spike Stimulation | <b>IL-5</b>                   | 0.661          | -0.390 | 0.322  | 0.467  | 0.228  | 0.667*  | -0.117       | 0.109        | 0.495  | 0.000  | 0.279   | 0.017    |
|                   | <i>Sig.</i>                   | 0.053          | 0.300  | 0.398  | 0.205  | 0.556  | 0.050   | 0.765        | 0.780        | 0.175  | 1.000  | 0.468   | 0.965    |
|                   | <b>IL-13</b>                  | 0.559          | -0.170 | -0.186 | -0.117 | -0.297 | 0.333   | -0.233       | 0.010        | 0.059  | -0.411 | 0.148   | -0.235   |
|                   | <i>Sig.</i>                   | 0.117          | 0.663  | 0.631  | 0.765  | 0.438  | 0.381   | 0.546        | 0.980        | 0.879  | 0.272  | 0.704   | 0.543    |
|                   | <b>IL-2</b>                   | 0.339          | -0.237 | -0.288 | -0.033 | -0.158 | 0.167   | -0.517       | -0.287       | 0.109  | -0.548 | 0.157   | -0.453   |
|                   | <i>Sig.</i>                   | 0.372          | 0.539  | 0.452  | 0.932  | 0.684  | 0.668   | 0.154        | 0.454        | 0.780  | 0.127  | 0.687   | 0.221    |
|                   | <b>IL-6</b>                   | 0.644          | 0.441  | 0.102  | -0.050 | 0.317  | 0.500   | -0.150       | 0.574        | 0.406  | 0.274  | 0.592   | 0.209    |
|                   | <i>Sig.</i>                   | 0.061          | 0.235  | 0.795  | 0.898  | 0.406  | 0.170   | 0.700        | 0.106        | 0.278  | 0.476  | 0.093   | 0.590    |
|                   | <b>IL-9</b>                   | -0.407         | 0.424  | -0.407 | -0.383 | -0.277 | -0.317  | 0.433        | 0.040        | -0.188 | 0.274  | -0.139  | -0.078   |
|                   | <i>Sig.</i>                   | 0.277          | 0.256  | 0.277  | 0.308  | 0.470  | 0.406   | 0.244        | 0.919        | 0.628  | 0.476  | 0.721   | 0.841    |
|                   | <b>IL-10</b>                  | 0.356          | 0.085  | -0.271 | -0.017 | -0.139 | 0.033   | -0.333       | -0.109       | 0.129  | -0.411 | 0.296   | -0.435   |
|                   | <i>Sig.</i>                   | 0.347          | 0.828  | 0.480  | 0.966  | 0.722  | 0.932   | 0.381        | 0.780        | 0.741  | 0.272  | 0.439   | 0.242    |
|                   | <b>IFN<math>\gamma</math></b> | -0.102         | -0.458 | -0.051 | -0.283 | -0.307 | -0.267  | -0.417       | -0.693*      | -0.218 | -0.411 | -0.209  | -0.844** |
|                   | <i>Sig.</i>                   | 0.795          | 0.215  | 0.897  | 0.460  | 0.422  | 0.488   | 0.265        | 0.038        | 0.573  | 0.272  | 0.590   | 0.004    |
|                   | <b>TNF<math>\alpha</math></b> | 0.203          | 0.102  | 0.051  | -0.217 | 0.248  | 0.067   | -0.433       | 0.010        | 0.158  | 0.137  | 0.235   | -0.331   |
|                   | <i>Sig.</i>                   | 0.600          | 0.795  | 0.897  | 0.576  | 0.521  | 0.865   | 0.244        | 0.980        | 0.684  | 0.725  | 0.543   | 0.385    |
|                   | <b>IL-17A</b>                 | 0.390          | 0.102  | -0.017 | -0.133 | 0.228  | 0.300   | -0.367       | 0.099        | 0.317  | 0.137  | 0.348   | -0.270   |
|                   | <i>Sig.</i>                   | 0.300          | 0.795  | 0.965  | 0.732  | 0.556  | 0.433   | 0.332        | 0.800        | 0.406  | 0.725  | 0.359   | 0.483    |
|                   | <b>IL-17F</b>                 | 0.203          | -0.237 | -0.390 | -0.267 | -0.158 | 0.033   | -0.683*      | -0.287       | -0.069 | -0.548 | 0.000   | -0.453   |
|                   | <i>Sig.</i>                   | 0.600          | 0.539  | 0.300  | 0.488  | 0.684  | 0.932   | 0.042        | 0.454        | 0.859  | 0.127  | 1.000   | 0.221    |
| <b>IL-4</b>       | 0.271                         | -0.356         | -0.644 | -0.167 | -0.495 | 0.167  | -0.233  | -0.238       | -0.050       | -0.548 | -0.174 | -0.444  |          |
| <i>Sig.</i>       | 0.480                         | 0.347          | 0.061  | 0.668  | 0.175  | 0.668  | 0.546   | 0.538        | 0.899        | 0.127  | 0.654  | 0.231   |          |
| No stimulation    | <b>IL-22</b>                  | 0.780*         | -0.034 | 0.220  | 0.283  | 0.119  | 0.617   | -0.083       | 0.129        | 0.564  | 0.000  | 0.574   | -0.226   |
|                   | <i>Sig.</i>                   | 0.013          | 0.931  | 0.569  | 0.460  | 0.761  | 0.077   | 0.831        | 0.741        | 0.113  | 1.000  | 0.106   | 0.558    |
|                   | <b>IL-5</b>                   | 1.000          | 0.276  | 0.293  | 0.475  | 0.161  | 0.932** | 0.390        | 0.564        | 0.796* | 0.279  | 0.823** | 0.230    |
|                   | <i>Sig.</i>                   |                | 0.472  | 0.444  | 0.197  | 0.679  | 0.000   | 0.300        | 0.114        | 0.010  | 0.468  | 0.006   | 0.551    |
|                   | <b>IL-13</b>                  | 0.276          | 1.000  | -0.017 | -0.017 | 0.383  | 0.220   | 0.271        | 0.786*       | 0.383  | 0.557  | 0.682*  | 0.513    |
|                   | <i>Sig.</i>                   | 0.472          |        | 0.965  | 0.965  | 0.309  | 0.569   | 0.480        | 0.012        | 0.309  | 0.119  | 0.043   | 0.157    |
|                   | <b>IL-2</b>                   | 0.293          | -0.017 | 1.000  | 0.525  | 0.504  | 0.356   | 0.339        | 0.242        | 0.413  | 0.557  | 0.372   | 0.319    |
|                   | <i>Sig.</i>                   | 0.444          | 0.965  |        | 0.146  | 0.167  | 0.347   | 0.372        | 0.531        | 0.269  | 0.119  | 0.324   | 0.403    |
| <b>IL-6</b>       | 0.475                         | -0.017         | 0.525  | 1.000  | 0.574  | 0.500  | 0.350   | 0.347        | 0.753*       | 0.411  | 0.461  | 0.287   |          |
| <i>Sig.</i>       | 0.197                         | 0.965          | 0.146  |        | 0.106  | 0.170  | 0.356   | 0.361        | 0.019        | 0.272  | 0.211  | 0.454   |          |

|                               |         |        |       |        |        |         |        |         |         |       |         |         |
|-------------------------------|---------|--------|-------|--------|--------|---------|--------|---------|---------|-------|---------|---------|
| <b>IL-9</b>                   | 0.161   | 0.383  | 0.504 | 0.574  | 1.000  | 0.198   | -0.129 | 0.606   | 0.524   | 0.651 | 0.440   | 0.579   |
| <i>Sig.</i>                   | 0.679   | 0.309  | 0.167 | 0.106  |        | 0.610   | 0.741  | 0.084   | 0.148   | 0.058 | 0.237   | 0.102   |
| <b>IL-10</b>                  | 0.932** | 0.220  | 0.356 | 0.500  | 0.198  | 1.000   | 0.500  | 0.574   | 0.822** | 0.411 | 0.766*  | 0.331   |
| <i>Sig.</i>                   | 0.000   | 0.569  | 0.347 | 0.170  | 0.610  |         | 0.170  | 0.106   | 0.007   | 0.272 | 0.016   | 0.385   |
| <b>IFN<math>\gamma</math></b> | 0.390   | 0.271  | 0.339 | 0.350  | -0.129 | 0.500   | 1.000  | 0.307   | 0.495   | 0.548 | 0.426   | 0.131   |
| <i>Sig.</i>                   | 0.300   | 0.480  | 0.372 | 0.356  | 0.741  | 0.170   |        | 0.422   | 0.175   | 0.127 | 0.252   | 0.738   |
| <b>TNF<math>\alpha</math></b> | 0.564   | 0.786* | 0.242 | 0.347  | 0.606  | 0.574   | 0.307  | 1.000   | 0.606   | 0.651 | 0.734*  | 0.817** |
| <i>Sig.</i>                   | 0.114   | 0.012  | 0.531 | 0.361  | 0.084  | 0.106   | 0.422  |         | 0.084   | 0.058 | 0.024   | 0.007   |
| <b>IL-17A</b>                 | 0.796*  | 0.383  | 0.413 | 0.753* | 0.524  | 0.822** | 0.495  | 0.606   | 1.000   | 0.651 | 0.858** | 0.253   |
| <i>Sig.</i>                   | 0.010   | 0.309  | 0.269 | 0.019  | 0.148  | 0.007   | 0.175  | 0.084   |         | 0.058 | 0.003   | 0.511   |
| <b>IL-17F</b>                 | 0.279   | 0.557  | 0.557 | 0.411  | 0.651  | 0.411   | 0.548  | 0.651   | 0.651   | 1.000 | 0.572   | 0.429   |
| <i>Sig.</i>                   | 0.468   | 0.119  | 0.119 | 0.272  | 0.058  | 0.272   | 0.127  | 0.058   | 0.058   |       | 0.107   | 0.249   |
| <b>IL-4</b>                   | 0.823** | 0.682* | 0.372 | 0.461  | 0.440  | 0.766*  | 0.426  | 0.734*  | 0.858** | 0.572 | 1.000   | 0.373   |
| <i>Sig.</i>                   | 0.006   | 0.043  | 0.324 | 0.211  | 0.237  | 0.016   | 0.252  | 0.024   | 0.003   | 0.107 |         | 0.323   |
| <b>IL-22</b>                  | 0.230   | 0.513  | 0.319 | 0.287  | 0.579  | 0.331   | 0.131  | 0.817** | 0.253   | 0.429 | 0.373   | 1.000   |
| <i>Sig.</i>                   | 0.551   | 0.157  | 0.403 | 0.454  | 0.102  | 0.385   | 0.738  | 0.007   | 0.511   | 0.249 | 0.323   |         |

Notes to supplementary table 15: Significance is given by \*  $p < 0.05$  and \*\*  $p < 0.01$  (Spearman rank correlation).
